# Supplementary material for: Response to climate change of montane herbaceous plants in the genus Rhodiola predicted by ecological niche modelling
Source: PubMed Central journal article supplement (PMC5897335; doi:10.1038/s41598-018-24360-9), 2018-04-12
Supplement: 41598_2018_24360_MOESM1_ESM.pdf [file 41598_2018_24360_MOESM1_ESM.pdf]

# Response to climate change of montane herbaceous plants in the genus *Rhodiola* predicted by ecological niche modelling

Jianling You<sup>1</sup>, Xiaoping Qin<sup>1</sup>, Sailesh Ranjitkar<sup>2</sup>, Stephen C. Lougheed<sup>3</sup>, Mingcheng Wang<sup>2</sup>, Wen Zhou<sup>1</sup>, Dongxin Ouyang<sup>1</sup>, Yin Zhou<sup>1</sup>, Jianchu Xu<sup>2</sup>, Wenju Zhang<sup>1</sup>, Yuguo Wang<sup>1</sup>, Ji Yang<sup>1</sup> and Zhiping Song<sup>1\*</sup>

**Supplementary Table S1 Average AUC values of the sub-models used to determine the weights for the ensemble models of *Rhodiola* species and species groups.**

|                             | ENSEMBLE | MAXENT | RF    | MGCV  | GBMSTEP | GLMSTEP | MGCVFIX | GBM   | FDA   | MAHAL | SVM   | EARTH | GAM   | GAMSTEP | DOMAIN | SVME  | NNET  | BIOCLIM | RPART | GLM   |
|-----------------------------|----------|--------|-------|-------|---------|---------|---------|-------|-------|-------|-------|-------|-------|---------|--------|-------|-------|---------|-------|-------|
| <i>R. alsia</i>             | 0.983    | 0.981  | 0.982 | 0.980 | 0.975   | 0.976   | 0.977   | 0.975 | 0.978 | 0.971 | 0.972 | 0.975 | 0.970 | 0.967   | 0.974  | 0.950 | 0.960 | 0.876   | 0.782 | 0.507 |
| <i>R. bupleuroides</i>      | 0.984    | 0.983  | 0.981 | 0.980 | 0.974   | 0.973   | 0.973   | 0.968 | 0.980 | 0.972 | 0.959 | 0.962 | 0.961 | 0.959   | 0.948  | 0.946 | 0.948 | 0.937   | 0.861 | 0.977 |
| <i>R. chrysanthemifolia</i> | 0.991    | 0.990  | 0.991 | 0.990 | 0.985   | 0.990   | 0.986   | 0.985 | 0.985 | 0.988 | 0.968 | 0.986 | 0.974 | 0.973   | 0.973  | 0.935 | 0.931 | 0.908   | 0.901 | 0.529 |
| <i>R. crenulata</i>         | 0.981    | 0.976  | 0.979 | 0.973 | 0.970   | 0.975   | 0.972   | 0.967 | 0.972 | 0.976 | 0.960 | 0.955 | 0.962 | 0.963   | 0.960  | 0.937 | 0.945 | 0.926   | 0.826 | 0.862 |
| <i>R. dumulosa</i>          | 0.973    | 0.967  | 0.964 | 0.964 | 0.965   | 0.955   | 0.956   | 0.960 | 0.951 | 0.951 | 0.953 | 0.951 | 0.912 | 0.911   | 0.911  | 0.911 | 0.925 | 0.909   | 0.792 | 0.790 |
| <i>R. fastigiata</i>        | 0.985    | 0.983  | 0.979 | 0.982 | 0.970   | 0.982   | 0.982   | 0.971 | 0.977 | 0.970 | 0.961 | 0.966 | 0.971 | 0.971   | 0.965  | 0.943 | 0.960 | 0.920   | 0.925 | 0.873 |
| <i>R. forrestii</i>         | 0.994    | 0.993  | 0.991 | 0.993 | 0.989   | 0.991   | 0.987   | 0.987 | 0.992 | 0.991 | 0.957 | 0.905 | 0.981 | 0.982   | 0.990  | 0.906 | 0.930 | 0.850   | 0.846 | 0.604 |
| <i>R. henryi</i>            | 0.995    | 0.995  | 0.991 | 0.995 | 0.986   | 0.994   | 0.990   | 0.987 | 0.984 | 0.991 | 0.991 | 0.956 | 0.964 | 0.963   | 0.984  | 0.952 | 0.956 | 0.928   | 0.945 | 0.900 |
| <i>R. himalensis</i>        | 0.982    | 0.974  | 0.980 | 0.975 | 0.975   | 0.970   | 0.967   | 0.974 | 0.965 | 0.968 | 0.965 | 0.969 | 0.954 | 0.955   | 0.938  | 0.929 | 0.947 | 0.912   | 0.913 | 0.520 |
| <i>R. kirilowii</i>         | 0.979    | 0.970  | 0.973 | 0.966 | 0.966   | 0.954   | 0.959   | 0.962 | 0.955 | 0.951 | 0.961 | 0.958 | 0.913 | 0.913   | 0.913  | 0.926 | 0.867 | 0.910   | 0.817 | 0.772 |
| <i>R. quadrifida</i>        | 0.968    | 0.959  | 0.954 | 0.957 | 0.955   | 0.953   | 0.955   | 0.956 | 0.952 | 0.949 | 0.949 | 0.944 | 0.930 | 0.930   | 0.914  | 0.912 | 0.931 | 0.895   | 0.837 | 0.499 |
| <i>R. sacra</i>             | 0.994    | 0.994  | 0.991 | 0.993 | 0.982   | 0.993   | 0.993   | 0.981 | 0.987 | 0.991 | 0.982 | 0.992 | 0.987 | 0.986   | 0.981  | 0.959 | 0.961 | 0.930   | 0.939 | 0.716 |
| <i>R. wallichiana</i>       | 0.979    | 0.972  | 0.968 | 0.953 | 0.959   | 0.931   | 0.915   | 0.965 | 0.962 | 0.918 | 0.914 | 0.902 | 0.932 | 0.926   | 0.896  | 0.881 | 0.878 | 0.817   | 0.841 | 0.849 |
| <i>R. yunnanensis</i>       | 0.991    | 0.990  | 0.988 | 0.989 | 0.985   | 0.990   | 0.989   | 0.982 | 0.988 | 0.990 | 0.987 | 0.862 | 0.972 | 0.972   | 0.983  | 0.977 | 0.959 | 0.947   | 0.900 | 0.989 |
| G <sub>clade1</sub>         | 0.986    | 0.984  | 0.975 | 0.980 | 0.972   | 0.979   | 0.976   | 0.973 | 0.980 | 0.971 | 0.944 | 0.972 | 0.954 | 0.955   | 0.959  | 0.953 | 0.945 | 0.942   | 0.917 | 0.761 |
| G <sub>clade2</sub>         | 0.970    | 0.964  | 0.972 | 0.966 | 0.969   | 0.966   | 0.967   | 0.961 | 0.957 | 0.955 | 0.961 | 0.960 | 0.915 | 0.915   | 0.897  | 0.950 | 0.943 | 0.919   | 0.916 | 0.905 |
| G <sub>mon</sub>            | 0.977    | 0.974  | 0.976 | 0.970 | 0.973   | 0.964   | 0.968   | 0.963 | 0.962 | 0.953 | 0.946 | 0.958 | 0.925 | 0.924   | 0.919  | 0.929 | 0.931 | 0.926   | 0.896 | 0.746 |
| G <sub>dio</sub>            | 0.973    | 0.968  | 0.973 | 0.970 | 0.972   | 0.970   | 0.971   | 0.967 | 0.964 | 0.957 | 0.967 | 0.963 | 0.922 | 0.922   | 0.906  | 0.954 | 0.933 | 0.925   | 0.934 | 0.970 |
| G <sub>QTP</sub>            | 0.977    | 0.974  | 0.978 | 0.973 | 0.977   | 0.972   | 0.974   | 0.975 | 0.969 | 0.965 | 0.970 | 0.969 | 0.950 | 0.950   | 0.941  | 0.959 | 0.949 | 0.944   | 0.948 | 0.973 |
| G <sub>HM</sub>             | 0.993    | 0.992  | 0.991 | 0.992 | 0.990   | 0.992   | 0.992   | 0.985 | 0.990 | 0.992 | 0.989 | 0.987 | 0.975 | 0.975   | 0.987  | 0.977 | 0.967 | 0.964   | 0.912 | 0.992 |
| G <sub>wide</sub>           | 0.975    | 0.971  | 0.971 | 0.969 | 0.966   | 0.965   | 0.966   | 0.957 | 0.956 | 0.955 | 0.959 | 0.956 | 0.927 | 0.926   | 0.927  | 0.935 | 0.921 | 0.922   | 0.874 | 0.744 |
| G <sub>plain</sub>          | 0.995    | 0.995  | 0.991 | 0.995 | 0.986   | 0.994   | 0.990   | 0.987 | 0.984 | 0.991 | 0.991 | 0.956 | 0.964 | 0.963   | 0.984  | 0.952 | 0.956 | 0.928   | 0.945 | 0.900 |
| WHOLE                       | 0.970    | 0.965  | 0.972 | 0.966 | 0.970   | 0.966   | 0.967   | 0.963 | 0.959 | 0.955 | 0.963 | 0.963 | 0.914 | 0.914   | 0.901  | 0.952 | 0.916 | 0.924   | 0.919 | 0.952 |
| Average                     | 0.982    | 0.979  | 0.979 | 0.977 | 0.974   | 0.974   | 0.973   | 0.972 | 0.972 | 0.968 | 0.964 | 0.955 | 0.949 | 0.948   | 0.946  | 0.940 | 0.937 | 0.916   | 0.886 | 0.797 |

**Supplementary Table S2 Model evaluation metrics for Maxent: means test omission rates (OR) using the 10% training presence threshold, area under the receiver operating characteristic curve (AUC), true skill statistic (TSS) and test gains for all models of *Rhodiola* species.**

|                            | Threshold | OR    | AUC   | TSS   | Test gain |
|----------------------------|-----------|-------|-------|-------|-----------|
| <i>R. alsia</i>            | 0.378     | 0.116 | 0.979 | 0.956 | 2.675     |
| <i>R. bupleuroides</i>     | 0.274     | 0.117 | 0.980 | 0.965 | 2.830     |
| <i>R. chryanthemifolia</i> | 0.378     | 0.109 | 0.988 | 0.982 | 3.333     |
| <i>R. crenulata</i>        | 0.337     | 0.112 | 0.980 | 0.963 | 2.821     |
| <i>R. dumulosa</i>         | 0.418     | 0.125 | 0.962 | 0.929 | 2.095     |
| <i>R. fastigiata</i>       | 0.258     | 0.117 | 0.982 | 0.971 | 2.892     |
| <i>R. forrestii</i>        | 0.456     | 0.148 | 0.993 | 0.985 | 3.639     |
| <i>R. henryi</i>           | 0.292     | 0.121 | 0.991 | 0.989 | 3.550     |
| <i>R. himalensis</i>       | 0.435     | 0.127 | 0.974 | 0.955 | 2.587     |
| <i>R. kirilowii</i>        | 0.245     | 0.111 | 0.973 | 0.953 | 2.497     |
| <i>R. quadrifida</i>       | 0.387     | 0.150 | 0.957 | 0.902 | 1.964     |
| <i>R. sacra</i>            | 0.372     | 0.113 | 0.993 | 0.990 | 3.785     |
| <i>R. wallichiana</i>      | 0.362     | 0.132 | 0.979 | 0.951 | 2.702     |
| <i>R. yunnanensis</i>      | 0.298     | 0.117 | 0.989 | 0.985 | 3.322     |
| G <sub>clade1</sub>        | 0.291     | 0.114 | 0.982 | 0.978 | 2.958     |
| G <sub>clade2</sub>        | 0.288     | 0.103 | 0.929 | 0.923 | 1.621     |
| G <sub>mon</sub>           | 0.290     | 0.105 | 0.969 | 0.954 | 2.418     |
| G <sub>dio</sub>           | 0.292     | 0.102 | 0.932 | 0.927 | 1.677     |
| G <sub>QTP</sub>           | 0.276     | 0.099 | 0.948 | 0.941 | 1.962     |
| G <sub>HM</sub>            | 0.280     | 0.119 | 0.987 | 0.984 | 3.254     |
| G <sub>wide</sub>          | 0.287     | 0.114 | 0.966 | 0.949 | 2.314     |
| G <sub>plain</sub>         | 0.292     | 0.121 | 0.991 | 0.989 | 3.550     |
| WHOLE                      | 0.291     | 0.104 | 0.925 | 0.926 | 1.578     |

**Supplementary Table S3 Percentage of variable contribution based on jackknife test.** The highest contributions are presented in bold.

|                            | Mean<br>Diurnal<br>Range<br>(BIO2) | Isothermality<br>(BIO3) | Mean<br>Temperature<br>of Wettest<br>Quarter<br>(BIO8) | Mean<br>Temperature<br>of Driest<br>Quarter<br>(BIO9) | Precipitation<br>of Wettest<br>Month<br>(BIO13) | Precipitation<br>of Driest<br>Month<br>(BIO14) | Precipitation<br>Seasonality<br>(BIO15) | Precipitation<br>of Warmest<br>Quarter<br>(BIO18) | Precipitation<br>of Coldest<br>Quarter<br>(BIO19) |
|----------------------------|------------------------------------|-------------------------|--------------------------------------------------------|-------------------------------------------------------|-------------------------------------------------|------------------------------------------------|-----------------------------------------|---------------------------------------------------|---------------------------------------------------|
| <i>R. alsia</i>            | 0                                  | 26.7                    | <b>35.9</b>                                            | 18.2                                                  | 0                                               | 0                                              | 0.8                                     | 11.7                                              | 6.7                                               |
| <i>R. bupleuroides</i>     | 0.1                                | <b>36.6</b>             | 21.5                                                   | 34.5                                                  | 0.6                                             | 0.1                                            | 0.7                                     | 5.7                                               | 0.2                                               |
| <i>R. chryanthemifolia</i> | 0                                  | 43.8                    | 3.1                                                    | <b>49.6</b>                                           | 0                                               | 0                                              | 0.8                                     | 0.7                                               | 2                                                 |
| <i>R. crenulata</i>        | 0.1                                | <b>41</b>               | 35.4                                                   | 15                                                    | 0.1                                             | 0                                              | 0                                       | 8.4                                               | 0.2                                               |
| <i>R. dumulosa</i>         | 4.4                                | 3.7                     | <b>36.3</b>                                            | 19.1                                                  | 0.6                                             | 0.1                                            | 0.2                                     | 18.6                                              | 17.1                                              |
| <i>R. fastigiata</i>       | 1.6                                | <b>37.4</b>             | 19.3                                                   | 30.3                                                  | 0.1                                             | 0                                              | 0.4                                     | 9.3                                               | 1.6                                               |
| <i>R. forrestii</i>        | 0                                  | 33.8                    | 5.2                                                    | <b>44.9</b>                                           | 0.4                                             | 0.2                                            | 0                                       | 13.5                                              | 2.1                                               |
| <i>R. henryi</i>           | 17.8                               | 0.2                     | 6.2                                                    | <b>45.4</b>                                           | 0.3                                             | 0.8                                            | 4.8                                     | 20.2                                              | 4.4                                               |
| <i>R. himalensis</i>       | 0.1                                | 26.1                    | <b>37.3</b>                                            | 18.8                                                  | 0                                               | 1.8                                            | 0                                       | 13.5                                              | 2.3                                               |
| <i>R. kirilowii</i>        | 2.4                                | 3.8                     | <b>31.6</b>                                            | 27.5                                                  | 0.1                                             | 0.5                                            | 2.3                                     | 20.1                                              | 11.9                                              |
| <i>R. quadrifida</i>       | 0                                  | 8.7                     | <b>66.5</b>                                            | 8.4                                                   | 0.1                                             | 0.9                                            | 0.3                                     | 6.9                                               | 8.1                                               |
| <i>R. sacra</i>            | 0.2                                | <b>40.3</b>             | 1                                                      | 39                                                    | 0                                               | 5.6                                            | 5.1                                     | 4.4                                               | 4.3                                               |
| <i>R. wallichiana</i>      | 0.2                                | 25.3                    | 22.6                                                   | <b>50.6</b>                                           | 0                                               | 0.5                                            | 0                                       | 0.4                                               | 0.5                                               |
| <i>R. yunnanensis</i>      | 3.8                                | 16.3                    | 11                                                     | <b>37.3</b>                                           | 1.2                                             | 0.3                                            | 0.6                                     | 26.4                                              | 3.3                                               |
| G <sub>clade1</sub>        | 0.5                                | <b>38.9</b>             | 15.4                                                   | 38.7                                                  | 0.1                                             | 0                                              | 3                                       | 3.2                                               | 0.3                                               |
| G <sub>clade2</sub>        | 2.4                                | 18.9                    | 19.7                                                   | <b>36.6</b>                                           | 0.6                                             | 0.3                                            | 1                                       | 19.5                                              | 1.1                                               |
| G <sub>mon</sub>           | 3                                  | 14                      | 27.1                                                   | <b>31.9</b>                                           | 2.4                                             | 1.8                                            | 2.4                                     | 15.9                                              | 1.6                                               |
| G <sub>dio</sub>           | 2.1                                | 21                      | 18.6                                                   | <b>37.2</b>                                           | 0.3                                             | 0.1                                            | 1                                       | 18.7                                              | 1                                                 |
| G <sub>QTP</sub>           | 0.6                                | <b>40</b>               | 26.2                                                   | 23.3                                                  | 0.1                                             | 0.1                                            | 0.2                                     | 9.3                                               | 0.3                                               |
| G <sub>HM</sub>            | 2.6                                | 16.7                    | 13.1                                                   | <b>31.6</b>                                           | 1.1                                             | 0.3                                            | 0.5                                     | 30.8                                              | 3.4                                               |
| G <sub>wide</sub>          | 3                                  | 6.1                     | <b>30</b>                                              | 23.2                                                  | 0.2                                             | 0.4                                            | 2.4                                     | 22.7                                              | 12                                                |
| G <sub>plain</sub>         | 17.8                               | 0.2                     | 6.2                                                    | <b>45.4</b>                                           | 0.3                                             | 0.8                                            | 4.8                                     | 20.2                                              | 4.4                                               |
| WHOLE                      | 2                                  | 21.4                    | 19.1                                                   | <b>36.8</b>                                           | 0.9                                             | 0.2                                            | 1                                       | 17.9                                              | 0.9                                               |

**Supplementary Table S4** Factor loadings of bioclimatic variables for temperature principal components analysis axes (Temp1 and Temp2).

|      | Temp1  | Temp2  |
|------|--------|--------|
| BIO2 | -0.505 | 0.743  |
| BIO3 | 0.090  | 0.979  |
| BIO8 | 0.796  | -0.378 |
| BIO9 | 0.971  | 0.128  |

**Supplementary Table S5** Factor loadings of bioclimatic variables for principal components analysis axes (Prec1 and Prec 2).

|       | Prec1  | Prec2  |
|-------|--------|--------|
| BIO13 | 0.212  | 0.973  |
| BIO14 | 0.865  | 0.357  |
| BIO15 | -0.854 | -0.091 |
| BIO18 | 0.182  | 0.978  |
| BIO19 | 0.879  | 0.157  |

**Supplementary Table S6** Factor loadings of bioclimatic variables for canonical structure of discriminant functions (Function1, Function2 and Function3).

|       | Function1 | Function2 | Function3 |
|-------|-----------|-----------|-----------|
| Temp2 | 0.758     | 0.606     | -0.076    |
| Prec1 | -0.503    | 0.448     | -0.173    |
| Temp1 | -0.439    | 0.827     | -0.227    |
| Prec2 | 0.127     | 0.587     | 0.795     |

**Supplementary Table S7 Predicted suitable area (km<sup>2</sup>) of *Rhodiola* species and species groups for each GCMs in LGM of ensemble models.**

|                            | CCSM4  | MIROC-ESM | MPI-ESM-P | MIROC  | min   | mean   | max    |
|----------------------------|--------|-----------|-----------|--------|-------|--------|--------|
| <i>R. alsia</i>            | 29544  | 28432     | 30038     | 28209  | 23545 | 29754  | 34474  |
| <i>R. bupleuroides</i>     | 33452  | 34597     | 37638     | 35386  | 26580 | 34687  | 43697  |
| <i>R. chryanthemifolia</i> | 16634  | 16794     | 16135     | 19685  | 11379 | 16815  | 23083  |
| <i>R. crenulata</i>        | 20372  | 26761     | 24529     | 27065  | 14863 | 24662  | 34292  |
| <i>R. dumulosa</i>         | 11873  | 9461      | 11526     | 12007  | 5519  | 9319   | 17138  |
| <i>R. fastigiata</i>       | 29258  | 27539     | 28151     | 28538  | 22160 | 28098  | 34764  |
| <i>R. forrestii</i>        | 7167   | 7836      | 8418      | 8042   | 5004  | 7336   | 10741  |
| <i>R. henryi</i>           | 10346  | 11540     | 11798     | 11749  | 8578  | 11019  | 13928  |
| <i>R. himalensis</i>       | 30972  | 31250     | 29564     | 28619  | 22568 | 30835  | 37563  |
| <i>R. kirilowii</i>        | 12289  | 9744      | 10937     | 10222  | 5464  | 9301   | 15965  |
| <i>R. quadrifida</i>       | 25039  | 20546     | 21001     | 19933  | 12031 | 19659  | 31544  |
| <i>R. sacra</i>            | 8222   | 9198      | 7393      | 7998   | 5814  | 7972   | 10602  |
| <i>R. wallichiana</i>      | 5534   | 7691      | 6846      | 7069   | 3380  | 5744   | 10365  |
| <i>R. yunnanensis</i>      | 21270  | 19045     | 19128     | 19066  | 14531 | 19182  | 24790  |
| G <sub>clade1</sub>        | 27505  | 29152     | 31660     | 31317  | 22304 | 28961  | 37852  |
| G <sub>clade2</sub>        | 106901 | 103180    | 101560    | 102393 | 86103 | 101676 | 120858 |
| G <sub>mon</sub>           | 45945  | 39545     | 43263     | 42009  | 32686 | 42180  | 53332  |
| G <sub>dio</sub>           | 99322  | 97966     | 94813     | 98149  | 83113 | 96342  | 112189 |
| G <sub>QTP</sub>           | 82479  | 81207     | 82265     | 80436  | 72517 | 81275  | 90553  |
| G <sub>HM</sub>            | 19106  | 17834     | 19286     | 18157  | 13956 | 18180  | 23265  |
| G <sub>wide</sub>          | 44223  | 41406     | 44621     | 41469  | 35885 | 42441  | 50313  |
| G <sub>plain</sub>         | 10346  | 11540     | 11798     | 11749  | 8578  | 11019  | 13928  |
| WHOLE                      | 126056 | 102697    | 103574    | 103947 | 90466 | 105768 | 126949 |

**Supplementary Table S8 Predicted suitable area (km<sup>2</sup>) of *Rhodiola* species and species groups for each GCMs in 2050 RCP8.5 of ensemble models.**

|                            | ACCES<br>S1-0 | BCC-<br>CSM1-<br>1 | CCSM4  | CNRM-<br>CM5 | GFDL-<br>CM3 | GISS-<br>E2-R | HadGE<br>M2-AO | HadGE<br>M2-CC | HadGE<br>M2-ES | INMC<br>M4 | IPSL-<br>CM5A-<br>LR | MIROC<br>-ESM-<br>CHEM | MIROC<br>-ESM | MIROC<br>5 | MPI-<br>ESM-<br>LR | MRI-<br>CGCM<br>3 | NorES<br>M1-M | min   | mean   | max    |
|----------------------------|---------------|--------------------|--------|--------------|--------------|---------------|----------------|----------------|----------------|------------|----------------------|------------------------|---------------|------------|--------------------|-------------------|---------------|-------|--------|--------|
| <i>R. alsia</i>            | 29418         | 29656              | 28492  | 28898        | 28841        | 28099         | 30104          | 27855          | 28586          | 29339      | 27391                | 27552                  | 29230         | 28908      | 28298              | 30579             | 29199         | 23614 | 29261  | 34670  |
| <i>R. bupleuroides</i>     | 35812         | 34104              | 34035  | 35275        | 33066        | 42347         | 36106          | 35847          | 36853          | 35116      | 35641                | 31807                  | 32316         | 34991      | 31800              | 34682             | 33365         | 28228 | 34554  | 41754  |
| <i>R. chryanthemifolia</i> | 18073         | 17177              | 16894  | 17672        | 14893        | 15924         | 17633          | 18161          | 18139          | 15985      | 17492                | 16718                  | 14798         | 17956      | 16184              | 17117             | 17789         | 12266 | 17072  | 21784  |
| <i>R. crenulata</i>        | 20633         | 24563              | 25895  | 21209        | 29605        | 27467         | 26844          | 28129          | 26511          | 22559      | 28567                | 24150                  | 25682         | 28010      | 26552              | 27109             | 25075         | 15640 | 25781  | 35513  |
| <i>R. dumulosa</i>         | 8121          | 9606               | 9059   | 9360         | 9807         | 9576          | 8398           | 7683           | 8779           | 9119       | 9785                 | 9787                   | 10454         | 9700       | 8744               | 9840              | 9468          | 5544  | 8183   | 13131  |
| <i>R. fastigiata</i>       | 29561         | 29551              | 27429  | 28392        | 30788        | 37722         | 28811          | 26889          | 29258          | 27406      | 25936                | 27777                  | 27038         | 27649      | 30540              | 30597             | 27685         | 22286 | 28843  | 35524  |
| <i>R. forrestii</i>        | 8837          | 8379               | 8186   | 8367         | 7811         | 7710          | 8387           | 8957           | 9031           | 8810       | 8311                 | 8776                   | 7895          | 8179       | 8859               | 8103              | 7575          | 5751  | 8113   | 11028  |
| <i>R. henryi</i>           | 11314         | 10442              | 12505  | 9978         | 10725        | 13046         | 10230          | 13030          | 10621          | 10304      | 10839                | 10617                  | 12545         | 10647      | 11052              | 13339             | 12007         | 8780  | 11119  | 13856  |
| <i>R. himalensis</i>       | 28041         | 30404              | 30255  | 31597        | 29897        | 28698         | 28789          | 27101          | 28443          | 30552      | 28239                | 31002                  | 27523         | 32415      | 30919              | 33519             | 29966         | 21432 | 30171  | 38117  |
| <i>R. kirilowii</i>        | 8846          | 9726               | 8763   | 8798         | 9857         | 9512          | 9138           | 7731           | 8853           | 9514       | 9431                 | 9634                   | 10317         | 9966       | 8999               | 10147             | 9159          | 5776  | 8666   | 12781  |
| <i>R. quadrifida</i>       | 20705         | 21296              | 21411  | 21663        | 21408        | 22069         | 21264          | 23849          | 22929          | 18611      | 17468                | 22821                  | 20942         | 22470      | 18680              | 21733             | 23702         | 13774 | 20056  | 29502  |
| <i>R. sacra</i>            | 8520          | 8677               | 8493   | 8296         | 8057         | 8169          | 8382           | 8339           | 8425           | 8805       | 7780                 | 8631                   | 8577          | 8485       | 8521               | 8196              | 8489          | 6104  | 8260   | 10713  |
| <i>R. wallichiana</i>      | 7747          | 6619               | 7098   | 7447         | 8226         | 8263          | 6716           | 6453           | 6770           | 7569       | 6527                 | 6497                   | 7275          | 6829       | 6792               | 7655              | 7506          | 3522  | 6680   | 11289  |
| <i>R. yunnanensis</i>      | 19127         | 19042              | 18157  | 18733        | 17378        | 19157         | 18979          | 18541          | 18229          | 18966      | 19058                | 20103                  | 18008         | 18426      | 17716              | 19395             | 18361         | 15282 | 18587  | 22106  |
| G <sub>clade1</sub>        | 25499         | 27717              | 27732  | 30525        | 26160        | 27270         | 27603          | 28568          | 28682          | 27369      | 26740                | 28553                  | 26905         | 29758      | 27394              | 29421             | 25600         | 22301 | 27446  | 33391  |
| G <sub>clade2</sub>        | 103406        | 101271             | 100943 | 100699       | 107194       | 104742        | 102611         | 102612         | 102710         | 124392     | 104632               | 104340                 | 104200        | 106627     | 99406              | 103111            | 98565         | 88541 | 103019 | 120278 |
| G <sub>mon</sub>           | 37023         | 39792              | 37941  | 40536        | 39777        | 39442         | 37753          | 37314          | 39219          | 39858      | 36923                | 41157                  | 38666         | 41481      | 38904              | 40833             | 38713         | 31002 | 38612  | 47409  |
| G <sub>dio</sub>           | 95860         | 95227              | 94356  | 95489        | 103553       | 98217         | 95850          | 96888          | 97686          | 98238      | 98586                | 98469                  | 98965         | 99850      | 95889              | 96678             | 92625         | 84451 | 96534  | 111009 |
| G <sub>QTP</sub>           | 81020         | 76746              | 80366  | 81563        | 88233        | 82078         | 80180          | 83867          | 83307          | 85228      | 83908                | 82261                  | 84412         | 81269      | 80046              | 79807             | 78515         | 71219 | 82687  | 91663  |
| G <sub>HM</sub>            | 20094         | 19165              | 18276  | 18961        | 17590        | 19160         | 19286          | 19049          | 24080          | 19277      | 18414                | 19609                  | 18386         | 18174      | 18692              | 18365             | 18021         | 15510 | 18794  | 22710  |
| G <sub>wide</sub>          | 43857         | 42808              | 42639  | 43470        | 43911        | 43196         | 43951          | 40978          | 42904          | 42111      | 41691                | 43167                  | 42400         | 45335      | 40992              | 46232             | 42554         | 37469 | 42687  | 48867  |
| G <sub>plain</sub>         | 11314         | 10442              | 12505  | 9978         | 10725        | 13046         | 10230          | 13030          | 10621          | 10304      | 10839                | 10617                  | 12545         | 10647      | 11052              | 13339             | 12007         | 8780  | 11119  | 13856  |
| WHOLE                      | 101585        | 101635             | 94261  | 102019       | 113063       | 109542        | 99224          | 120260         | 120009         | 110426     | 97775                | 96728                  | 99321         | 106205     | 100330             | 102558            | 100329        | 88455 | 104059 | 120090 |

**Supplementary Table S9 The range of distribution shift of *Rhodiola* species and species groups at each period ( $\Delta S$ , %/year) for MEAN ENSEMBLE, MMM ENSEMBLE and Maxent calculated by equation (1).  $\Delta S1$ ,  $\Delta S2$  and  $\Delta S3$  are the values at the period from LIG to LGM, LGM to current and current to future, respectively.**

|                            | MEAN ENSEMBLE |             |             | MMM ENSEMBLE |             |             | Maxent      |             |             |
|----------------------------|---------------|-------------|-------------|--------------|-------------|-------------|-------------|-------------|-------------|
|                            | $\Delta S1$   | $\Delta S2$ | $\Delta S3$ | $\Delta S1$  | $\Delta S2$ | $\Delta S3$ | $\Delta S1$ | $\Delta S2$ | $\Delta S3$ |
| <i>R. alsia</i>            | 0.000002      | -0.000001   | 0.000033    | 0.000000     | 0.000005    | 0.000715    | 0.000029    | 0.000006    | -0.000022   |
| <i>R. bupleuroides</i>     | 0.000000      | 0.000000    | 0.000067    | 0.000000     | 0.000000    | 0.000191    | 0.000003    | 0.000017    | 0.007481    |
| <i>R. chryanthemifolia</i> | -0.000001     | 0.000004    | -0.000904   | -0.000002    | 0.000010    | -0.000173   | 0.000028    | 0.000021    | 0.012870    |
| <i>R. crenulata</i>        | -0.000001     | -0.000007   | 0.003249    | -0.000005    | 0.000017    | 0.004461    | 0.000176    | -0.000007   | 0.001148    |
| <i>R. dumulosa</i>         | -0.000002     | 0.000001    | -0.001961   | -0.000004    | 0.000017    | 0.000675    | -0.000005   | 0.000017    | -0.000833   |
| <i>R. fastigiata</i>       | 0.000000      | -0.000002   | 0.000854    | -0.000001    | 0.000000    | 0.003008    | 0.000056    | 0.000015    | 0.005114    |
| <i>R. forrestii</i>        | 0.000002      | 0.000005    | 0.000051    | 0.000003     | 0.000001    | 0.000782    | 0.000014    | -0.000008   | 0.011645    |
| <i>R. henryi</i>           | -0.000003     | -0.000003   | 0.000941    | -0.000004    | -0.000002   | 0.003132    | 0.000010    | -0.000011   | -0.011592   |
| <i>R. himalensis</i>       | 0.000001      | 0.000001    | -0.000679   | 0.000000     | 0.000008    | 0.000553    | -0.000001   | 0.000019    | 0.002542    |
| <i>R. kirilowii</i>        | -0.000002     | 0.000000    | -0.000920   | -0.000003    | 0.000008    | -0.000096   | 0.000003    | 0.000009    | 0.001541    |
| <i>R. quadrifida</i>       | 0.000000      | 0.000008    | -0.001805   | -0.000004    | 0.000044    | -0.000528   | 0.000004    | -0.000006   | -0.003235   |
| <i>R. sacra</i>            | -0.000001     | 0.000001    | 0.000177    | -0.000002    | 0.000004    | 0.001812    | 0.000031    | 0.000070    | 0.016760    |
| <i>R. wallichiana</i>      | 0.000000      | 0.000011    | -0.000909   | 0.000000     | 0.000012    | 0.000988    | 0.000006    | 0.000002    | 0.003441    |
| <i>R. yunnanensis</i>      | 0.000001      | -0.000002   | 0.000034    | 0.000000     | 0.000002    | 0.000170    | 0.000007    | -0.000004   | 0.000403    |
| G <sub>clade1</sub>        | -0.000001     | -0.000002   | -0.000202   | -0.000001    | -0.000001   | 0.000398    | -0.000001   | 0.000036    | 0.013119    |
| G <sub>clade2</sub>        | -0.000001     | 0.000000    | 0.000301    | -0.000001    | 0.000000    | 0.001947    | 0.000002    | 0.000013    | 0.001150    |
| G <sub>mon</sub>           | 0.000000      | -0.000006   | 0.000653    | -0.000001    | -0.000004   | 0.001454    | -0.000006   | 0.000026    | 0.009068    |
| G <sub>dio</sub>           | -0.000001     | 0.000000    | 0.000124    | -0.000001    | 0.000000    | 0.002484    | 0.000004    | 0.000011    | 0.001243    |
| G <sub>QTP</sub>           | 0.000000      | -0.000001   | 0.000484    | 0.000000     | 0.000000    | 0.000695    | 0.000002    | 0.000022    | 0.002754    |
| G <sub>HM</sub>            | 0.000002      | 0.000001    | 0.000156    | 0.000002     | -0.000001   | 0.001652    | 0.000013    | -0.000006   | 0.000671    |
| G <sub>wide</sub>          | 0.000000      | 0.000000    | -0.000058   | 0.000000     | 0.000001    | 0.000444    | -0.000002   | 0.000012    | 0.002672    |
| G <sub>plain</sub>         | -0.000003     | -0.000003   | 0.000941    | -0.000004    | -0.000002   | 0.003132    | 0.000010    | -0.000011   | -0.011592   |
| WHOLE                      | -0.000001     | 0.000001    | -0.000455   | -0.000002    | 0.000004    | -0.000632   | 0.000002    | 0.000014    | 0.001322    |

**Supplementary Table S10 Elevation variation rate of *Rhodiola* species and species groups for MEAN ENSEMBLE, MMM ENSEMBLE and Maxent at each period ( $u_{alt}$ , m/year) calculated by using equation (2).  $u_{alt1}$ ,  $u_{alt2}$  and  $u_{alt3}$  are the values of elevation variation rate from LIG to LGM, LGM to current and current to future, respectively.**

|                            | MEAN ENSEMBLE |            |            | MMM ENSEMBLE |            |            | Maxent     |            |            |
|----------------------------|---------------|------------|------------|--------------|------------|------------|------------|------------|------------|
|                            | $u_{alt1}$    | $u_{alt2}$ | $u_{alt3}$ | $u_{alt1}$   | $u_{alt2}$ | $u_{alt3}$ | $u_{alt1}$ | $u_{alt2}$ | $u_{alt3}$ |
| <i>R. alsia</i>            | -0.001        | 0.001      | 0.030      | 0.000        | -0.002     | 0.697      | 0.000      | 0.024      | 3.320      |
| <i>R. bupleuroides</i>     | 0.000         | 0.000      | 0.573      | 0.000        | 0.001      | 0.276      | 0.003      | 0.043      | 4.560      |
| <i>R. chryanthemifolia</i> | 0.000         | 0.000      | -0.139     | 0.000        | 0.002      | -0.276     | -0.002     | 0.042      | 7.640      |
| <i>R. crenulata</i>        | 0.001         | 0.002      | 0.169      | 0.002        | -0.002     | -0.075     | -0.001     | 0.020      | 2.280      |
| <i>R. dumulosa</i>         | -0.001        | -0.002     | -1.869     | -0.002       | 0.001      | -0.348     | -0.002     | 0.040      | 12.160     |
| <i>R. fastigiata</i>       | 0.000         | 0.001      | 0.319      | 0.000        | 0.000      | 0.948      | -0.001     | 0.029      | 5.267      |
| <i>R. forrestii</i>        | 0.000         | 0.000      | 0.305      | 0.000        | 0.000      | 1.599      | -0.002     | 0.035      | 8.560      |
| <i>R. henryi</i>           | 0.002         | 0.000      | -0.334     | 0.002        | 0.002      | -1.648     | 0.005      | 0.016      | 22.067     |
| <i>R. himalensis</i>       | -0.001        | 0.001      | 0.015      | -0.001       | 0.000      | 0.279      | -0.003     | 0.023      | 3.053      |
| <i>R. kirilowii</i>        | -0.001        | -0.001     | -0.568     | -0.002       | 0.004      | -1.036     | -0.003     | 0.034      | 12.240     |
| <i>R. quadrifida</i>       | 0.001         | 0.000      | -1.088     | 0.001        | 0.001      | -0.494     | 0.002      | 0.018      | 2.693      |
| <i>R. sacra</i>            | -0.001        | 0.000      | 0.141      | -0.001       | 0.000      | 0.127      | 0.007      | 0.019      | 5.587      |
| <i>R. wallichiana</i>      | 0.000         | -0.001     | -0.008     | 0.000        | -0.002     | -0.509     | 0.003      | 0.053      | 2.960      |
| <i>R. yunnanensis</i>      | 0.000         | 0.000      | 0.634      | 0.000        | -0.001     | 0.107      | -0.015     | 0.050      | 6.573      |
| G <sub>clade1</sub>        | 0.000         | -0.002     | 0.436      | 0.000        | -0.001     | 0.877      | 0.004      | 0.041      | 5.413      |
| G <sub>clade2</sub>        | 0.001         | 0.000      | 0.019      | 0.001        | 0.000      | 0.447      | -0.009     | 0.047      | 6.787      |
| G <sub>mon</sub>           | -0.001        | 0.002      | -0.586     | -0.001       | 0.001      | -0.776     | -0.012     | 0.054      | 7.347      |
| G <sub>dio</sub>           | 0.001         | 0.000      | 0.030      | 0.001        | 0.000      | -3.460     | -0.007     | 0.049      | 6.573      |
| G <sub>QTP</sub>           | 0.000         | -0.002     | 0.708      | 0.000        | -0.001     | 0.295      | -0.005     | 0.029      | 3.147      |
| G <sub>HM</sub>            | 0.001         | 0.000      | 0.615      | 0.000        | 0.000      | 0.903      | -0.017     | 0.052      | 6.760      |
| G <sub>wide</sub>          | 0.001         | 0.000      | -0.214     | 0.001        | -0.001     | 0.275      | -0.003     | 0.034      | 12.133     |
| G <sub>plain</sub>         | 0.002         | 0.000      | -0.334     | 0.002        | 0.002      | -1.648     | 0.005      | 0.016      | 22.067     |
| WHOLE                      | 0.001         | -0.001     | 0.230      | 0.000        | 0.001      | -1.268     | -0.009     | 0.048      | 6.413      |



**Supplementary Table S11 The variation rate of longitude ( $u_{lon}$ ) of distribution center of *Rhodiola* species and species groups at each period ( %year) for MEAN ENSEMBLE, MMM ENSEMBLE and Maxent calculated by equation (2).  $u_{lon1}$ ,  $u_{lon2}$ , and  $u_{lon3}$  are the values at the period from LIG to LGM, LGM to current, and current to future, respectively.**

|                            | MEAN ENSEMBLE |            |            | MMM ENSEMBLE |            |            | Maxent     |            |            |
|----------------------------|---------------|------------|------------|--------------|------------|------------|------------|------------|------------|
|                            | $u_{lon1}$    | $u_{lon2}$ | $u_{lon3}$ | $u_{lon1}$   | $u_{lon2}$ | $u_{lon3}$ | $u_{lon1}$ | $u_{lon2}$ | $u_{lon3}$ |
| <i>R. alsia</i>            | 0.000002      | 0.000001   | -0.001101  | 0.000002     | -0.000002  | -0.005315  | -0.000033  | -0.000015  | -0.010150  |
| <i>R. bupleuroides</i>     | -0.000001     | -0.000024  | 0.002845   | -0.000001    | -0.000023  | 0.000022   | -0.000004  | -0.000084  | -0.007880  |
| <i>R. chryanthemifolia</i> | -0.000004     | 0.000004   | 0.002968   | -0.000006    | 0.000012   | -0.012894  | -0.000028  | -0.000096  | -0.023154  |
| <i>R. crenulata</i>        | -0.000011     | -0.000004  | 0.000324   | -0.000026    | 0.000063   | 0.001765   | -0.000057  | -0.000031  | -0.001310  |
| <i>R. dumulosa</i>         | 0.000000      | 0.000008   | 0.009844   | 0.000005     | -0.000016  | 0.000814   | 0.000015   | -0.000174  | -0.052299  |
| <i>R. fastigiata</i>       | 0.000004      | -0.000027  | -0.000318  | -0.000005    | 0.000013   | -0.016515  | -0.000023  | -0.000119  | -0.025147  |
| <i>R. forrestii</i>        | -0.000007     | -0.000026  | 0.003383   | -0.000014    | 0.000005   | -0.000836  | 0.000001   | -0.000034  | -0.020692  |
| <i>R. henryi</i>           | 0.000002      | -0.000008  | 0.002082   | 0.000001     | -0.000001  | -0.000043  | -0.000030  | -0.000014  | -0.283755  |
| <i>R. himalensis</i>       | 0.000012      | -0.000019  | 0.001572   | 0.000012     | -0.000018  | -0.002581  | 0.000012   | -0.000104  | -0.016271  |
| <i>R. kirilowii</i>        | 0.000010      | -0.000012  | 0.003803   | 0.000017     | -0.000040  | 0.001625   | 0.000070   | -0.000232  | -0.040661  |
| <i>R. quadrifida</i>       | 0.000001      | -0.000014  | 0.004069   | 0.000007     | -0.000041  | -0.001850  | -0.000027  | 0.000008   | -0.002401  |
| <i>R. sacra</i>            | 0.000003      | 0.000002   | -0.002482  | 0.000000     | 0.000015   | 0.004611   | -0.000073  | -0.000050  | -0.011320  |
| <i>R. wallichiana</i>      | 0.000013      | 0.000081   | -0.000349  | 0.000001     | 0.000133   | 0.008876   | -0.000052  | 0.000059   | -0.003034  |
| <i>R. yunnanensis</i>      | -0.000004     | -0.000001  | -0.001917  | -0.000007    | 0.000012   | -0.007157  | 0.000016   | -0.000063  | -0.033610  |
| G <sub>clade1</sub>        | -0.000001     | -0.000033  | 0.003973   | -0.000007    | -0.000004  | 0.001427   | 0.000012   | -0.000121  | -0.017659  |
| G <sub>clade2</sub>        | -0.000008     | 0.000007   | -0.000029  | -0.000009    | 0.000013   | -0.006934  | 0.000039   | -0.000212  | -0.037623  |
| G <sub>mon</sub>           | 0.000010      | -0.000037  | 0.002038   | 0.000001     | 0.000003   | -0.001269  | 0.000064   | -0.000242  | -0.044743  |
| G <sub>dio</sub>           | -0.000006     | 0.000010   | 0.000537   | -0.000006    | 0.000010   | 0.005014   | 0.000029   | -0.000220  | -0.029046  |
| G <sub>QTP</sub>           | -0.000003     | 0.000030   | -0.005221  | -0.000003    | 0.000033   | -0.006344  | 0.000008   | -0.000152  | -0.008153  |
| G <sub>HM</sub>            | -0.000001     | 0.000037   | -0.012430  | 0.000003     | 0.000019   | -0.022213  | 0.000014   | -0.000034  | -0.030984  |
| G <sub>wide</sub>          | -0.000006     | 0.000004   | 0.002028   | -0.000006    | 0.000004   | -0.005852  | 0.000105   | -0.000269  | -0.052864  |
| G <sub>plain</sub>         | 0.000002      | -0.000008  | 0.002082   | 0.000001     | -0.000001  | -0.000043  | -0.000030  | -0.000014  | -0.283755  |
| WHOLE                      | -0.000006     | 0.000019   | -0.002269  | -0.000003    | 0.000007   | -0.002762  | 0.000041   | -0.000219  | -0.030994  |

**Supplementary Table S12** The variation rate of latitude ( $u_{lat}$ ) of distribution center of *Rhodiola* species and species groups at each period (%year) for MEAN ENSEMBLE, MMM ENSEMBLE and Maxent calculated by equation (2).  $u_{lat1}$ ,  $u_{lat2}$ , and  $u_{lat3}$  are the values at the period from LIG to LGM, LGM to current, and current to future, respectively.

|                            | MEAN ENSEMBLE |            |            | MMM ENSEMBLE |            |            | Maxent     |            |            |
|----------------------------|---------------|------------|------------|--------------|------------|------------|------------|------------|------------|
|                            | $u_{lat1}$    | $u_{lat2}$ | $u_{lat3}$ | $u_{lat1}$   | $u_{lat2}$ | $u_{lat3}$ | $u_{lat1}$ | $u_{lat2}$ | $u_{lat3}$ |
| <i>R. alsia</i>            | 0.00001       | 0.00000    | -0.00175   | 0.00001      | 0.00000    | -0.00032   | 0.00002    | 0.00000    | 0.00674    |
| <i>R. bupleuroides</i>     | 0.00000       | -0.00001   | -0.00055   | 0.00000      | -0.00001   | -0.00043   | -0.00003   | 0.00004    | 0.01399    |
| <i>R. chryanthemifolia</i> | 0.00000       | 0.00000    | -0.00068   | 0.00000      | 0.00000    | -0.00063   | 0.00000    | 0.00005    | 0.01535    |
| <i>R. crenulata</i>        | 0.00000       | -0.00001   | 0.00078    | 0.00000      | 0.00001    | 0.00318    | 0.00002    | 0.00002    | 0.00637    |
| <i>R. dumulosa</i>         | 0.00001       | 0.00000    | 0.00568    | 0.00001      | 0.00000    | -0.00019   | 0.00001    | 0.00005    | 0.00323    |
| <i>R. fastigiata</i>       | 0.00000       | -0.00001   | 0.00024    | 0.00000      | 0.00000    | -0.00035   | 0.00001    | 0.00003    | 0.00988    |
| <i>R. forrestii</i>        | 0.00000       | 0.00000    | 0.00085    | 0.00000      | 0.00000    | 0.00371    | 0.00000    | 0.00006    | 0.01903    |
| <i>R. henryi</i>           | 0.00000       | 0.00000    | -0.00021   | 0.00000      | -0.00002   | 0.00584    | 0.00001    | 0.00009    | 0.05217    |
| <i>R. himalensis</i>       | 0.00000       | -0.00001   | -0.00047   | 0.00000      | 0.00000    | -0.00128   | 0.00001    | 0.00002    | 0.00802    |
| <i>R. kirilowii</i>        | 0.00000       | 0.00001    | 0.00105    | 0.00001      | 0.00000    | 0.00131    | 0.00002    | -0.00002   | 0.01081    |
| <i>R. quadrifida</i>       | -0.00001      | 0.00001    | 0.00767    | -0.00001     | 0.00001    | 0.00559    | 0.00001    | -0.00004   | -0.00057   |
| <i>R. sacra</i>            | 0.00000       | 0.00000    | -0.00016   | 0.00000      | 0.00000    | -0.00104   | 0.00000    | -0.00001   | 0.00925    |
| <i>R. wallichiana</i>      | 0.00000       | -0.00001   | -0.00025   | 0.00000      | -0.00001   | 0.00180    | -0.00001   | -0.00005   | 0.01361    |
| <i>R. yunnanensis</i>      | 0.00000       | -0.00001   | -0.00057   | 0.00000      | 0.00000    | -0.00191   | 0.00001    | 0.00004    | 0.01226    |
| G <sub>clade1</sub>        | 0.00000       | -0.00001   | -0.00151   | 0.00000      | 0.00000    | -0.00139   | -0.00004   | 0.00005    | 0.01706    |
| G <sub>clade2</sub>        | 0.00000       | 0.00000    | -0.00012   | 0.00000      | 0.00001    | 0.00138    | 0.00001    | 0.00003    | 0.01223    |
| G <sub>mon</sub>           | 0.00000       | -0.00002   | 0.00023    | 0.00000      | -0.00001   | 0.00172    | 0.00000    | -0.00002   | 0.01519    |
| G <sub>dio</sub>           | 0.00000       | 0.00000    | 0.00004    | 0.00000      | 0.00000    | 0.00916    | 0.00001    | 0.00296    | -0.84653   |
| G <sub>QTP</sub>           | 0.00000       | 0.00000    | 0.00001    | 0.00000      | 0.00000    | -0.00096   | 0.00000    | 0.00004    | 0.01206    |
| G <sub>HM</sub>            | 0.00001       | -0.00001   | 0.00019    | 0.00000      | 0.00000    | 0.00060    | 0.00001    | 0.00003    | 0.01511    |
| G <sub>wide</sub>          | 0.00000       | -0.00001   | 0.00221    | -0.00001     | 0.00002    | -0.00653   | 0.00002    | -0.00003   | 0.01076    |
| G <sub>plain</sub>         | 0.00000       | 0.00000    | -0.00021   | 0.00000      | -0.00002   | 0.00584    | 0.00001    | 0.00009    | 0.05217    |
| WHOLE                      | 0.00000       | 0.00001    | -0.00383   | 0.00000      | 0.00001    | -0.00289   | 0.00001    | 0.00003    | 0.01129    |

**Supplementary Table S13** The  $p$ -values in  $\chi^2$  tests for  $\Delta S$ ,  $u_{alt}$  and  $u_{lat}$  between three pairs of sister species,  $G_{clade1}$  and  $G_{clade2}$ ,  $G_{mon}$  and  $G_{dio}$ , and each pair of  $G_{QTP}$ ,  $G_{HM}$ ,  $G_{plain}$  and  $G_{wide}$  from LGM to current and to future. “-” stands for the comparison has opposite sign symbol.

| Comparison                                   | MEAN ENSEMBLE |           |           | MMM ENSEMBLE |           |           | Maxent     |           |           |
|----------------------------------------------|---------------|-----------|-----------|--------------|-----------|-----------|------------|-----------|-----------|
|                                              | $\Delta S$    | $u_{alt}$ | $u_{lat}$ | $\Delta S$   | $u_{alt}$ | $u_{lat}$ | $\Delta S$ | $u_{alt}$ | $u_{lat}$ |
| <i>R. alsia</i> vs <i>R. fastigiata</i>      | 0.999         | 0.627     | -         | 0.996        | -         | 1.000     | -          | 0.584     | < 0.001   |
| <i>R. forrestii</i> vs <i>R. yunnanensis</i> | -             | 0.667     | -         | 0.999        | -         | -         | 0.184      | 0.736     | -         |
| <i>R. henryi</i> vs <i>R. quadrifida</i>     | -             | 0.192     | -         | -            | -         | -         | 0.007      | 0.018     | -         |
| $G_{clade1}$ vs $G_{clade2}$                 | -             | -         | -         | -            | -         | -         | 0.565      | 0.801     | 0.878     |
| $G_{mon}$ vs $G_{dio}$                       | -             | -         | -         | -            | < 0.001   | -         | 0.684      | 0.906     | -         |
| $G_{QTP}$ vs $G_{HM}$                        | -             | -         | -         | -            | -         | -         | -          | 0.383     | -         |
| $G_{QTP}$ vs $G_{wide}$                      | -             | -         | -         | 1.000        | 0.975     | 0.991     | 0.765      | 0.118     | 0.108     |
| $G_{QTP}$ vs $G_{plain}$                     | 0.999         | -         | -         | -            | -         | -         | -          | 0.027     | 0.001     |
| $G_{HM}$ vs $G_{wide}$                       | -             | -         | 0.997     | -            | -         | -         | -          | 0.488     | -         |
| $G_{HM}$ vs $G_{plain}$                      | -             | -         | -         | 0.998        | -         | -         | -          | 0.18      | -         |
| $G_{wide}$ vs $G_{plain}$                    | -             | 0.741     | -         | -            | -         | -         | -          | 0.519     | 0.21      |

**Supplementary Table S14 The 19 bioclimatic variables.** Data collected from the WorldClim Dataset ([www.worldclim.org/bioclیم](http://www.worldclim.org/bioclیم)).

| Code  | Name of variable                                           |
|-------|------------------------------------------------------------|
| BIO1  | Annual Mean Temperature                                    |
| BIO2  | Mean Diurnal Range (Mean of monthly (max temp - min temp)) |
| BIO3  | Isothermality (BIO2/BIO7) (* 100)                          |
| BIO4  | Temperature Seasonality (standard deviation *100)          |
| BIO5  | Max Temperature of Warmest Month                           |
| BIO6  | Min Temperature of Coldest Month                           |
| BIO7  | Temperature Annual Range (BIO5-BIO6)                       |
| BIO8  | Mean Temperature of Wettest Quarter                        |
| BIO9  | Mean Temperature of Driest Quarter                         |
| BIO10 | Mean Temperature of Warmest Quarter                        |
| BIO11 | Mean Temperature of Coldest Quarter                        |
| BIO12 | Annual Precipitation                                       |
| BIO13 | Precipitation of Wettest Month                             |
| BIO14 | Precipitation of Driest Month                              |
| BIO15 | Precipitation Seasonality (Coefficient of Variation)       |
| BIO16 | Precipitation of Wettest Quarter                           |
| BIO17 | Precipitation of Driest Quarter                            |
| BIO18 | Precipitation of Warmest Quarter                           |
| BIO19 | Precipitation of Coldest Quarter                           |

**Supplementary Table S15 The 9 bioclimatic variables with all the VIF values lower than 10 after ten test runs.**

| BIO5 | BIO6    | BIO7    | BIO11   | BIO4    | BIO10   | BIO1    | BIO16  | BIO13  | BIO12  | BIO17 | BIO14 | BIO3  | BIO2  | BIO9  | BIO18 | BIO8  | BIO19 | BIO15 |
|------|---------|---------|---------|---------|---------|---------|--------|--------|--------|-------|-------|-------|-------|-------|-------|-------|-------|-------|
| Inf  | Inf     | Inf     | 8987.83 | 2700.59 | 1948.05 | 1431.19 | 273.84 | 140.18 | 112.98 | 62.29 | 49.58 | 29.76 | 28.09 | 18.14 | 17.63 | 8.83  | 7.37  | 4.47  |
|      | BIO11   | BIO4    | BIO10   | BIO1    | BIO6    | BIO7    | BIO16  | BIO13  | BIO12  | BIO17 | BIO14 | BIO3  | BIO2  | BIO9  | BIO18 | BIO8  | BIO19 | BIO15 |
|      | 8987.83 | 2700.59 | 1948.05 | 1431.19 | 1049.32 | 443.98  | 273.84 | 140.18 | 112.98 | 62.29 | 49.58 | 29.76 | 28.09 | 18.14 | 17.63 | 8.83  | 7.37  | 4.47  |
|      |         | BIO1    | BIO10   | BIO6    | BIO4    | BIO7    | BIO16  | BIO13  | BIO12  | BIO17 | BIO14 | BIO3  | BIO2  | BIO9  | BIO18 | BIO8  | BIO19 | BIO15 |
|      |         | 1033.72 | 1026.10 | 920.03  | 522.74  | 443.97  | 272.80 | 140.17 | 112.22 | 62.24 | 49.31 | 28.04 | 27.75 | 18.07 | 17.57 | 8.68  | 7.26  | 4.30  |
|      |         |         | BIO6    | BIO7    | BIO10   | BIO16   | BIO4   | BIO13  | BIO12  | BIO17 | BIO14 | BIO2  | BIO3  | BIO9  | BIO18 | BIO8  | BIO19 | BIO15 |
|      |         |         | 889.67  | 443.44  | 282.43  | 271.44  | 240.53 | 137.61 | 112.19 | 61.22 | 47.43 | 26.18 | 25.71 | 18.05 | 17.11 | 8.17  | 7.20  | 4.20  |
|      |         |         |         | BIO16   | BIO7    | BIO4    | BIO13  | BIO12  | BIO17  | BIO14 | BIO2  | BIO3  | BIO10 | BIO9  | BIO18 | BIO8  | BIO19 | BIO15 |
|      |         |         |         | 266.10  | 233.23  | 206.77  | 137.26 | 111.64 | 61.17  | 47.39 | 25.86 | 25.54 | 18.20 | 17.31 | 14.75 | 8.16  | 7.18  | 3.70  |
|      |         |         |         |         | BIO7    | BIO4    | BIO17  | BIO12  | BIO14  | BIO13 | BIO2  | BIO3  | BIO10 | BIO9  | BIO18 | BIO8  | BIO19 | BIO15 |
|      |         |         |         |         | 232.20  | 206.12  | 60.14  | 56.35  | 47.39  | 29.54 | 25.86 | 25.53 | 18.19 | 17.29 | 14.39 | 8.14  | 6.99  | 3.69  |
|      |         |         |         |         |         | BIO17   | BIO12  | BIO14  | BIO13  | BIO4  | BIO3  | BIO10 | BIO9  | BIO2  | BIO18 | BIO8  | BIO19 | BIO15 |
|      |         |         |         |         |         | 59.96   | 52.31  | 47.39  | 28.92  | 27.12 | 23.98 | 18.14 | 17.28 | 9.90  | 9.11  | 8.10  | 6.87  | 3.69  |
|      |         |         |         |         |         |         | BIO12  | BIO13  | BIO4   | BIO3  | BIO10 | BIO9  | BIO2  | BIO18 | BIO8  | BIO14 | BIO19 | BIO15 |
|      |         |         |         |         |         |         | 52.07  | 28.85  | 27.10  | 23.89 | 17.88 | 17.27 | 9.85  | 9.06  | 7.78  | 6.78  | 5.97  | 3.60  |
|      |         |         |         |         |         |         |        | BIO4   | BIO3   | BIO10 | BIO9  | BIO2  | BIO8  | BIO13 | BIO14 | BIO18 | BIO19 | BIO15 |
|      |         |         |         |         |         |         |        | 26.69  | 23.89  | 17.85 | 17.20 | 9.85  | 7.78  | 6.49  | 6.31  | 6.02  | 5.59  | 2.99  |
|      |         |         |         |         |         |         |        |        | BIO10  | BIO9  | BIO8  | BIO13 | BIO3  | BIO14 | BIO19 | BIO18 | BIO2  | BIO15 |
|      |         |         |         |         |         |         |        |        | 15.75  | 13.93 | 7.38  | 6.48  | 6.06  | 5.95  | 5.59  | 5.42  | 4.00  | 2.75  |
|      |         |         |         |         |         |         |        |        |        | BIO13 | BIO14 | BIO19 | BIO18 | BIO9  | BIO2  | BIO3  | BIO15 | BIO8  |
|      |         |         |         |         |         |         |        |        |        | 6.43  | 5.92  | 5.57  | 5.42  | 3.44  | 3.22  | 3.20  | 2.73  | 1.92  |

**Supplementary Table S16 Average weights for the ensemble models of *Rhodiola* species and species groups.**

|                            | MAXENT | MGCV  | RF    | GLMSTEP | GBMSTEP | MGCVFIX | GBM   | GLM   | MAHAL | FDA   | EARTH | SVM   | DOMAIN | GAM   | GAMSTEP | NNET  | RPART | SVME  | BIOCLIM |
|----------------------------|--------|-------|-------|---------|---------|---------|-------|-------|-------|-------|-------|-------|--------|-------|---------|-------|-------|-------|---------|
| <i>R. alsia</i>            | 0.143  | 0.107 | 0.143 | 0.071   | 0.071   | 0.072   | 0.071 | 0.000 | 0.071 | 0.107 | 0.071 | 0.071 | 0.000  | 0.000 | 0.000   | 0.000 | 0.000 | 0.000 | 0.000   |
| <i>R. bupleuroides</i>     | 0.124  | 0.124 | 0.123 | 0.057   | 0.123   | 0.090   | 0.090 | 0.123 | 0.000 | 0.091 | 0.000 | 0.056 | 0.000  | 0.000 | 0.000   | 0.000 | 0.000 | 0.000 | 0.000   |
| <i>R. chryanthemifolia</i> | 0.130  | 0.130 | 0.129 | 0.130   | 0.065   | 0.096   | 0.065 | 0.000 | 0.097 | 0.065 | 0.095 | 0.000 | 0.000  | 0.000 | 0.000   | 0.000 | 0.000 | 0.000 | 0.000   |
| <i>R. crenulata</i>        | 0.141  | 0.112 | 0.143 | 0.141   | 0.000   | 0.112   | 0.101 | 0.111 | 0.141 | 0.000 | 0.000 | 0.000 | 0.000  | 0.000 | 0.000   | 0.000 | 0.000 | 0.000 | 0.000   |
| <i>R. dumulosa</i>         | 0.126  | 0.125 | 0.125 | 0.089   | 0.126   | 0.099   | 0.125 | 0.000 | 0.098 | 0.000 | 0.088 | 0.000 | 0.000  | 0.000 | 0.000   | 0.000 | 0.000 | 0.000 | 0.000   |
| <i>R. fastigiata</i>       | 0.126  | 0.126 | 0.124 | 0.126   | 0.067   | 0.126   | 0.102 | 0.090 | 0.056 | 0.058 | 0.000 | 0.000 | 0.000  | 0.000 | 0.000   | 0.000 | 0.000 | 0.000 | 0.000   |
| <i>R. forrestii</i>        | 0.129  | 0.129 | 0.097 | 0.097   | 0.097   | 0.065   | 0.097 | 0.000 | 0.129 | 0.097 | 0.000 | 0.000 | 0.065  | 0.000 | 0.000   | 0.000 | 0.000 | 0.000 | 0.000   |
| <i>R. henryi</i>           | 0.130  | 0.130 | 0.097 | 0.129   | 0.097   | 0.065   | 0.097 | 0.065 | 0.065 | 0.062 | 0.000 | 0.064 | 0.000  | 0.000 | 0.000   | 0.000 | 0.000 | 0.000 | 0.000   |
| <i>R. himalensis</i>       | 0.104  | 0.104 | 0.107 | 0.075   | 0.103   | 0.078   | 0.102 | 0.000 | 0.098 | 0.076 | 0.077 | 0.077 | 0.000  | 0.000 | 0.000   | 0.000 | 0.000 | 0.000 | 0.000   |
| <i>R. kirilowii</i>        | 0.135  | 0.101 | 0.134 | 0.096   | 0.102   | 0.069   | 0.101 | 0.000 | 0.067 | 0.000 | 0.097 | 0.099 | 0.000  | 0.000 | 0.000   | 0.000 | 0.000 | 0.000 | 0.000   |
| <i>R. quadrifida</i>       | 0.125  | 0.090 | 0.091 | 0.122   | 0.092   | 0.121   | 0.093 | 0.000 | 0.087 | 0.057 | 0.055 | 0.067 | 0.000  | 0.000 | 0.000   | 0.000 | 0.000 | 0.000 | 0.000   |
| <i>R. sacra</i>            | 0.104  | 0.138 | 0.104 | 0.138   | 0.069   | 0.104   | 0.103 | 0.000 | 0.103 | 0.000 | 0.138 | 0.000 | 0.000  | 0.000 | 0.000   | 0.000 | 0.000 | 0.000 | 0.000   |
| <i>R. wallichiana</i>      | 0.134  | 0.098 | 0.099 | 0.098   | 0.072   | 0.063   | 0.072 | 0.063 | 0.000 | 0.071 | 0.000 | 0.000 | 0.000  | 0.101 | 0.066   | 0.063 | 0.000 | 0.000 | 0.000   |
| <i>R. yunnanensis</i>      | 0.117  | 0.116 | 0.115 | 0.116   | 0.056   | 0.083   | 0.056 | 0.083 | 0.117 | 0.083 | 0.000 | 0.000 | 0.060  | 0.000 | 0.000   | 0.000 | 0.000 | 0.000 | 0.000   |
| G <sub>clade1</sub>        | 0.129  | 0.128 | 0.085 | 0.127   | 0.120   | 0.000   | 0.101 | 0.062 | 0.000 | 0.127 | 0.121 | 0.000 | 0.000  | 0.000 | 0.000   | 0.000 | 0.000 | 0.000 | 0.000   |
| G <sub>clade2</sub>        | 0.097  | 0.129 | 0.130 | 0.129   | 0.129   | 0.129   | 0.096 | 0.097 | 0.000 | 0.000 | 0.064 | 0.000 | 0.000  | 0.000 | 0.000   | 0.000 | 0.000 | 0.000 | 0.000   |
| G <sub>mon</sub>           | 0.121  | 0.119 | 0.121 | 0.087   | 0.122   | 0.117   | 0.087 | 0.064 | 0.000 | 0.053 | 0.055 | 0.055 | 0.000  | 0.000 | 0.000   | 0.000 | 0.000 | 0.000 | 0.000   |
| G <sub>dio</sub>           | 0.119  | 0.120 | 0.120 | 0.120   | 0.120   | 0.120   | 0.054 | 0.120 | 0.000 | 0.053 | 0.000 | 0.054 | 0.000  | 0.000 | 0.000   | 0.000 | 0.000 | 0.000 | 0.000   |
| G <sub>QTP</sub>           | 0.129  | 0.129 | 0.129 | 0.097   | 0.129   | 0.129   | 0.129 | 0.129 | 0.000 | 0.000 | 0.000 | 0.000 | 0.000  | 0.000 | 0.000   | 0.000 | 0.000 | 0.000 | 0.000   |
| G <sub>HM</sub>            | 0.129  | 0.129 | 0.099 | 0.129   | 0.099   | 0.129   | 0.000 | 0.129 | 0.096 | 0.063 | 0.000 | 0.000 | 0.000  | 0.000 | 0.000   | 0.000 | 0.000 | 0.000 | 0.000   |
| G <sub>wide</sub>          | 0.136  | 0.134 | 0.136 | 0.133   | 0.132   | 0.133   | 0.106 | 0.000 | 0.000 | 0.000 | 0.090 | 0.000 | 0.000  | 0.000 | 0.000   | 0.000 | 0.000 | 0.000 | 0.000   |
| G <sub>plain</sub>         | 0.130  | 0.130 | 0.097 | 0.129   | 0.097   | 0.065   | 0.097 | 0.065 | 0.065 | 0.062 | 0.000 | 0.064 | 0.000  | 0.000 | 0.000   | 0.000 | 0.000 | 0.000 | 0.000   |
| WHOLE                      | 0.129  | 0.129 | 0.130 | 0.129   | 0.129   | 0.129   | 0.064 | 0.097 | 0.000 | 0.000 | 0.000 | 0.064 | 0.000  | 0.000 | 0.000   | 0.000 | 0.000 | 0.000 | 0.000   |
| Average                    | 0.125  | 0.121 | 0.116 | 0.111   | 0.096   | 0.095   | 0.087 | 0.056 | 0.056 | 0.049 | 0.041 | 0.029 | 0.005  | 0.004 | 0.003   | 0.003 | 0.000 | 0.000 | 0.000   |

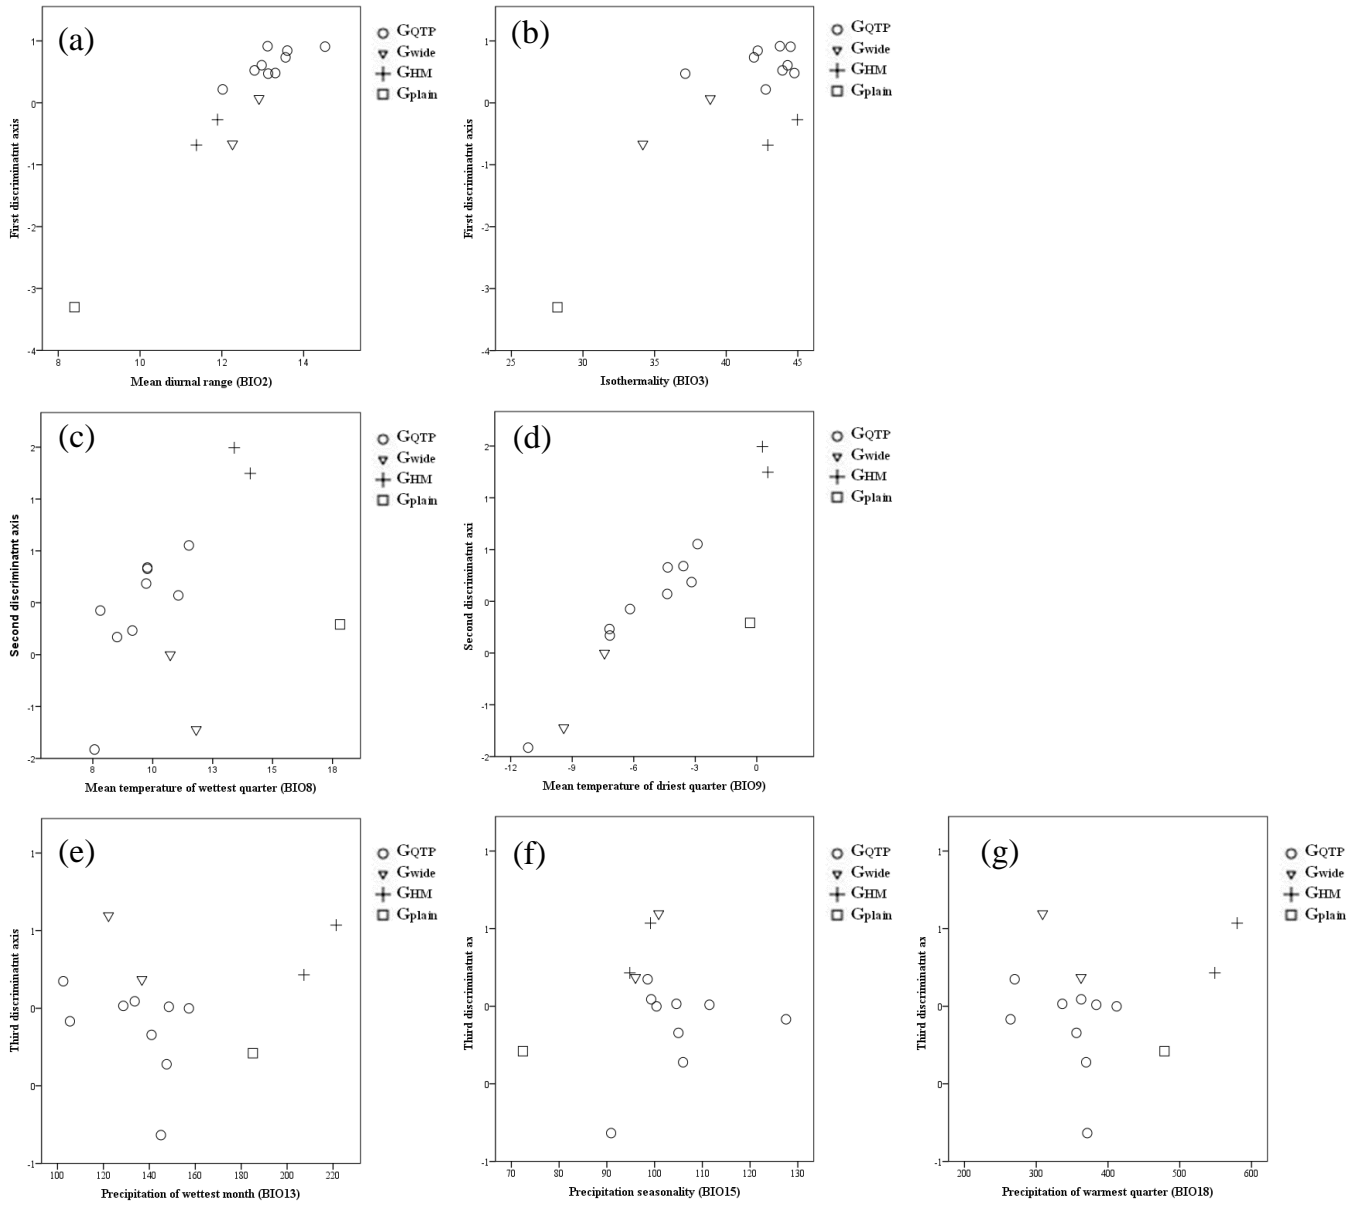

**Supplementary Fig. S1. Mean species CDA scores versus bioclimatic variable plots.** The relationship between (a) the first discriminant axis and mean diurnal range (BIO2), (b) the first discriminant axis and isothermality (BIO3), (c) the second discriminant axis and mean temperature of wettest quarter (BIO8), (d) the second discriminant axis and mean temperature of driest quarter (BIO9), (e) the third discriminant axis and precipitation of wettest month (BIO13), (f) the third discriminant axis and precipitation seasonality (BIO15), (g) the third discriminant axis and precipitation of warmest quarter (BIO18) for G<sub>QTP</sub> (○), G<sub>wide</sub> (▽), G<sub>HM</sub> (⊕) and G<sub>plain</sub> (□).

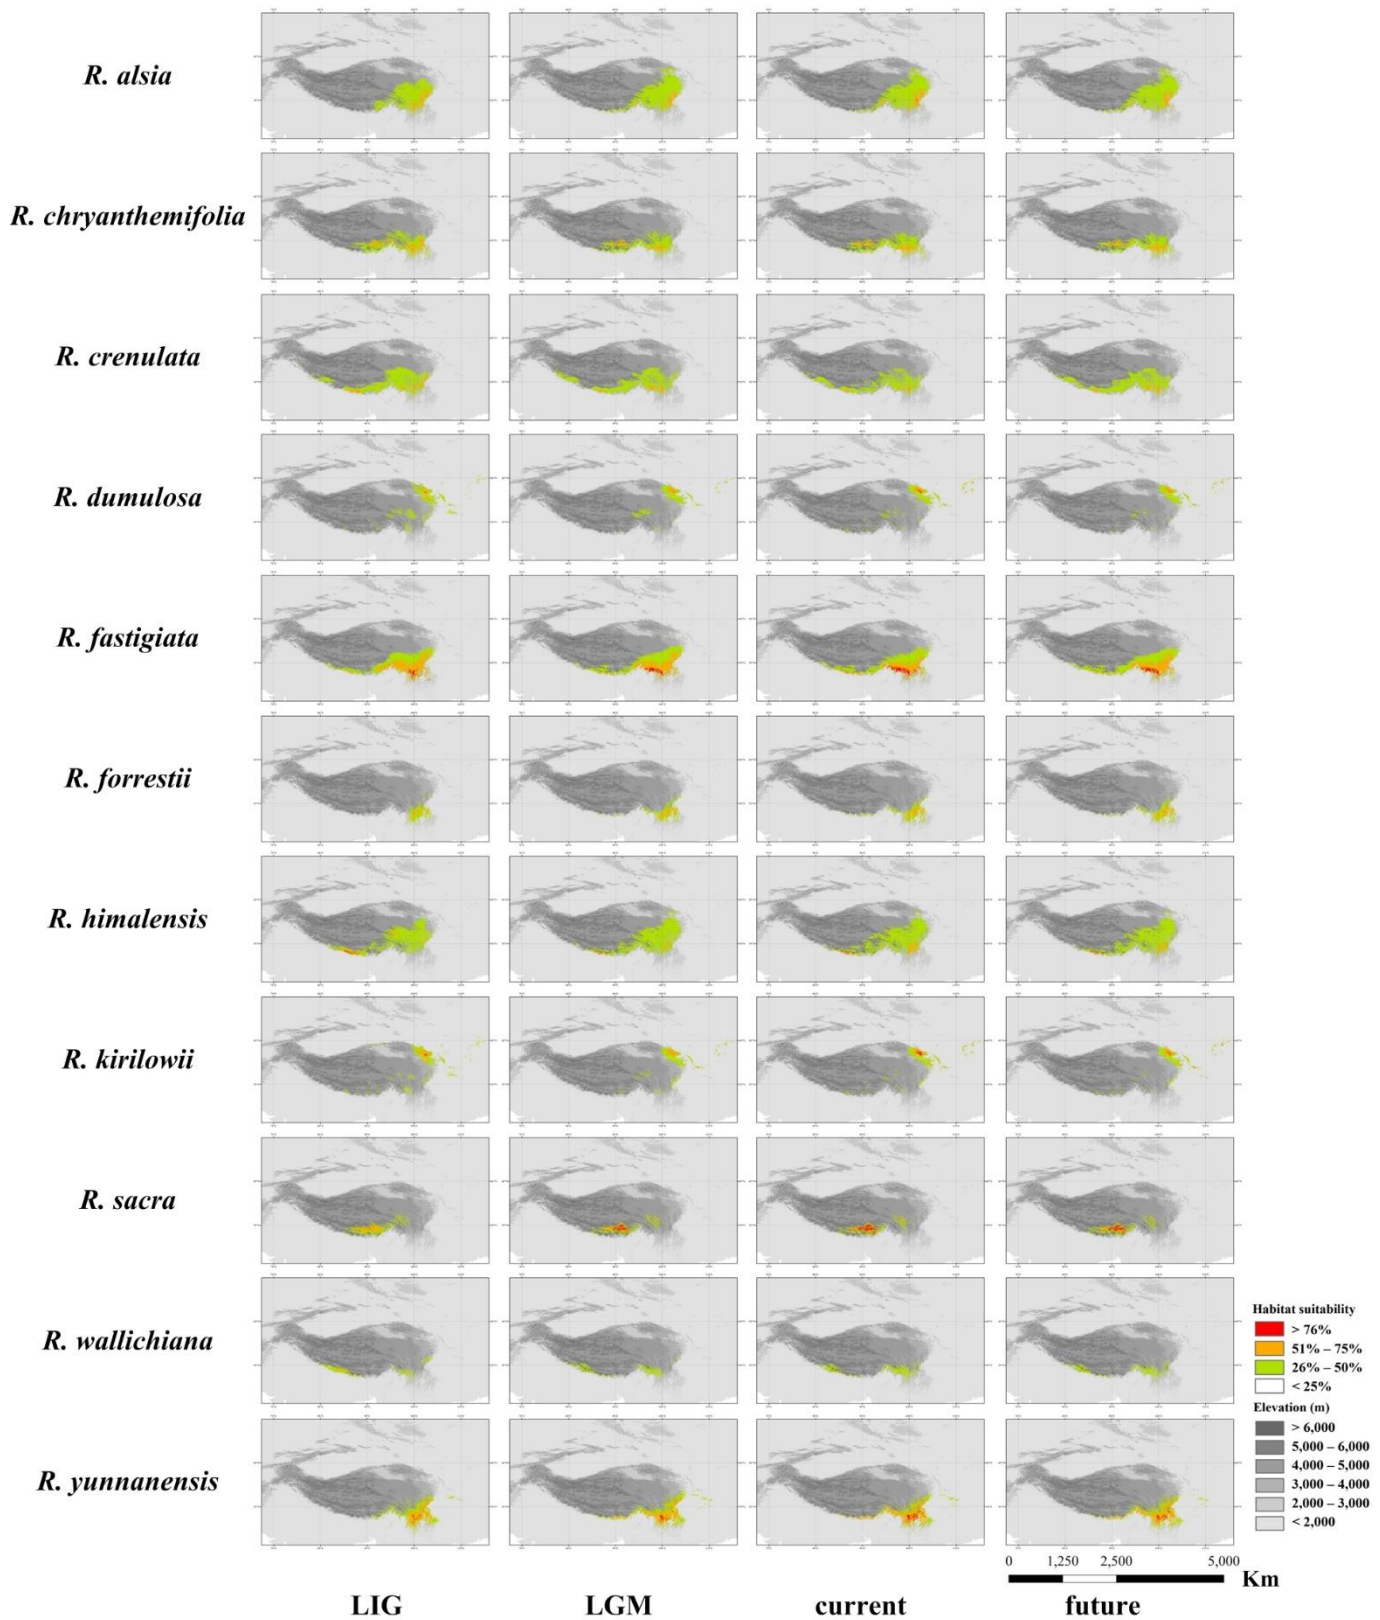

Supplementary Fig. S2 MEAN ENSEMBLE predicted maps for *Rhodiola* species and species group (except for those showed in Fig. 3) for the period LIG, LGM, current and future (2050). ENM predicted results were processed by ArcGIS ver 10.2 (ESRI, Redlands, California, USA) (<http://www.esri.com/>), and then integrated using Microsoft Office Visio 2013 (<http://office.microsoft.com/visio/>).



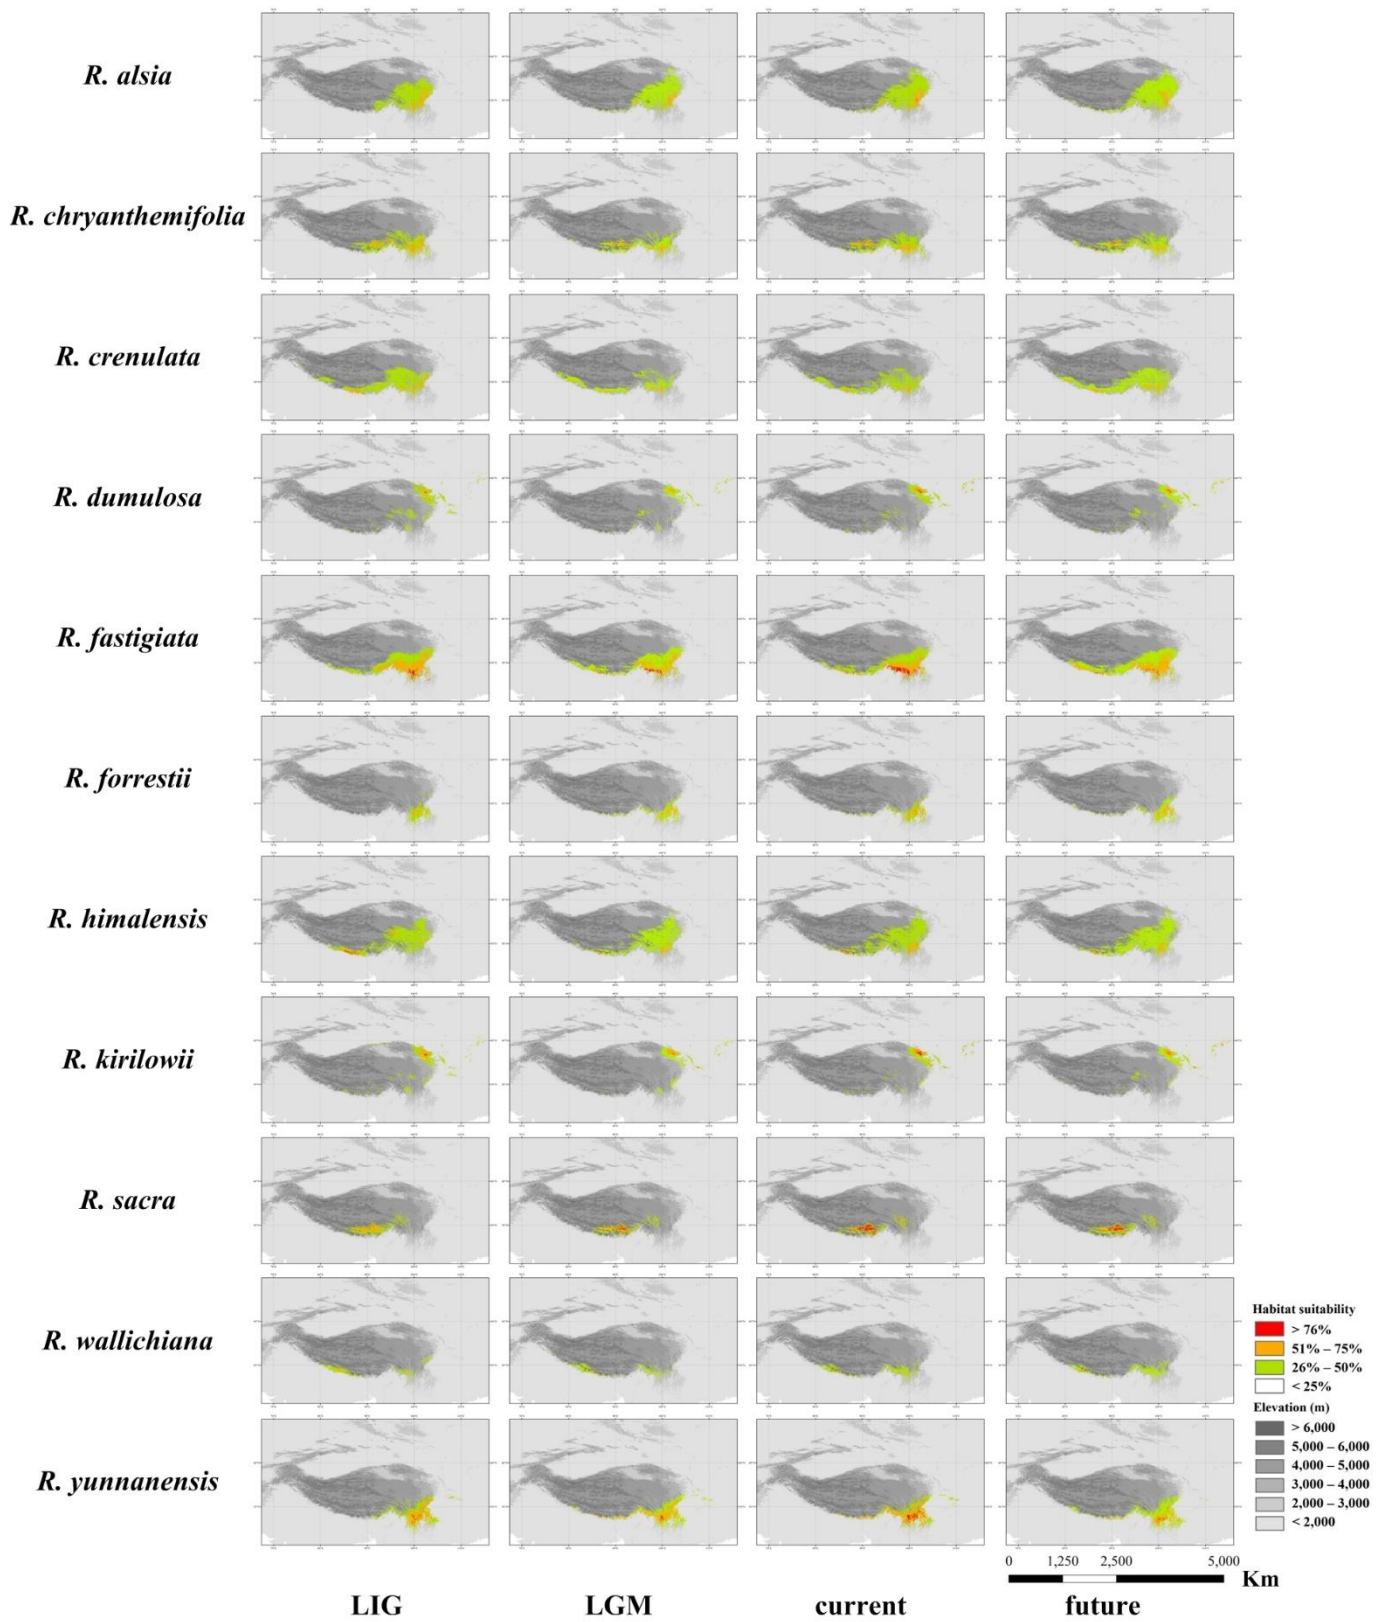

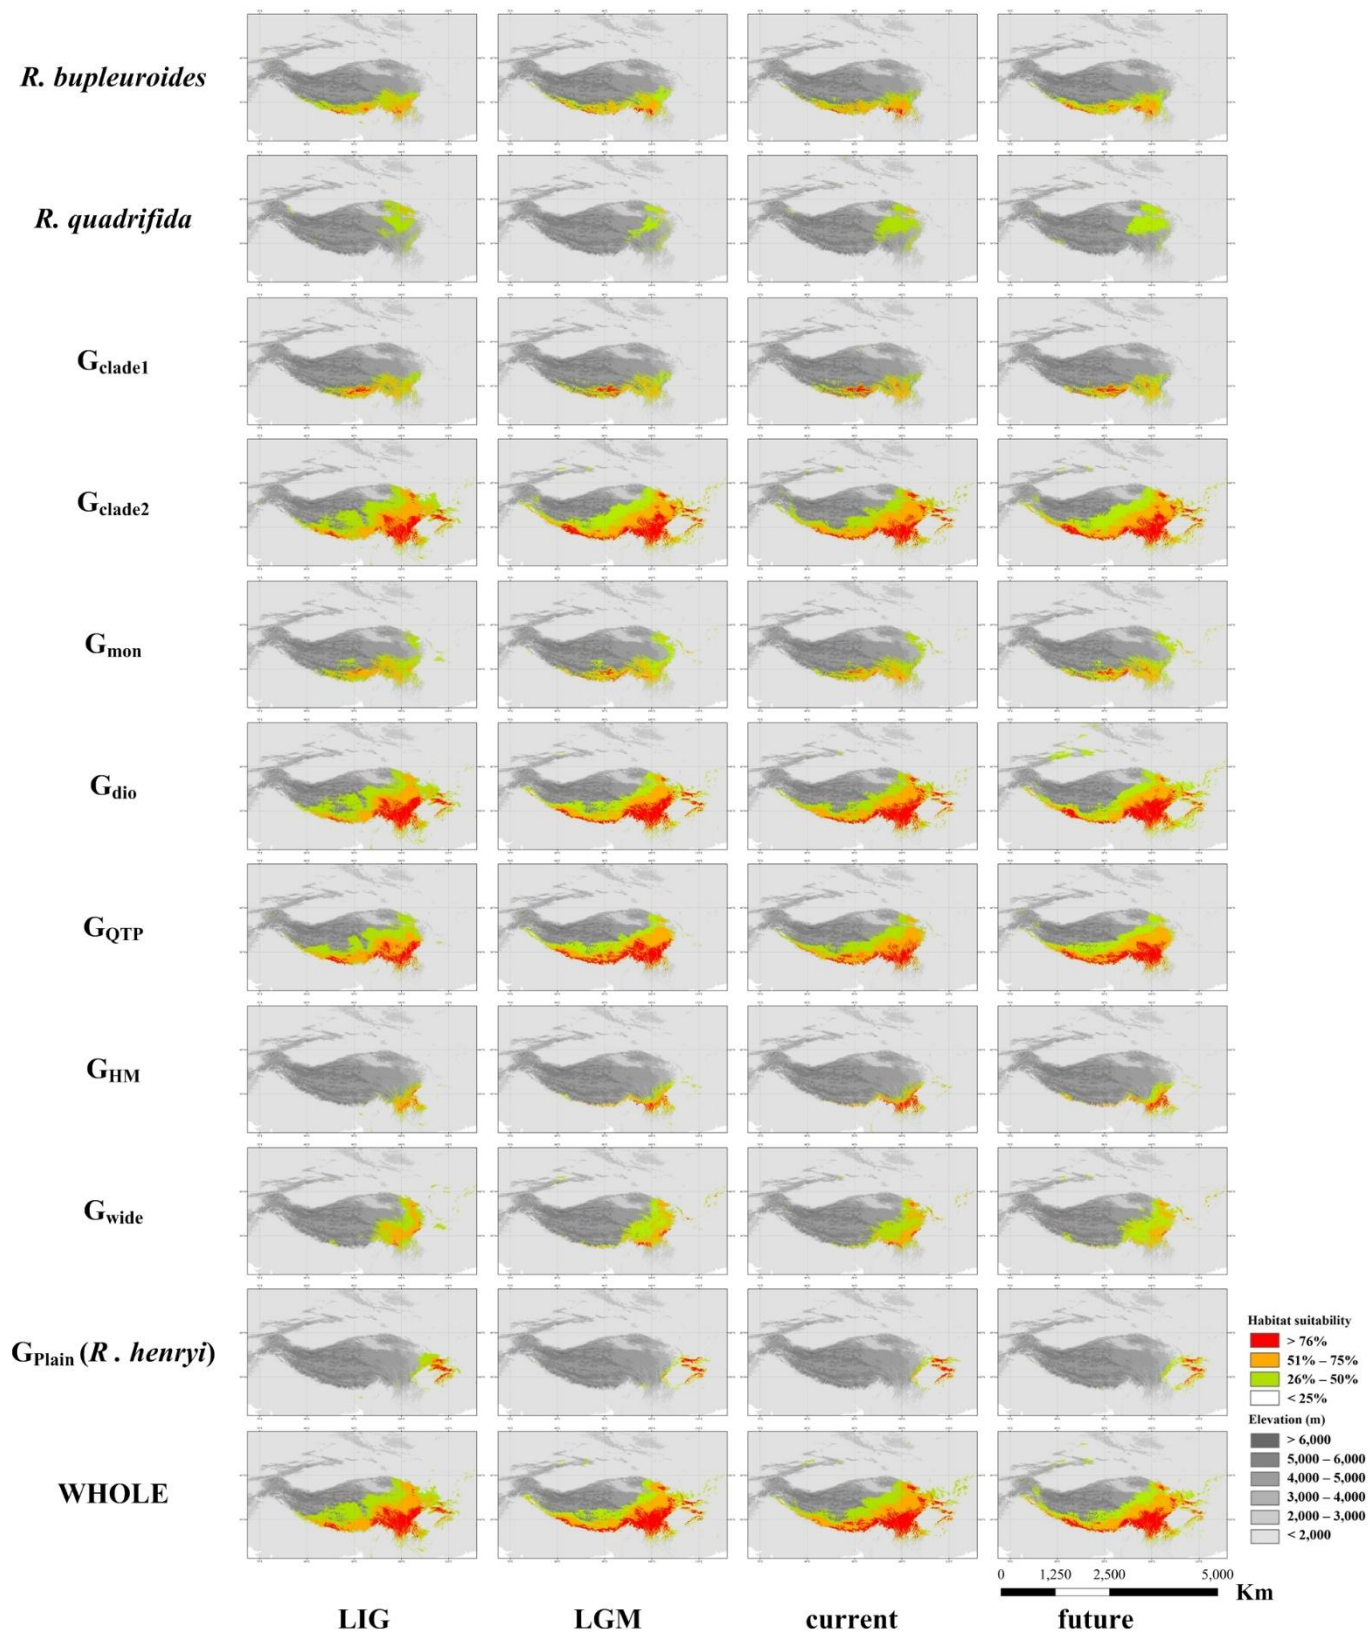

Supplementary Fig. S3 MMM ENSEMBLE predicted maps for each *Rhodiola* species and species group for the period LIG, LGM, current and future (2050). ENM predicted results were processed by ArcGIS ver 10.2 (ESRI, Redlands, California, USA) (<http://www.esri.com/>), and then integrated using Microsoft Office Visio 2013 (<http://office.microsoft.com/visio/>).

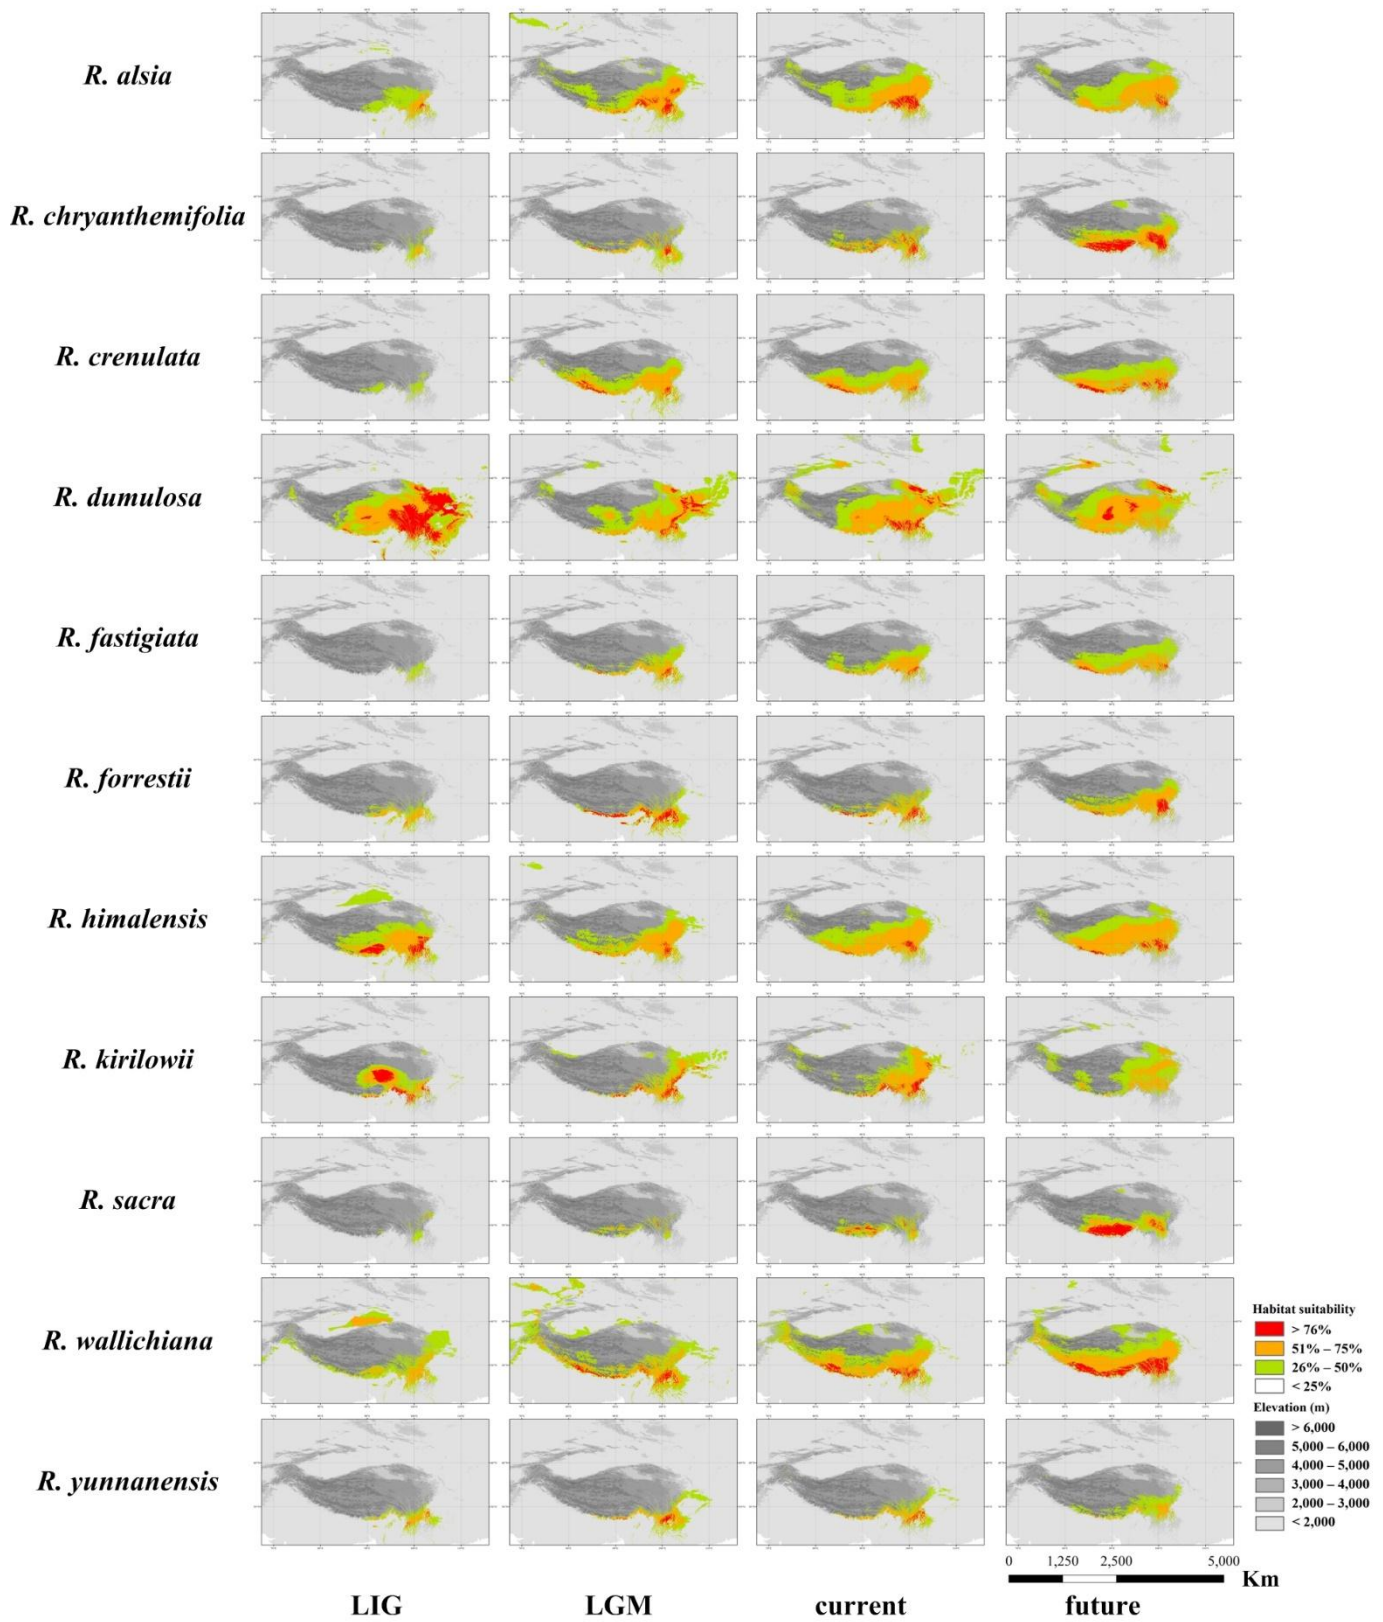



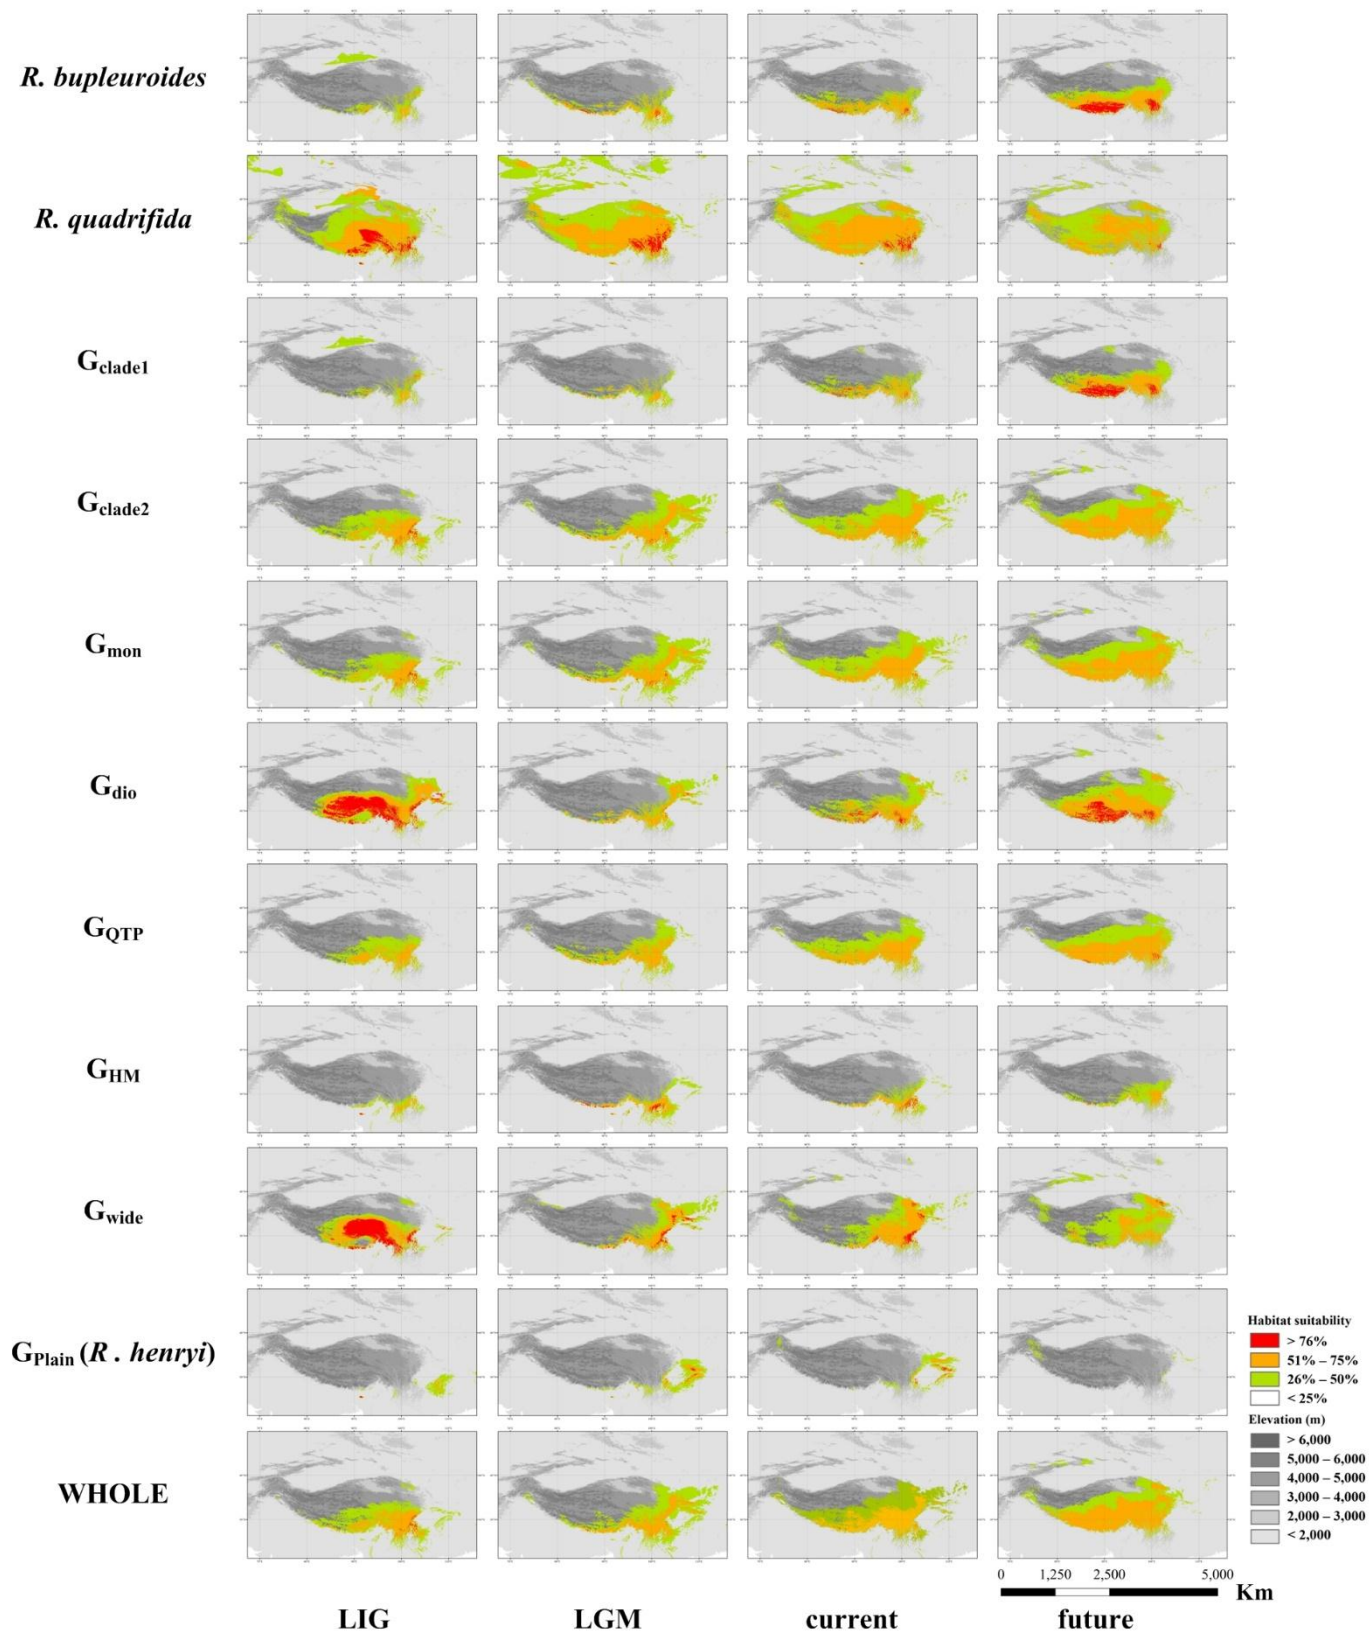

Supplementary Fig. S4 Maxent predicted maps for each *Rhodiola* species and species group for the period LIG, LGM, current and future (2050). ENM predicted results were processed by ArcGIS ver 10.2 (ESRI, Redlands, California, USA) (<http://www.esri.com/>), and then integrated using Microsoft Office Visio 2013 (<http://office.microsoft.com/visio/>).

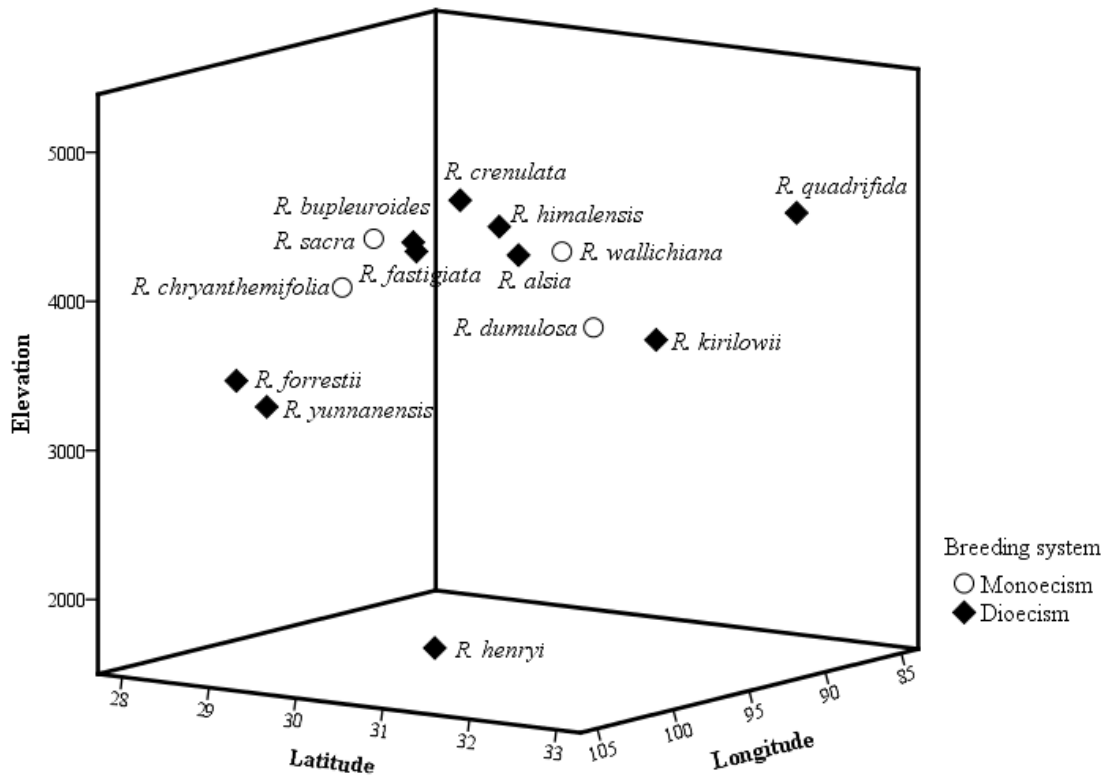

**Supplementary Fig. S5.** Mean elevation, latitude and longitude of 14 *Rhodiola* species that well modelled. “○” represents monoecism and “◆” represents dioecism.

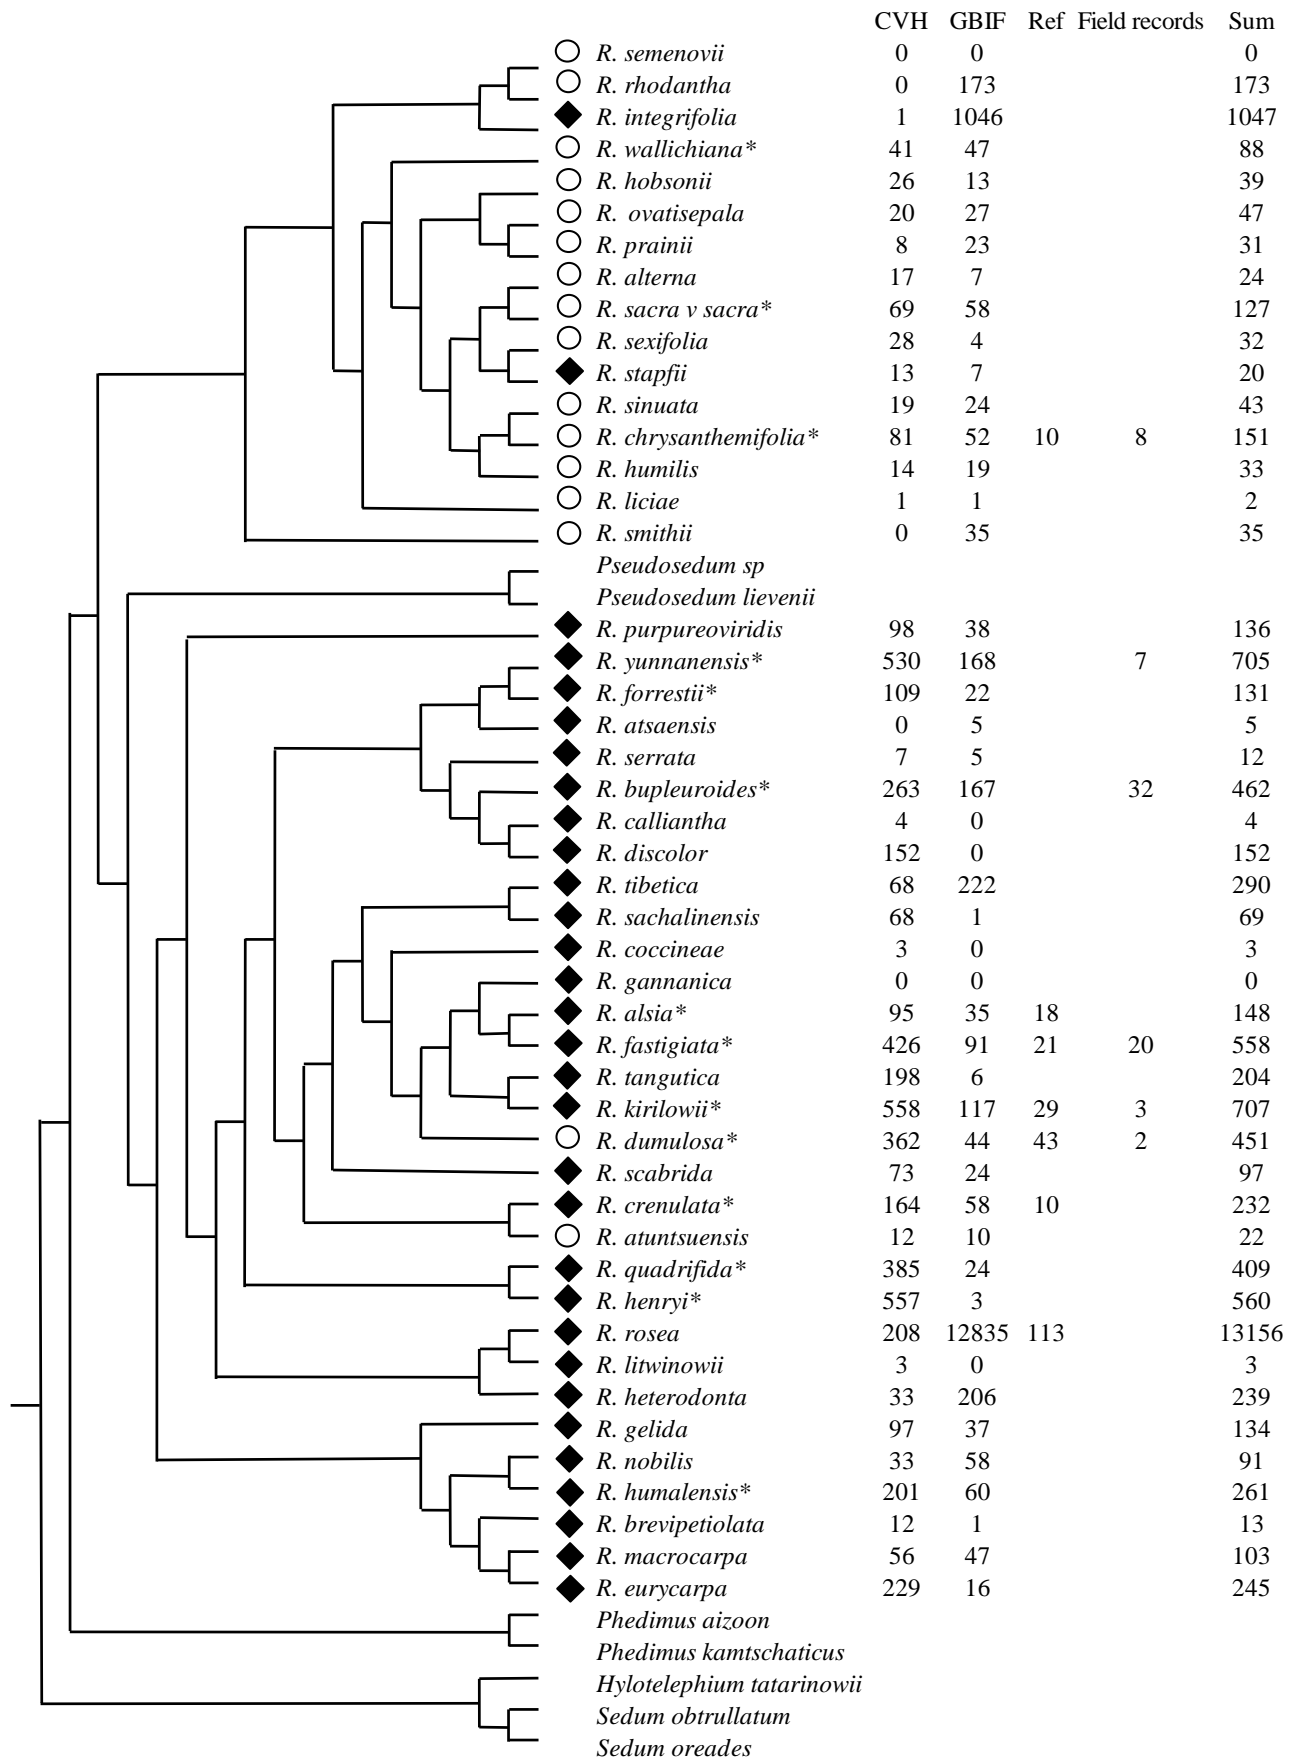

Supplementary Fig. S6. Phylogenetic tree of the genus *Rhodiola* modified from Zhang *et al.*<sup>1</sup> and the records of *Rhodiola* species. Including records from online herbarium, references and our field records. (\*, the species used for ENM;

○, monoecism; ◆, dioecism)

**Standard deviations of multi-GCMs in LGM:**

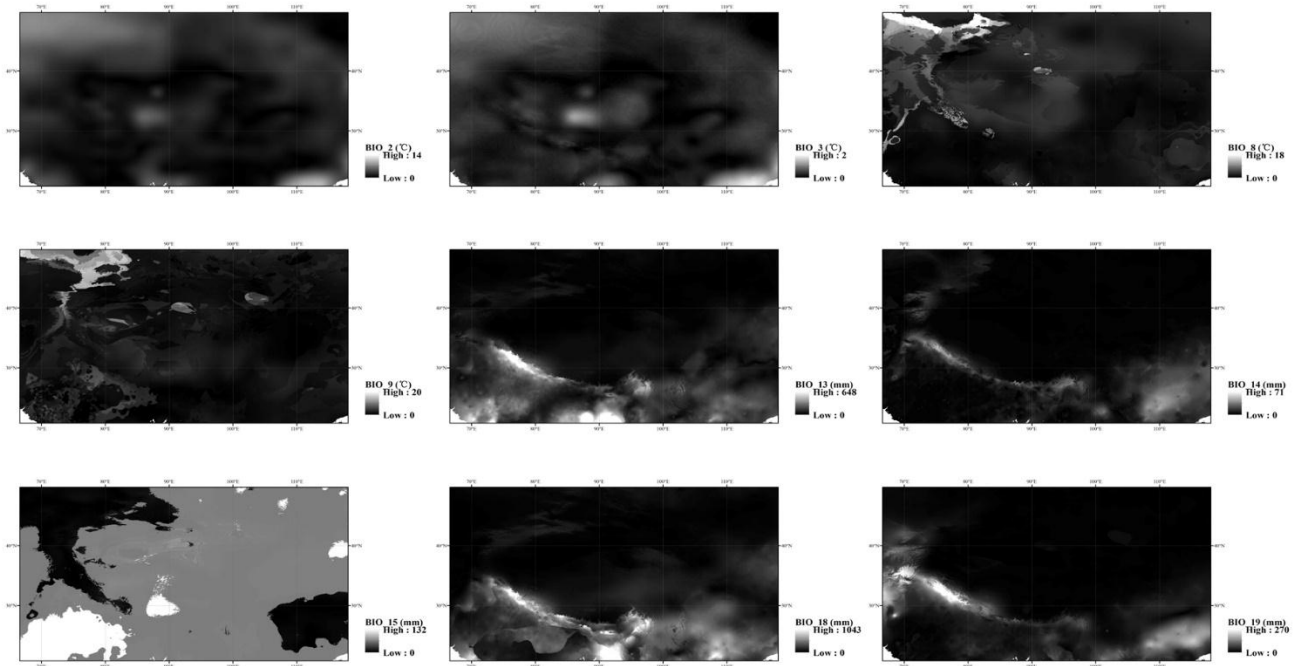

**Standard deviations of multi-GCMs in 2050:**

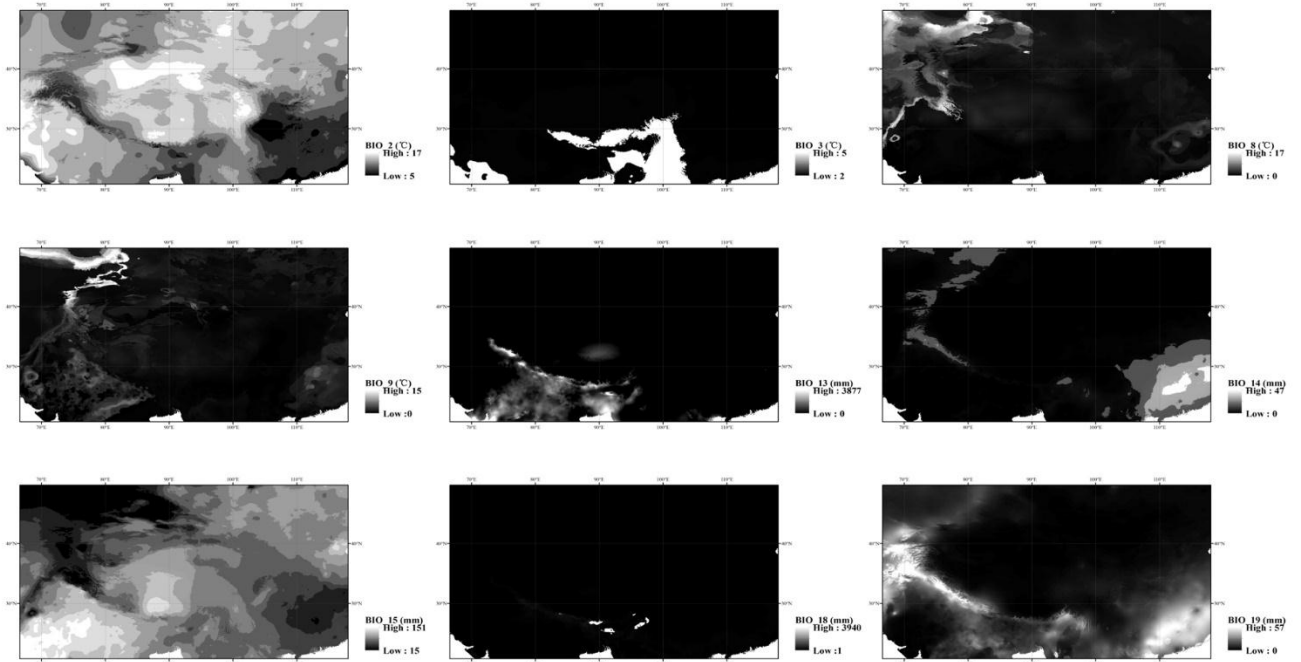

**Supplementary Fig. S7. Standard deviations of multi-GCMs in LGM and 2050 for 9 climate variables used in this study.**

**Supplementary Material1 *Rhodiola* records** (Occurrence record data derived from our own field expeditions, from on-line herbarium databases (Global Biodiversity Information Facility Data Portal, GBIF: [www.gbif.org](http://www.gbif.org); Chinese Virtual Herbarium Data Portal, CVH: [www.cvh.org.cn](http://www.cvh.org.cn)) and from published research<sup>2-11</sup>)

| species         | longitude | latitude |
|-----------------|-----------|----------|
| <i>R. alsia</i> | 100.16    | 27.10    |
| <i>R. alsia</i> | 91.96     | 27.99    |
| <i>R. alsia</i> | 99.10     | 28.31    |
| <i>R. alsia</i> | 99.00     | 28.38    |
| <i>R. alsia</i> | 85.30     | 28.55    |
| <i>R. alsia</i> | 99.82     | 28.57    |
| <i>R. alsia</i> | 92.50     | 28.58    |
| <i>R. alsia</i> | 99.85     | 28.59    |
| <i>R. alsia</i> | 93.95     | 29.00    |
| <i>R. alsia</i> | 92.35     | 29.02    |
| <i>R. alsia</i> | 93.95     | 29.05    |
| <i>R. alsia</i> | 93.98     | 29.05    |
| <i>R. alsia</i> | 100.02    | 29.13    |
| <i>R. alsia</i> | 100.94    | 29.55    |
| <i>R. alsia</i> | 95.00     | 29.58    |
| <i>R. alsia</i> | 94.58     | 29.62    |
| <i>R. alsia</i> | 94.68     | 29.62    |
| <i>R. alsia</i> | 94.72     | 29.68    |
| <i>R. alsia</i> | 95.69     | 29.74    |
| <i>R. alsia</i> | 92.28     | 29.87    |
| <i>R. alsia</i> | 94.87     | 29.90    |
| <i>R. alsia</i> | 102.28    | 29.91    |
| <i>R. alsia</i> | 101.33    | 30.05    |
| <i>R. alsia</i> | 101.97    | 30.06    |
| <i>R. alsia</i> | 101.40    | 30.07    |
| <i>R. alsia</i> | 101.80    | 30.07    |
| <i>R. alsia</i> | 101.81    | 30.08    |
| <i>R. alsia</i> | 96.88     | 30.09    |
| <i>R. alsia</i> | 100.67    | 30.15    |
| <i>R. alsia</i> | 101.82    | 30.15    |
| <i>R. alsia</i> | 102.32    | 30.21    |
| <i>R. alsia</i> | 99.55     | 30.33    |
| <i>R. alsia</i> | 102.82    | 30.52    |
| <i>R. alsia</i> | 101.27    | 31.02    |
| <i>R. alsia</i> | 102.14    | 31.16    |
| <i>R. alsia</i> | 97.33     | 31.28    |
| <i>R. alsia</i> | 95.63     | 31.45    |
| <i>R. alsia</i> | 100.76    | 31.57    |
| <i>R. alsia</i> | 101.45    | 31.61    |
| <i>R. alsia</i> | 98.82     | 31.65    |
| <i>R. alsia</i> | 103.93    | 31.65    |
| <i>R. alsia</i> | 94.92     | 31.68    |
| <i>R. alsia</i> | 102.67    | 31.85    |
| <i>R. alsia</i> | 102.67    | 31.87    |
| <i>R. alsia</i> | 98.90     | 31.93    |



|                        |        |       |
|------------------------|--------|-------|
| <i>R. alsia</i>        | 102.65 | 31.95 |
| <i>R. alsia</i>        | 100.22 | 32.05 |
| <i>R. alsia</i>        | 102.38 | 32.44 |
| <i>R. alsia</i>        | 103.60 | 32.64 |
| <i>R. alsia</i>        | 104.33 | 32.74 |
| <i>R. alsia</i>        | 97.01  | 33.02 |
| <i>R. alsia</i>        | 97.55  | 33.13 |
| <i>R. alsia</i>        | 97.43  | 33.20 |
| <i>R. alsia</i>        | 100.38 | 33.28 |
| <i>R. alsia</i>        | 100.27 | 33.40 |
| <i>R. alsia</i>        | 103.61 | 33.64 |
| <i>R. alsia</i>        | 99.70  | 33.79 |
| <i>R. alsia</i>        | 97.62  | 34.08 |
| <i>R. alsia</i>        | 97.97  | 34.28 |
| <i>R. alsia</i>        | 98.12  | 34.45 |
| <i>R. alsia</i>        | 99.67  | 34.57 |
| <i>R. alsia</i>        | 100.82 | 34.71 |
| <i>R. alsia</i>        | 98.47  | 34.87 |
| <i>R. alsia</i>        | 99.69  | 35.24 |
| <i>R. alsia</i>        | 94.56  | 35.88 |
| <i>R. alsia</i>        | 101.70 | 36.49 |
| <i>R. alsia</i>        | 100.47 | 36.55 |
| <i>R. alsia</i>        | 99.51  | 37.04 |
| <i>R. alsia</i>        | 101.81 | 37.05 |
| <i>R. alsia</i>        | 101.41 | 37.25 |
| <i>R. alsia</i>        | 102.86 | 37.26 |
| <i>R. bupleuroides</i> | 102.91 | 26.24 |
| <i>R. bupleuroides</i> | 98.97  | 26.42 |
| <i>R. bupleuroides</i> | 99.02  | 26.59 |
| <i>R. bupleuroides</i> | 100.23 | 26.88 |
| <i>R. bupleuroides</i> | 99.05  | 27.03 |
| <i>R. bupleuroides</i> | 100.24 | 27.04 |
| <i>R. bupleuroides</i> | 100.22 | 27.11 |
| <i>R. bupleuroides</i> | 100.67 | 27.18 |
| <i>R. bupleuroides</i> | 98.69  | 27.20 |
| <i>R. bupleuroides</i> | 98.70  | 27.21 |
| <i>R. bupleuroides</i> | 98.72  | 27.21 |
| <i>R. bupleuroides</i> | 98.71  | 27.22 |
| <i>R. bupleuroides</i> | 100.13 | 27.37 |
| <i>R. bupleuroides</i> | 88.91  | 27.39 |
| <i>R. bupleuroides</i> | 88.93  | 27.42 |
| <i>R. bupleuroides</i> | 99.88  | 27.48 |
| <i>R. bupleuroides</i> | 88.98  | 27.51 |
| <i>R. bupleuroides</i> | 88.88  | 27.52 |
| <i>R. bupleuroides</i> | 100.67 | 27.55 |
| <i>R. bupleuroides</i> | 98.96  | 27.58 |
| <i>R. bupleuroides</i> | 99.78  | 27.60 |
| <i>R. bupleuroides</i> | 98.91  | 27.61 |
| <i>R. bupleuroides</i> | 99.81  | 27.62 |

|                        |        |       |
|------------------------|--------|-------|
| <i>R. bupleuroides</i> | 99.14  | 27.68 |
| <i>R. bupleuroides</i> | 88.75  | 27.72 |
| <i>R. bupleuroides</i> | 89.16  | 27.72 |
| <i>R. bupleuroides</i> | 100.05 | 27.74 |
| <i>R. bupleuroides</i> | 99.59  | 27.80 |
| <i>R. bupleuroides</i> | 86.77  | 27.83 |
| <i>R. bupleuroides</i> | 99.99  | 27.83 |
| <i>R. bupleuroides</i> | 91.79  | 27.88 |
| <i>R. bupleuroides</i> | 86.80  | 27.92 |
| <i>R. bupleuroides</i> | 88.59  | 27.93 |
| <i>R. bupleuroides</i> | 85.98  | 27.94 |
| <i>R. bupleuroides</i> | 86.61  | 27.94 |
| <i>R. bupleuroides</i> | 91.86  | 27.95 |
| <i>R. bupleuroides</i> | 87.13  | 27.98 |
| <i>R. bupleuroides</i> | 87.67  | 27.98 |
| <i>R. bupleuroides</i> | 99.62  | 27.98 |
| <i>R. bupleuroides</i> | 85.88  | 27.99 |
| <i>R. bupleuroides</i> | 85.99  | 27.99 |
| <i>R. bupleuroides</i> | 98.48  | 27.99 |
| <i>R. bupleuroides</i> | 87.68  | 28.01 |
| <i>R. bupleuroides</i> | 85.99  | 28.02 |
| <i>R. bupleuroides</i> | 87.68  | 28.02 |
| <i>R. bupleuroides</i> | 86.00  | 28.03 |
| <i>R. bupleuroides</i> | 85.44  | 28.04 |
| <i>R. bupleuroides</i> | 91.94  | 28.06 |
| <i>R. bupleuroides</i> | 101.31 | 28.06 |
| <i>R. bupleuroides</i> | 92.36  | 28.07 |
| <i>R. bupleuroides</i> | 89.04  | 28.11 |
| <i>R. bupleuroides</i> | 99.83  | 28.13 |
| <i>R. bupleuroides</i> | 86.85  | 28.15 |
| <i>R. bupleuroides</i> | 99.94  | 28.16 |
| <i>R. bupleuroides</i> | 86.84  | 28.17 |
| <i>R. bupleuroides</i> | 86.84  | 28.18 |
| <i>R. bupleuroides</i> | 87.19  | 28.18 |
| <i>R. bupleuroides</i> | 91.96  | 28.18 |
| <i>R. bupleuroides</i> | 86.82  | 28.20 |
| <i>R. bupleuroides</i> | 87.18  | 28.20 |
| <i>R. bupleuroides</i> | 85.57  | 28.22 |
| <i>R. bupleuroides</i> | 92.27  | 28.24 |
| <i>R. bupleuroides</i> | 86.82  | 28.25 |
| <i>R. bupleuroides</i> | 86.81  | 28.27 |
| <i>R. bupleuroides</i> | 86.82  | 28.29 |
| <i>R. bupleuroides</i> | 86.83  | 28.30 |
| <i>R. bupleuroides</i> | 99.15  | 28.31 |
| <i>R. bupleuroides</i> | 92.91  | 28.34 |
| <i>R. bupleuroides</i> | 98.99  | 28.34 |
| <i>R. bupleuroides</i> | 99.05  | 28.35 |
| <i>R. bupleuroides</i> | 85.36  | 28.39 |
| <i>R. bupleuroides</i> | 87.74  | 28.40 |

|                        |        |       |
|------------------------|--------|-------|
| <i>R. bupleuroides</i> | 98.96  | 28.40 |
| <i>R. bupleuroides</i> | 98.96  | 28.41 |
| <i>R. bupleuroides</i> | 98.94  | 28.42 |
| <i>R. bupleuroides</i> | 85.30  | 28.43 |
| <i>R. bupleuroides</i> | 92.89  | 28.53 |
| <i>R. bupleuroides</i> | 98.91  | 28.54 |
| <i>R. bupleuroides</i> | 99.85  | 28.59 |
| <i>R. bupleuroides</i> | 99.84  | 28.60 |
| <i>R. bupleuroides</i> | 98.90  | 28.61 |
| <i>R. bupleuroides</i> | 84.98  | 28.65 |
| <i>R. bupleuroides</i> | 87.19  | 28.65 |
| <i>R. bupleuroides</i> | 98.94  | 28.66 |
| <i>R. bupleuroides</i> | 83.98  | 28.68 |
| <i>R. bupleuroides</i> | 98.78  | 28.69 |
| <i>R. bupleuroides</i> | 83.67  | 28.72 |
| <i>R. bupleuroides</i> | 99.20  | 28.73 |
| <i>R. bupleuroides</i> | 97.37  | 28.74 |
| <i>R. bupleuroides</i> | 99.22  | 28.82 |
| <i>R. bupleuroides</i> | 85.42  | 28.90 |
| <i>R. bupleuroides</i> | 100.28 | 28.92 |
| <i>R. bupleuroides</i> | 83.78  | 28.93 |
| <i>R. bupleuroides</i> | 93.23  | 28.93 |
| <i>R. bupleuroides</i> | 99.76  | 28.93 |
| <i>R. bupleuroides</i> | 91.09  | 28.94 |
| <i>R. bupleuroides</i> | 99.75  | 28.95 |
| <i>R. bupleuroides</i> | 93.90  | 29.03 |
| <i>R. bupleuroides</i> | 87.53  | 29.04 |
| <i>R. bupleuroides</i> | 100.30 | 29.04 |
| <i>R. bupleuroides</i> | 87.56  | 29.07 |
| <i>R. bupleuroides</i> | 97.28  | 29.08 |
| <i>R. bupleuroides</i> | 100.25 | 29.08 |
| <i>R. bupleuroides</i> | 93.44  | 29.09 |
| <i>R. bupleuroides</i> | 100.00 | 29.12 |
| <i>R. bupleuroides</i> | 100.04 | 29.13 |
| <i>R. bupleuroides</i> | 97.21  | 29.17 |
| <i>R. bupleuroides</i> | 90.63  | 29.21 |
| <i>R. bupleuroides</i> | 100.14 | 29.21 |
| <i>R. bupleuroides</i> | 94.28  | 29.23 |
| <i>R. bupleuroides</i> | 97.10  | 29.23 |
| <i>R. bupleuroides</i> | 88.88  | 29.26 |
| <i>R. bupleuroides</i> | 100.08 | 29.27 |
| <i>R. bupleuroides</i> | 92.12  | 29.28 |
| <i>R. bupleuroides</i> | 91.74  | 29.30 |
| <i>R. bupleuroides</i> | 91.98  | 29.30 |
| <i>R. bupleuroides</i> | 88.92  | 29.31 |
| <i>R. bupleuroides</i> | 89.71  | 29.32 |
| <i>R. bupleuroides</i> | 98.13  | 29.36 |
| <i>R. bupleuroides</i> | 96.71  | 29.47 |
| <i>R. bupleuroides</i> | 86.40  | 29.48 |

|                        |        |       |
|------------------------|--------|-------|
| <i>R. bupleuroides</i> | 89.48  | 29.49 |
| <i>R. bupleuroides</i> | 94.92  | 29.58 |
| <i>R. bupleuroides</i> | 98.30  | 29.58 |
| <i>R. bupleuroides</i> | 81.00  | 29.61 |
| <i>R. bupleuroides</i> | 89.14  | 29.65 |
| <i>R. bupleuroides</i> | 91.14  | 29.65 |
| <i>R. bupleuroides</i> | 94.35  | 29.67 |
| <i>R. bupleuroides</i> | 98.52  | 29.68 |
| <i>R. bupleuroides</i> | 91.03  | 29.72 |
| <i>R. bupleuroides</i> | 98.45  | 29.72 |
| <i>R. bupleuroides</i> | 97.76  | 29.73 |
| <i>R. bupleuroides</i> | 91.90  | 29.77 |
| <i>R. bupleuroides</i> | 91.78  | 29.79 |
| <i>R. bupleuroides</i> | 91.57  | 29.81 |
| <i>R. bupleuroides</i> | 92.34  | 29.83 |
| <i>R. bupleuroides</i> | 84.18  | 29.88 |
| <i>R. bupleuroides</i> | 92.52  | 29.88 |
| <i>R. bupleuroides</i> | 93.26  | 29.88 |
| <i>R. bupleuroides</i> | 93.66  | 29.89 |
| <i>R. bupleuroides</i> | 93.16  | 29.93 |
| <i>R. bupleuroides</i> | 93.10  | 29.97 |
| <i>R. bupleuroides</i> | 102.01 | 29.99 |
| <i>R. bupleuroides</i> | 93.08  | 30.00 |
| <i>R. bupleuroides</i> | 100.86 | 30.00 |
| <i>R. bupleuroides</i> | 102.08 | 30.01 |
| <i>R. bupleuroides</i> | 84.00  | 30.02 |
| <i>R. bupleuroides</i> | 93.91  | 30.02 |
| <i>R. bupleuroides</i> | 100.89 | 30.04 |
| <i>R. bupleuroides</i> | 84.19  | 30.07 |
| <i>R. bupleuroides</i> | 91.78  | 30.09 |
| <i>R. bupleuroides</i> | 102.01 | 30.09 |
| <i>R. bupleuroides</i> | 80.83  | 30.10 |
| <i>R. bupleuroides</i> | 101.48 | 30.10 |
| <i>R. bupleuroides</i> | 92.13  | 30.12 |
| <i>R. bupleuroides</i> | 90.46  | 30.14 |
| <i>R. bupleuroides</i> | 101.82 | 30.15 |
| <i>R. bupleuroides</i> | 83.40  | 30.17 |
| <i>R. bupleuroides</i> | 99.99  | 30.18 |
| <i>R. bupleuroides</i> | 101.75 | 30.18 |
| <i>R. bupleuroides</i> | 80.28  | 30.25 |
| <i>R. bupleuroides</i> | 99.42  | 30.25 |
| <i>R. bupleuroides</i> | 99.28  | 30.30 |
| <i>R. bupleuroides</i> | 101.52 | 30.31 |
| <i>R. bupleuroides</i> | 99.55  | 30.33 |
| <i>R. bupleuroides</i> | 101.99 | 30.34 |
| <i>R. bupleuroides</i> | 79.83  | 30.42 |
| <i>R. bupleuroides</i> | 99.52  | 30.45 |
| <i>R. bupleuroides</i> | 99.50  | 30.47 |
| <i>R. bupleuroides</i> | 91.11  | 30.55 |

|                            |        |       |
|----------------------------|--------|-------|
| <i>R. bupleuroides</i>     | 91.26  | 30.59 |
| <i>R. bupleuroides</i>     | 79.60  | 30.68 |
| <i>R. bupleuroides</i>     | 91.50  | 30.72 |
| <i>R. bupleuroides</i>     | 81.61  | 30.81 |
| <i>R. bupleuroides</i>     | 100.69 | 30.82 |
| <i>R. bupleuroides</i>     | 81.30  | 30.99 |
| <i>R. bupleuroides</i>     | 82.45  | 31.04 |
| <i>R. bupleuroides</i>     | 93.11  | 31.07 |
| <i>R. bupleuroides</i>     | 97.52  | 31.29 |
| <i>R. bupleuroides</i>     | 97.99  | 31.29 |
| <i>R. bupleuroides</i>     | 97.52  | 31.38 |
| <i>R. bupleuroides</i>     | 92.98  | 31.40 |
| <i>R. bupleuroides</i>     | 93.70  | 31.48 |
| <i>R. bupleuroides</i>     | 98.22  | 31.49 |
| <i>R. bupleuroides</i>     | 98.20  | 31.51 |
| <i>R. bupleuroides</i>     | 98.57  | 31.59 |
| <i>R. bupleuroides</i>     | 85.17  | 31.62 |
| <i>R. bupleuroides</i>     | 94.55  | 31.63 |
| <i>R. bupleuroides</i>     | 85.03  | 31.72 |
| <i>R. bupleuroides</i>     | 99.73  | 31.83 |
| <i>R. bupleuroides</i>     | 100.73 | 31.88 |
| <i>R. bupleuroides</i>     | 98.81  | 32.03 |
| <i>R. bupleuroides</i>     | 77.13  | 32.17 |
| <i>R. bupleuroides</i>     | 77.00  | 33.00 |
| <i>R. bupleuroides</i>     | 76.28  | 33.02 |
| <i>R. bupleuroides</i>     | 76.35  | 33.13 |
| <i>R. bupleuroides</i>     | 75.33  | 34.00 |
| <i>R. bupleuroides</i>     | 75.33  | 34.03 |
| <i>R. bupleuroides</i>     | 75.23  | 34.15 |
| <i>R. bupleuroides</i>     | 74.65  | 34.50 |
| <i>R. chryanthemifolia</i> | 100.09 | 25.68 |
| <i>R. chryanthemifolia</i> | 101.56 | 27.36 |
| <i>R. chryanthemifolia</i> | 98.38  | 27.73 |
| <i>R. chryanthemifolia</i> | 99.12  | 27.73 |
| <i>R. chryanthemifolia</i> | 89.00  | 27.75 |
| <i>R. chryanthemifolia</i> | 86.73  | 27.77 |
| <i>R. chryanthemifolia</i> | 99.60  | 27.80 |
| <i>R. chryanthemifolia</i> | 101.58 | 27.86 |
| <i>R. chryanthemifolia</i> | 98.96  | 28.07 |
| <i>R. chryanthemifolia</i> | 99.32  | 28.27 |
| <i>R. chryanthemifolia</i> | 99.17  | 28.30 |
| <i>R. chryanthemifolia</i> | 99.08  | 28.34 |
| <i>R. chryanthemifolia</i> | 99.11  | 28.34 |
| <i>R. chryanthemifolia</i> | 99.76  | 28.37 |
| <i>R. chryanthemifolia</i> | 99.01  | 28.42 |
| <i>R. chryanthemifolia</i> | 98.43  | 28.44 |
| <i>R. chryanthemifolia</i> | 98.88  | 28.45 |
| <i>R. chryanthemifolia</i> | 101.22 | 28.48 |
| <i>R. chryanthemifolia</i> | 98.48  | 28.50 |

|                            |        |       |
|----------------------------|--------|-------|
| <i>R. chryanthemifolia</i> | 100.99 | 28.57 |
| <i>R. chryanthemifolia</i> | 98.63  | 28.69 |
| <i>R. chryanthemifolia</i> | 98.66  | 28.70 |
| <i>R. chryanthemifolia</i> | 99.87  | 28.77 |
| <i>R. chryanthemifolia</i> | 99.31  | 28.80 |
| <i>R. chryanthemifolia</i> | 99.78  | 28.93 |
| <i>R. chryanthemifolia</i> | 99.78  | 28.94 |
| <i>R. chryanthemifolia</i> | 90.47  | 28.98 |
| <i>R. chryanthemifolia</i> | 93.23  | 29.00 |
| <i>R. chryanthemifolia</i> | 99.75  | 29.01 |
| <i>R. chryanthemifolia</i> | 92.30  | 29.04 |
| <i>R. chryanthemifolia</i> | 87.56  | 29.07 |
| <i>R. chryanthemifolia</i> | 93.08  | 29.08 |
| <i>R. chryanthemifolia</i> | 99.63  | 29.10 |
| <i>R. chryanthemifolia</i> | 90.41  | 29.11 |
| <i>R. chryanthemifolia</i> | 92.52  | 29.12 |
| <i>R. chryanthemifolia</i> | 100.00 | 29.12 |
| <i>R. chryanthemifolia</i> | 101.40 | 29.14 |
| <i>R. chryanthemifolia</i> | 90.47  | 29.16 |
| <i>R. chryanthemifolia</i> | 90.51  | 29.16 |
| <i>R. chryanthemifolia</i> | 94.23  | 29.21 |
| <i>R. chryanthemifolia</i> | 92.09  | 29.24 |
| <i>R. chryanthemifolia</i> | 92.28  | 29.24 |
| <i>R. chryanthemifolia</i> | 90.62  | 29.25 |
| <i>R. chryanthemifolia</i> | 91.97  | 29.29 |
| <i>R. chryanthemifolia</i> | 90.72  | 29.30 |
| <i>R. chryanthemifolia</i> | 90.28  | 29.33 |
| <i>R. chryanthemifolia</i> | 90.88  | 29.35 |
| <i>R. chryanthemifolia</i> | 99.43  | 29.37 |
| <i>R. chryanthemifolia</i> | 99.42  | 29.39 |
| <i>R. chryanthemifolia</i> | 88.90  | 29.40 |
| <i>R. chryanthemifolia</i> | 88.86  | 29.43 |
| <i>R. chryanthemifolia</i> | 94.91  | 29.54 |
| <i>R. chryanthemifolia</i> | 91.05  | 29.65 |
| <i>R. chryanthemifolia</i> | 91.12  | 29.66 |
| <i>R. chryanthemifolia</i> | 101.90 | 29.66 |
| <i>R. chryanthemifolia</i> | 91.03  | 29.67 |
| <i>R. chryanthemifolia</i> | 91.05  | 29.67 |
| <i>R. chryanthemifolia</i> | 94.38  | 29.67 |
| <i>R. chryanthemifolia</i> | 94.40  | 29.67 |
| <i>R. chryanthemifolia</i> | 91.38  | 29.68 |
| <i>R. chryanthemifolia</i> | 93.26  | 29.88 |
| <i>R. chryanthemifolia</i> | 93.30  | 29.88 |
| <i>R. chryanthemifolia</i> | 92.85  | 29.97 |
| <i>R. chryanthemifolia</i> | 100.36 | 29.99 |
| <i>R. chryanthemifolia</i> | 101.31 | 30.04 |
| <i>R. chryanthemifolia</i> | 97.63  | 30.58 |
| <i>R. chryanthemifolia</i> | 97.26  | 30.69 |
| <i>R. chryanthemifolia</i> | 101.46 | 30.72 |

|                            |        |       |
|----------------------------|--------|-------|
| <i>R. chryanthemifolia</i> | 97.26  | 31.16 |
| <i>R. chryanthemifolia</i> | 94.53  | 31.80 |
| <i>R. chryanthemifolia</i> | 103.90 | 33.15 |
| <i>R. crenulata</i>        | 100.18 | 27.03 |
| <i>R. crenulata</i>        | 100.19 | 27.06 |
| <i>R. crenulata</i>        | 100.18 | 27.12 |
| <i>R. crenulata</i>        | 100.16 | 27.18 |
| <i>R. crenulata</i>        | 100.09 | 27.32 |
| <i>R. crenulata</i>        | 99.76  | 27.69 |
| <i>R. crenulata</i>        | 89.21  | 27.78 |
| <i>R. crenulata</i>        | 88.70  | 27.83 |
| <i>R. crenulata</i>        | 86.82  | 27.91 |
| <i>R. crenulata</i>        | 86.84  | 27.91 |
| <i>R. crenulata</i>        | 99.91  | 27.96 |
| <i>R. crenulata</i>        | 88.77  | 27.97 |
| <i>R. crenulata</i>        | 99.97  | 27.97 |
| <i>R. crenulata</i>        | 87.05  | 27.98 |
| <i>R. crenulata</i>        | 87.70  | 27.99 |
| <i>R. crenulata</i>        | 87.03  | 28.00 |
| <i>R. crenulata</i>        | 87.70  | 28.01 |
| <i>R. crenulata</i>        | 99.90  | 28.11 |
| <i>R. crenulata</i>        | 99.89  | 28.12 |
| <i>R. crenulata</i>        | 86.01  | 28.16 |
| <i>R. crenulata</i>        | 86.81  | 28.18 |
| <i>R. crenulata</i>        | 86.77  | 28.19 |
| <i>R. crenulata</i>        | 86.82  | 28.20 |
| <i>R. crenulata</i>        | 85.42  | 28.24 |
| <i>R. crenulata</i>        | 99.03  | 28.33 |
| <i>R. crenulata</i>        | 92.47  | 28.46 |
| <i>R. crenulata</i>        | 98.73  | 28.48 |
| <i>R. crenulata</i>        | 90.55  | 28.50 |
| <i>R. crenulata</i>        | 98.80  | 28.51 |
| <i>R. crenulata</i>        | 85.76  | 28.56 |
| <i>R. crenulata</i>        | 100.99 | 28.58 |
| <i>R. crenulata</i>        | 99.85  | 28.59 |
| <i>R. crenulata</i>        | 98.63  | 28.65 |
| <i>R. crenulata</i>        | 97.43  | 28.70 |
| <i>R. crenulata</i>        | 97.37  | 28.78 |
| <i>R. crenulata</i>        | 99.74  | 28.82 |
| <i>R. crenulata</i>        | 93.11  | 28.93 |
| <i>R. crenulata</i>        | 97.49  | 28.96 |
| <i>R. crenulata</i>        | 98.66  | 28.96 |
| <i>R. crenulata</i>        | 87.64  | 29.08 |
| <i>R. crenulata</i>        | 92.42  | 29.10 |
| <i>R. crenulata</i>        | 100.04 | 29.13 |
| <i>R. crenulata</i>        | 100.04 | 29.15 |
| <i>R. crenulata</i>        | 101.44 | 29.15 |
| <i>R. crenulata</i>        | 97.22  | 29.17 |
| <i>R. crenulata</i>        | 98.98  | 29.24 |

|                     |        |       |
|---------------------|--------|-------|
| <i>R. crenulata</i> | 95.56  | 29.35 |
| <i>R. crenulata</i> | 101.98 | 29.51 |
| <i>R. crenulata</i> | 94.22  | 29.53 |
| <i>R. crenulata</i> | 90.76  | 29.58 |
| <i>R. crenulata</i> | 94.50  | 29.62 |
| <i>R. crenulata</i> | 94.68  | 29.62 |
| <i>R. crenulata</i> | 94.70  | 29.62 |
| <i>R. crenulata</i> | 94.41  | 29.64 |
| <i>R. crenulata</i> | 94.70  | 29.64 |
| <i>R. crenulata</i> | 101.98 | 29.67 |
| <i>R. crenulata</i> | 98.00  | 29.71 |
| <i>R. crenulata</i> | 92.31  | 29.79 |
| <i>R. crenulata</i> | 92.36  | 29.86 |
| <i>R. crenulata</i> | 92.32  | 29.92 |
| <i>R. crenulata</i> | 89.09  | 30.07 |
| <i>R. crenulata</i> | 101.82 | 30.10 |
| <i>R. crenulata</i> | 90.42  | 30.20 |
| <i>R. crenulata</i> | 80.25  | 30.30 |
| <i>R. crenulata</i> | 80.62  | 30.33 |
| <i>R. crenulata</i> | 101.76 | 30.41 |
| <i>R. crenulata</i> | 79.83  | 30.42 |
| <i>R. crenulata</i> | 84.01  | 30.42 |
| <i>R. crenulata</i> | 101.83 | 30.42 |
| <i>R. crenulata</i> | 81.29  | 30.50 |
| <i>R. crenulata</i> | 102.15 | 30.53 |
| <i>R. crenulata</i> | 93.49  | 30.59 |
| <i>R. crenulata</i> | 79.60  | 30.68 |
| <i>R. crenulata</i> | 81.64  | 30.87 |
| <i>R. crenulata</i> | 96.94  | 31.08 |
| <i>R. crenulata</i> | 99.66  | 31.08 |
| <i>R. crenulata</i> | 80.93  | 31.23 |
| <i>R. crenulata</i> | 98.57  | 31.81 |
| <i>R. crenulata</i> | 98.91  | 31.94 |
| <i>R. crenulata</i> | 94.13  | 31.95 |
| <i>R. crenulata</i> | 98.91  | 31.95 |
| <i>R. crenulata</i> | 102.22 | 31.95 |
| <i>R. crenulata</i> | 98.80  | 32.03 |
| <i>R. crenulata</i> | 95.62  | 32.28 |
| <i>R. crenulata</i> | 77.25  | 32.37 |
| <i>R. crenulata</i> | 93.73  | 32.46 |
| <i>R. crenulata</i> | 100.54 | 32.58 |
| <i>R. crenulata</i> | 98.05  | 32.66 |
| <i>R. crenulata</i> | 77.50  | 32.70 |
| <i>R. crenulata</i> | 97.92  | 32.78 |
| <i>R. crenulata</i> | 97.12  | 32.87 |
| <i>R. crenulata</i> | 98.07  | 32.98 |
| <i>R. crenulata</i> | 97.01  | 33.02 |
| <i>R. crenulata</i> | 77.59  | 33.03 |
| <i>R. crenulata</i> | 99.56  | 33.36 |



|                     |        |       |
|---------------------|--------|-------|
| <i>R. crenulata</i> | 99.33  | 34.32 |
| <i>R. dumulosa</i>  | 100.14 | 26.99 |
| <i>R. dumulosa</i>  | 91.90  | 28.12 |
| <i>R. dumulosa</i>  | 86.84  | 28.16 |
| <i>R. dumulosa</i>  | 98.79  | 28.36 |
| <i>R. dumulosa</i>  | 90.58  | 28.43 |
| <i>R. dumulosa</i>  | 92.23  | 28.47 |
| <i>R. dumulosa</i>  | 90.63  | 28.50 |
| <i>R. dumulosa</i>  | 85.40  | 28.93 |
| <i>R. dumulosa</i>  | 99.80  | 28.93 |
| <i>R. dumulosa</i>  | 93.98  | 29.05 |
| <i>R. dumulosa</i>  | 92.28  | 29.87 |
| <i>R. dumulosa</i>  | 102.23 | 29.91 |
| <i>R. dumulosa</i>  | 101.96 | 30.06 |
| <i>R. dumulosa</i>  | 90.58  | 30.32 |
| <i>R. dumulosa</i>  | 90.55  | 30.35 |
| <i>R. dumulosa</i>  | 110.26 | 31.45 |
| <i>R. dumulosa</i>  | 95.33  | 31.50 |
| <i>R. dumulosa</i>  | 94.92  | 31.68 |
| <i>R. dumulosa</i>  | 94.52  | 31.70 |
| <i>R. dumulosa</i>  | 102.66 | 31.84 |
| <i>R. dumulosa</i>  | 98.92  | 31.93 |
| <i>R. dumulosa</i>  | 97.07  | 32.08 |
| <i>R. dumulosa</i>  | 97.27  | 32.09 |
| <i>R. dumulosa</i>  | 97.27  | 32.12 |
| <i>R. dumulosa</i>  | 97.05  | 32.15 |
| <i>R. dumulosa</i>  | 103.83 | 32.59 |
| <i>R. dumulosa</i>  | 97.01  | 33.02 |
| <i>R. dumulosa</i>  | 101.13 | 33.43 |
| <i>R. dumulosa</i>  | 91.20  | 33.47 |
| <i>R. dumulosa</i>  | 107.60 | 33.72 |
| <i>R. dumulosa</i>  | 107.77 | 33.95 |
| <i>R. dumulosa</i>  | 107.79 | 33.96 |
| <i>R. dumulosa</i>  | 107.25 | 33.98 |
| <i>R. dumulosa</i>  | 107.81 | 34.00 |
| <i>R. dumulosa</i>  | 103.75 | 34.93 |
| <i>R. dumulosa</i>  | 106.05 | 35.56 |
| <i>R. dumulosa</i>  | 103.20 | 35.59 |
| <i>R. dumulosa</i>  | 102.48 | 35.68 |
| <i>R. dumulosa</i>  | 103.95 | 35.75 |
| <i>R. dumulosa</i>  | 104.11 | 35.84 |
| <i>R. dumulosa</i>  | 94.57  | 35.87 |
| <i>R. dumulosa</i>  | 101.79 | 35.87 |
| <i>R. dumulosa</i>  | 103.76 | 36.08 |
| <i>R. dumulosa</i>  | 102.72 | 36.11 |
| <i>R. dumulosa</i>  | 102.72 | 36.12 |
| <i>R. dumulosa</i>  | 102.44 | 36.51 |
| <i>R. dumulosa</i>  | 102.39 | 36.66 |
| <i>R. dumulosa</i>  | 102.38 | 36.67 |

|                      |        |       |
|----------------------|--------|-------|
| <i>R. dumulosa</i>   | 102.37 | 36.72 |
| <i>R. dumulosa</i>   | 103.26 | 36.74 |
| <i>R. dumulosa</i>   | 102.53 | 36.77 |
| <i>R. dumulosa</i>   | 102.28 | 36.79 |
| <i>R. dumulosa</i>   | 102.66 | 36.79 |
| <i>R. dumulosa</i>   | 102.48 | 36.82 |
| <i>R. dumulosa</i>   | 102.27 | 36.84 |
| <i>R. dumulosa</i>   | 102.15 | 36.85 |
| <i>R. dumulosa</i>   | 101.70 | 36.93 |
| <i>R. dumulosa</i>   | 103.14 | 36.97 |
| <i>R. dumulosa</i>   | 101.76 | 37.03 |
| <i>R. dumulosa</i>   | 101.57 | 37.14 |
| <i>R. dumulosa</i>   | 101.57 | 37.16 |
| <i>R. dumulosa</i>   | 101.91 | 37.16 |
| <i>R. dumulosa</i>   | 102.67 | 37.23 |
| <i>R. dumulosa</i>   | 101.54 | 37.24 |
| <i>R. dumulosa</i>   | 102.01 | 37.28 |
| <i>R. dumulosa</i>   | 102.01 | 37.29 |
| <i>R. dumulosa</i>   | 101.76 | 37.50 |
| <i>R. dumulosa</i>   | 111.49 | 37.90 |
| <i>R. dumulosa</i>   | 111.52 | 37.90 |
| <i>R. dumulosa</i>   | 100.25 | 38.13 |
| <i>R. dumulosa</i>   | 99.67  | 38.63 |
| <i>R. dumulosa</i>   | 111.84 | 38.72 |
| <i>R. dumulosa</i>   | 111.87 | 38.73 |
| <i>R. dumulosa</i>   | 111.89 | 38.73 |
| <i>R. dumulosa</i>   | 111.93 | 38.73 |
| <i>R. dumulosa</i>   | 111.93 | 38.74 |
| <i>R. dumulosa</i>   | 111.93 | 38.75 |
| <i>R. dumulosa</i>   | 105.94 | 38.84 |
| <i>R. dumulosa</i>   | 105.69 | 38.85 |
| <i>R. dumulosa</i>   | 105.94 | 38.85 |
| <i>R. dumulosa</i>   | 113.55 | 39.00 |
| <i>R. dumulosa</i>   | 113.60 | 39.01 |
| <i>R. dumulosa</i>   | 113.49 | 39.04 |
| <i>R. dumulosa</i>   | 113.53 | 39.05 |
| <i>R. dumulosa</i>   | 113.57 | 39.08 |
| <i>R. dumulosa</i>   | 114.97 | 39.91 |
| <i>R. dumulosa</i>   | 115.05 | 39.94 |
| <i>R. dumulosa</i>   | 115.06 | 39.95 |
| <i>R. dumulosa</i>   | 115.49 | 40.01 |
| <i>R. dumulosa</i>   | 115.48 | 40.03 |
| <i>R. dumulosa</i>   | 115.50 | 40.03 |
| <i>R. dumulosa</i>   | 115.47 | 40.04 |
| <i>R. dumulosa</i>   | 111.26 | 40.84 |
| <i>R. fastigiata</i> | 100.11 | 25.65 |
| <i>R. fastigiata</i> | 100.10 | 25.66 |
| <i>R. fastigiata</i> | 100.09 | 25.67 |
| <i>R. fastigiata</i> | 102.91 | 26.15 |

|                      |        |       |
|----------------------|--------|-------|
| <i>R. fastigiata</i> | 102.96 | 26.15 |
| <i>R. fastigiata</i> | 102.85 | 26.16 |
| <i>R. fastigiata</i> | 100.24 | 26.89 |
| <i>R. fastigiata</i> | 99.67  | 26.91 |
| <i>R. fastigiata</i> | 100.21 | 27.09 |
| <i>R. fastigiata</i> | 100.17 | 27.13 |
| <i>R. fastigiata</i> | 100.17 | 27.15 |
| <i>R. fastigiata</i> | 103.06 | 27.17 |
| <i>R. fastigiata</i> | 102.43 | 27.27 |
| <i>R. fastigiata</i> | 98.81  | 27.75 |
| <i>R. fastigiata</i> | 99.58  | 27.77 |
| <i>R. fastigiata</i> | 98.75  | 27.79 |
| <i>R. fastigiata</i> | 99.60  | 27.79 |
| <i>R. fastigiata</i> | 98.75  | 27.81 |
| <i>R. fastigiata</i> | 99.71  | 27.82 |
| <i>R. fastigiata</i> | 99.72  | 27.83 |
| <i>R. fastigiata</i> | 99.52  | 27.88 |
| <i>R. fastigiata</i> | 101.60 | 27.88 |
| <i>R. fastigiata</i> | 86.71  | 27.91 |
| <i>R. fastigiata</i> | 99.70  | 27.91 |
| <i>R. fastigiata</i> | 101.30 | 27.93 |
| <i>R. fastigiata</i> | 87.05  | 27.98 |
| <i>R. fastigiata</i> | 101.17 | 27.99 |
| <i>R. fastigiata</i> | 101.34 | 27.99 |
| <i>R. fastigiata</i> | 101.34 | 28.01 |
| <i>R. fastigiata</i> | 92.00  | 28.03 |
| <i>R. fastigiata</i> | 85.99  | 28.07 |
| <i>R. fastigiata</i> | 98.60  | 28.10 |
| <i>R. fastigiata</i> | 85.95  | 28.14 |
| <i>R. fastigiata</i> | 99.81  | 28.15 |
| <i>R. fastigiata</i> | 85.92  | 28.16 |
| <i>R. fastigiata</i> | 86.85  | 28.16 |
| <i>R. fastigiata</i> | 103.22 | 28.27 |
| <i>R. fastigiata</i> | 98.75  | 28.31 |
| <i>R. fastigiata</i> | 87.05  | 28.33 |
| <i>R. fastigiata</i> | 99.11  | 28.36 |
| <i>R. fastigiata</i> | 98.65  | 28.39 |
| <i>R. fastigiata</i> | 98.77  | 28.40 |
| <i>R. fastigiata</i> | 92.05  | 28.41 |
| <i>R. fastigiata</i> | 99.08  | 28.43 |
| <i>R. fastigiata</i> | 98.74  | 28.44 |
| <i>R. fastigiata</i> | 99.06  | 28.45 |
| <i>R. fastigiata</i> | 103.22 | 28.46 |
| <i>R. fastigiata</i> | 98.89  | 28.49 |
| <i>R. fastigiata</i> | 98.95  | 28.49 |
| <i>R. fastigiata</i> | 98.91  | 28.54 |
| <i>R. fastigiata</i> | 99.86  | 28.59 |
| <i>R. fastigiata</i> | 87.19  | 28.60 |
| <i>R. fastigiata</i> | 99.84  | 28.60 |

|                      |        |       |
|----------------------|--------|-------|
| <i>R. fastigiata</i> | 98.62  | 28.65 |
| <i>R. fastigiata</i> | 98.66  | 28.65 |
| <i>R. fastigiata</i> | 83.98  | 28.68 |
| <i>R. fastigiata</i> | 102.40 | 28.70 |
| <i>R. fastigiata</i> | 97.36  | 28.71 |
| <i>R. fastigiata</i> | 99.87  | 28.73 |
| <i>R. fastigiata</i> | 102.37 | 28.74 |
| <i>R. fastigiata</i> | 97.55  | 28.79 |
| <i>R. fastigiata</i> | 93.07  | 28.91 |
| <i>R. fastigiata</i> | 101.51 | 29.00 |
| <i>R. fastigiata</i> | 92.35  | 29.04 |
| <i>R. fastigiata</i> | 100.30 | 29.04 |
| <i>R. fastigiata</i> | 92.32  | 29.05 |
| <i>R. fastigiata</i> | 100.89 | 29.07 |
| <i>R. fastigiata</i> | 102.19 | 29.07 |
| <i>R. fastigiata</i> | 93.42  | 29.09 |
| <i>R. fastigiata</i> | 100.02 | 29.10 |
| <i>R. fastigiata</i> | 99.94  | 29.14 |
| <i>R. fastigiata</i> | 92.38  | 29.17 |
| <i>R. fastigiata</i> | 94.25  | 29.19 |
| <i>R. fastigiata</i> | 94.23  | 29.21 |
| <i>R. fastigiata</i> | 94.16  | 29.24 |
| <i>R. fastigiata</i> | 95.75  | 29.33 |
| <i>R. fastigiata</i> | 95.55  | 29.36 |
| <i>R. fastigiata</i> | 95.52  | 29.39 |
| <i>R. fastigiata</i> | 95.71  | 29.39 |
| <i>R. fastigiata</i> | 100.98 | 29.40 |
| <i>R. fastigiata</i> | 96.86  | 29.42 |
| <i>R. fastigiata</i> | 94.86  | 29.46 |
| <i>R. fastigiata</i> | 94.85  | 29.49 |
| <i>R. fastigiata</i> | 97.68  | 29.53 |
| <i>R. fastigiata</i> | 97.48  | 29.54 |
| <i>R. fastigiata</i> | 94.59  | 29.57 |
| <i>R. fastigiata</i> | 94.59  | 29.59 |
| <i>R. fastigiata</i> | 100.90 | 29.59 |
| <i>R. fastigiata</i> | 94.63  | 29.60 |
| <i>R. fastigiata</i> | 94.65  | 29.61 |
| <i>R. fastigiata</i> | 94.71  | 29.61 |
| <i>R. fastigiata</i> | 94.65  | 29.63 |
| <i>R. fastigiata</i> | 94.32  | 29.64 |
| <i>R. fastigiata</i> | 87.53  | 29.65 |
| <i>R. fastigiata</i> | 94.44  | 29.65 |
| <i>R. fastigiata</i> | 94.68  | 29.65 |
| <i>R. fastigiata</i> | 94.69  | 29.66 |
| <i>R. fastigiata</i> | 96.04  | 29.71 |
| <i>R. fastigiata</i> | 91.02  | 29.72 |
| <i>R. fastigiata</i> | 97.75  | 29.74 |
| <i>R. fastigiata</i> | 97.23  | 29.79 |
| <i>R. fastigiata</i> | 94.56  | 29.80 |

|                      |        |       |
|----------------------|--------|-------|
| <i>R. fastigiata</i> | 97.16  | 29.81 |
| <i>R. fastigiata</i> | 95.29  | 29.91 |
| <i>R. fastigiata</i> | 85.73  | 29.93 |
| <i>R. fastigiata</i> | 84.33  | 29.94 |
| <i>R. fastigiata</i> | 94.72  | 29.94 |
| <i>R. fastigiata</i> | 95.44  | 29.96 |
| <i>R. fastigiata</i> | 101.99 | 29.98 |
| <i>R. fastigiata</i> | 101.97 | 29.99 |
| <i>R. fastigiata</i> | 102.01 | 29.99 |
| <i>R. fastigiata</i> | 100.27 | 30.00 |
| <i>R. fastigiata</i> | 100.87 | 30.02 |
| <i>R. fastigiata</i> | 101.96 | 30.06 |
| <i>R. fastigiata</i> | 101.80 | 30.11 |
| <i>R. fastigiata</i> | 101.87 | 30.14 |
| <i>R. fastigiata</i> | 101.86 | 30.15 |
| <i>R. fastigiata</i> | 102.52 | 30.16 |
| <i>R. fastigiata</i> | 101.76 | 30.17 |
| <i>R. fastigiata</i> | 81.29  | 30.20 |
| <i>R. fastigiata</i> | 99.56  | 30.26 |
| <i>R. fastigiata</i> | 99.54  | 30.29 |
| <i>R. fastigiata</i> | 102.39 | 30.40 |
| <i>R. fastigiata</i> | 97.60  | 30.44 |
| <i>R. fastigiata</i> | 97.65  | 30.44 |
| <i>R. fastigiata</i> | 97.61  | 30.46 |
| <i>R. fastigiata</i> | 102.80 | 30.47 |
| <i>R. fastigiata</i> | 81.29  | 30.51 |
| <i>R. fastigiata</i> | 97.27  | 30.69 |
| <i>R. fastigiata</i> | 100.37 | 30.75 |
| <i>R. fastigiata</i> | 102.98 | 31.10 |
| <i>R. fastigiata</i> | 102.51 | 31.13 |
| <i>R. fastigiata</i> | 102.14 | 31.33 |
| <i>R. fastigiata</i> | 93.75  | 31.39 |
| <i>R. fastigiata</i> | 85.56  | 31.47 |
| <i>R. fastigiata</i> | 102.20 | 31.48 |
| <i>R. fastigiata</i> | 95.29  | 31.53 |
| <i>R. fastigiata</i> | 102.27 | 31.54 |
| <i>R. fastigiata</i> | 95.43  | 31.57 |
| <i>R. fastigiata</i> | 101.69 | 31.79 |
| <i>R. fastigiata</i> | 101.80 | 31.81 |
| <i>R. fastigiata</i> | 79.92  | 31.84 |
| <i>R. fastigiata</i> | 102.19 | 31.87 |
| <i>R. fastigiata</i> | 102.19 | 31.89 |
| <i>R. fastigiata</i> | 102.22 | 31.90 |
| <i>R. fastigiata</i> | 84.73  | 31.92 |
| <i>R. fastigiata</i> | 101.02 | 31.94 |
| <i>R. fastigiata</i> | 98.80  | 32.02 |
| <i>R. fastigiata</i> | 102.65 | 32.04 |
| <i>R. fastigiata</i> | 102.78 | 32.13 |
| <i>R. fastigiata</i> | 103.60 | 32.66 |

|                      |        |       |
|----------------------|--------|-------|
| <i>R. fastigiata</i> | 103.75 | 32.75 |
| <i>R. fastigiata</i> | 100.54 | 32.89 |
| <i>R. fastigiata</i> | 100.77 | 32.96 |
| <i>R. fastigiata</i> | 79.62  | 33.31 |
| <i>R. fastigiata</i> | 102.54 | 35.17 |
| <i>R. fastigiata</i> | 93.08  | 35.22 |
| <i>R. fastigiata</i> | 93.09  | 35.24 |
| <i>R. fastigiata</i> | 102.03 | 37.28 |
| <i>R. fastigiata</i> | 97.29  | 37.75 |
| <i>R. fastigiata</i> | 101.26 | 37.75 |
| <i>R. forrestii</i>  | 99.91  | 26.54 |
| <i>R. forrestii</i>  | 100.18 | 26.56 |
| <i>R. forrestii</i>  | 100.14 | 26.64 |
| <i>R. forrestii</i>  | 102.71 | 26.65 |
| <i>R. forrestii</i>  | 100.23 | 26.88 |
| <i>R. forrestii</i>  | 100.19 | 27.01 |
| <i>R. forrestii</i>  | 100.18 | 27.02 |
| <i>R. forrestii</i>  | 100.18 | 27.03 |
| <i>R. forrestii</i>  | 102.75 | 27.17 |
| <i>R. forrestii</i>  | 99.29  | 27.18 |
| <i>R. forrestii</i>  | 103.07 | 27.18 |
| <i>R. forrestii</i>  | 100.10 | 27.36 |
| <i>R. forrestii</i>  | 101.56 | 27.38 |
| <i>R. forrestii</i>  | 102.79 | 27.61 |
| <i>R. forrestii</i>  | 99.12  | 27.71 |
| <i>R. forrestii</i>  | 99.81  | 27.79 |
| <i>R. forrestii</i>  | 99.63  | 27.81 |
| <i>R. forrestii</i>  | 99.71  | 27.82 |
| <i>R. forrestii</i>  | 100.00 | 27.83 |
| <i>R. forrestii</i>  | 101.61 | 27.87 |
| <i>R. forrestii</i>  | 101.25 | 27.92 |
| <i>R. forrestii</i>  | 103.39 | 27.93 |
| <i>R. forrestii</i>  | 100.72 | 28.07 |
| <i>R. forrestii</i>  | 101.21 | 28.12 |
| <i>R. forrestii</i>  | 100.82 | 28.17 |
| <i>R. forrestii</i>  | 103.52 | 28.31 |
| <i>R. forrestii</i>  | 103.37 | 28.42 |
| <i>R. forrestii</i>  | 100.99 | 28.54 |
| <i>R. forrestii</i>  | 102.38 | 28.68 |
| <i>R. forrestii</i>  | 101.48 | 28.98 |
| <i>R. forrestii</i>  | 101.49 | 28.99 |
| <i>R. forrestii</i>  | 101.50 | 29.00 |
| <i>R. forrestii</i>  | 102.91 | 29.02 |
| <i>R. forrestii</i>  | 101.77 | 29.57 |
| <i>R. forrestii</i>  | 101.77 | 29.58 |
| <i>R. forrestii</i>  | 101.99 | 29.68 |
| <i>R. forrestii</i>  | 101.30 | 30.05 |
| <i>R. forrestii</i>  | 102.01 | 31.34 |
| <i>R. forrestii</i>  | 102.81 | 31.66 |

|                     |        |       |
|---------------------|--------|-------|
| <i>R. forrestii</i> | 103.87 | 31.68 |
| <i>R. forrestii</i> | 100.95 | 32.27 |
| <i>R. henryi</i>    | 103.11 | 27.82 |
| <i>R. henryi</i>    | 108.68 | 27.88 |
| <i>R. henryi</i>    | 108.69 | 27.92 |
| <i>R. henryi</i>    | 108.79 | 28.56 |
| <i>R. henryi</i>    | 107.26 | 28.91 |
| <i>R. henryi</i>    | 107.16 | 28.94 |
| <i>R. henryi</i>    | 107.19 | 28.98 |
| <i>R. henryi</i>    | 107.15 | 29.01 |
| <i>R. henryi</i>    | 107.19 | 29.01 |
| <i>R. henryi</i>    | 107.19 | 29.03 |
| <i>R. henryi</i>    | 102.59 | 29.19 |
| <i>R. henryi</i>    | 107.43 | 29.23 |
| <i>R. henryi</i>    | 107.45 | 29.46 |
| <i>R. henryi</i>    | 108.05 | 29.51 |
| <i>R. henryi</i>    | 103.33 | 29.53 |
| <i>R. henryi</i>    | 107.61 | 29.54 |
| <i>R. henryi</i>    | 103.35 | 29.55 |
| <i>R. henryi</i>    | 108.69 | 29.59 |
| <i>R. henryi</i>    | 109.81 | 29.68 |
| <i>R. henryi</i>    | 108.28 | 29.74 |
| <i>R. henryi</i>    | 108.27 | 29.77 |
| <i>R. henryi</i>    | 110.38 | 29.83 |
| <i>R. henryi</i>    | 101.96 | 29.95 |
| <i>R. henryi</i>    | 101.94 | 29.97 |
| <i>R. henryi</i>    | 94.77  | 29.98 |
| <i>R. henryi</i>    | 101.53 | 30.01 |
| <i>R. henryi</i>    | 110.55 | 30.02 |
| <i>R. henryi</i>    | 110.79 | 30.05 |
| <i>R. henryi</i>    | 110.26 | 30.08 |
| <i>R. henryi</i>    | 110.67 | 30.14 |
| <i>R. henryi</i>    | 101.88 | 30.26 |
| <i>R. henryi</i>    | 102.86 | 30.37 |
| <i>R. henryi</i>    | 109.07 | 30.50 |
| <i>R. henryi</i>    | 109.54 | 30.67 |
| <i>R. henryi</i>    | 109.64 | 30.69 |
| <i>R. henryi</i>    | 102.17 | 30.76 |
| <i>R. henryi</i>    | 101.20 | 31.03 |
| <i>R. henryi</i>    | 110.93 | 31.06 |
| <i>R. henryi</i>    | 110.96 | 31.10 |
| <i>R. henryi</i>    | 110.16 | 31.29 |
| <i>R. henryi</i>    | 110.78 | 31.33 |
| <i>R. henryi</i>    | 109.92 | 31.36 |
| <i>R. henryi</i>    | 109.89 | 31.42 |
| <i>R. henryi</i>    | 110.23 | 31.46 |
| <i>R. henryi</i>    | 109.84 | 31.47 |
| <i>R. henryi</i>    | 109.92 | 31.47 |
| <i>R. henryi</i>    | 110.31 | 31.48 |

|                  |        |       |
|------------------|--------|-------|
| <i>R. henryi</i> | 110.43 | 31.49 |
| <i>R. henryi</i> | 109.11 | 31.51 |
| <i>R. henryi</i> | 110.35 | 31.51 |
| <i>R. henryi</i> | 110.48 | 31.53 |
| <i>R. henryi</i> | 110.48 | 31.58 |
| <i>R. henryi</i> | 110.83 | 31.60 |
| <i>R. henryi</i> | 110.43 | 31.65 |
| <i>R. henryi</i> | 110.47 | 31.66 |
| <i>R. henryi</i> | 115.56 | 31.70 |
| <i>R. henryi</i> | 111.08 | 31.71 |
| <i>R. henryi</i> | 110.50 | 31.72 |
| <i>R. henryi</i> | 110.47 | 31.73 |
| <i>R. henryi</i> | 111.12 | 31.73 |
| <i>R. henryi</i> | 110.50 | 31.79 |
| <i>R. henryi</i> | 109.41 | 31.84 |
| <i>R. henryi</i> | 108.43 | 31.88 |
| <i>R. henryi</i> | 108.56 | 31.91 |
| <i>R. henryi</i> | 108.41 | 31.93 |
| <i>R. henryi</i> | 108.78 | 31.95 |
| <i>R. henryi</i> | 109.36 | 32.02 |
| <i>R. henryi</i> | 108.84 | 32.03 |
| <i>R. henryi</i> | 110.73 | 32.03 |
| <i>R. henryi</i> | 108.19 | 32.10 |
| <i>R. henryi</i> | 109.28 | 32.10 |
| <i>R. henryi</i> | 108.94 | 32.19 |
| <i>R. henryi</i> | 108.22 | 32.20 |
| <i>R. henryi</i> | 109.03 | 32.26 |
| <i>R. henryi</i> | 104.89 | 32.39 |
| <i>R. henryi</i> | 104.79 | 32.51 |
| <i>R. henryi</i> | 104.66 | 32.55 |
| <i>R. henryi</i> | 106.86 | 32.61 |
| <i>R. henryi</i> | 107.97 | 32.61 |
| <i>R. henryi</i> | 106.99 | 32.67 |
| <i>R. henryi</i> | 105.08 | 32.68 |
| <i>R. henryi</i> | 106.99 | 32.70 |
| <i>R. henryi</i> | 106.86 | 32.72 |
| <i>R. henryi</i> | 103.82 | 32.75 |
| <i>R. henryi</i> | 105.25 | 32.79 |
| <i>R. henryi</i> | 104.83 | 32.81 |
| <i>R. henryi</i> | 104.44 | 32.86 |
| <i>R. henryi</i> | 104.59 | 32.90 |
| <i>R. henryi</i> | 105.30 | 32.98 |
| <i>R. henryi</i> | 109.42 | 32.99 |
| <i>R. henryi</i> | 108.27 | 33.16 |
| <i>R. henryi</i> | 110.19 | 33.20 |
| <i>R. henryi</i> | 108.63 | 33.33 |
| <i>R. henryi</i> | 108.41 | 33.35 |
| <i>R. henryi</i> | 105.49 | 33.38 |
| <i>R. henryi</i> | 108.50 | 33.39 |



|                      |        |       |
|----------------------|--------|-------|
| <i>R. henryi</i>     | 108.41 | 33.40 |
| <i>R. henryi</i>     | 107.92 | 33.43 |
| <i>R. henryi</i>     | 106.81 | 33.53 |
| <i>R. henryi</i>     | 108.55 | 33.55 |
| <i>R. henryi</i>     | 107.66 | 33.58 |
| <i>R. henryi</i>     | 109.00 | 33.62 |
| <i>R. henryi</i>     | 108.69 | 33.66 |
| <i>R. henryi</i>     | 111.81 | 33.67 |
| <i>R. henryi</i>     | 109.02 | 33.80 |
| <i>R. henryi</i>     | 107.53 | 33.81 |
| <i>R. henryi</i>     | 108.01 | 33.81 |
| <i>R. henryi</i>     | 104.08 | 33.93 |
| <i>R. henryi</i>     | 111.17 | 33.93 |
| <i>R. henryi</i>     | 107.76 | 33.99 |
| <i>R. henryi</i>     | 111.16 | 34.01 |
| <i>R. henryi</i>     | 107.72 | 34.02 |
| <i>R. henryi</i>     | 107.71 | 34.05 |
| <i>R. henryi</i>     | 107.72 | 34.08 |
| <i>R. henryi</i>     | 109.48 | 34.08 |
| <i>R. henryi</i>     | 107.87 | 34.09 |
| <i>R. henryi</i>     | 107.88 | 34.11 |
| <i>R. henryi</i>     | 107.10 | 34.13 |
| <i>R. henryi</i>     | 103.88 | 34.16 |
| <i>R. henryi</i>     | 107.18 | 34.24 |
| <i>R. henryi</i>     | 106.83 | 34.27 |
| <i>R. henryi</i>     | 106.14 | 34.35 |
| <i>R. henryi</i>     | 110.08 | 34.46 |
| <i>R. henryi</i>     | 110.08 | 34.49 |
| <i>R. henryi</i>     | 106.25 | 34.54 |
| <i>R. himalensis</i> | 88.84  | 27.40 |
| <i>R. himalensis</i> | 88.86  | 27.42 |
| <i>R. himalensis</i> | 87.99  | 27.43 |
| <i>R. himalensis</i> | 88.97  | 27.49 |
| <i>R. himalensis</i> | 86.47  | 27.52 |
| <i>R. himalensis</i> | 89.16  | 27.72 |
| <i>R. himalensis</i> | 86.43  | 27.73 |
| <i>R. himalensis</i> | 87.86  | 27.76 |
| <i>R. himalensis</i> | 86.72  | 27.91 |
| <i>R. himalensis</i> | 86.60  | 27.94 |
| <i>R. himalensis</i> | 86.60  | 27.96 |
| <i>R. himalensis</i> | 85.88  | 28.00 |
| <i>R. himalensis</i> | 87.69  | 28.01 |
| <i>R. himalensis</i> | 85.42  | 28.07 |
| <i>R. himalensis</i> | 85.57  | 28.10 |
| <i>R. himalensis</i> | 85.97  | 28.13 |
| <i>R. himalensis</i> | 90.90  | 28.35 |
| <i>R. himalensis</i> | 86.65  | 28.37 |
| <i>R. himalensis</i> | 85.31  | 28.38 |
| <i>R. himalensis</i> | 85.40  | 28.40 |

|                      |        |       |
|----------------------|--------|-------|
| <i>R. himalensis</i> | 98.91  | 28.49 |
| <i>R. himalensis</i> | 92.50  | 28.58 |
| <i>R. himalensis</i> | 92.53  | 28.60 |
| <i>R. himalensis</i> | 83.83  | 28.72 |
| <i>R. himalensis</i> | 99.91  | 28.77 |
| <i>R. himalensis</i> | 93.23  | 28.93 |
| <i>R. himalensis</i> | 93.43  | 29.10 |
| <i>R. himalensis</i> | 100.04 | 29.13 |
| <i>R. himalensis</i> | 100.08 | 29.16 |
| <i>R. himalensis</i> | 100.19 | 29.46 |
| <i>R. himalensis</i> | 94.93  | 29.49 |
| <i>R. himalensis</i> | 91.05  | 29.67 |
| <i>R. himalensis</i> | 91.07  | 29.67 |
| <i>R. himalensis</i> | 91.13  | 29.68 |
| <i>R. himalensis</i> | 95.70  | 29.75 |
| <i>R. himalensis</i> | 100.86 | 30.00 |
| <i>R. himalensis</i> | 101.39 | 30.05 |
| <i>R. himalensis</i> | 101.40 | 30.07 |
| <i>R. himalensis</i> | 101.78 | 30.07 |
| <i>R. himalensis</i> | 101.81 | 30.07 |
| <i>R. himalensis</i> | 92.13  | 30.12 |
| <i>R. himalensis</i> | 97.27  | 30.17 |
| <i>R. himalensis</i> | 81.30  | 30.19 |
| <i>R. himalensis</i> | 91.36  | 30.20 |
| <i>R. himalensis</i> | 90.62  | 30.30 |
| <i>R. himalensis</i> | 90.60  | 30.32 |
| <i>R. himalensis</i> | 96.97  | 31.08 |
| <i>R. himalensis</i> | 81.32  | 31.09 |
| <i>R. himalensis</i> | 103.71 | 31.30 |
| <i>R. himalensis</i> | 94.97  | 31.70 |
| <i>R. himalensis</i> | 101.71 | 31.77 |
| <i>R. himalensis</i> | 102.68 | 31.86 |
| <i>R. himalensis</i> | 99.12  | 31.87 |
| <i>R. himalensis</i> | 96.58  | 32.03 |
| <i>R. himalensis</i> | 96.53  | 32.07 |
| <i>R. himalensis</i> | 95.29  | 32.50 |
| <i>R. himalensis</i> | 100.46 | 32.58 |
| <i>R. himalensis</i> | 95.33  | 32.61 |
| <i>R. himalensis</i> | 95.61  | 32.78 |
| <i>R. himalensis</i> | 97.16  | 32.84 |
| <i>R. himalensis</i> | 95.15  | 32.87 |
| <i>R. himalensis</i> | 95.48  | 32.88 |
| <i>R. himalensis</i> | 95.61  | 32.98 |
| <i>R. himalensis</i> | 95.19  | 33.08 |
| <i>R. himalensis</i> | 97.13  | 33.36 |
| <i>R. himalensis</i> | 97.13  | 33.46 |
| <i>R. himalensis</i> | 100.93 | 33.53 |
| <i>R. himalensis</i> | 100.63 | 33.73 |
| <i>R. himalensis</i> | 101.05 | 33.77 |

|                      |        |       |
|----------------------|--------|-------|
| <i>R. himalensis</i> | 96.52  | 33.89 |
| <i>R. himalensis</i> | 99.45  | 34.00 |
| <i>R. himalensis</i> | 100.22 | 34.37 |
| <i>R. himalensis</i> | 100.21 | 34.48 |
| <i>R. himalensis</i> | 100.26 | 34.49 |
| <i>R. himalensis</i> | 99.97  | 34.52 |
| <i>R. himalensis</i> | 100.48 | 34.53 |
| <i>R. himalensis</i> | 100.46 | 34.54 |
| <i>R. himalensis</i> | 100.56 | 34.56 |
| <i>R. himalensis</i> | 101.34 | 34.58 |
| <i>R. himalensis</i> | 100.82 | 34.71 |
| <i>R. himalensis</i> | 100.70 | 34.77 |
| <i>R. himalensis</i> | 75.72  | 34.93 |
| <i>R. himalensis</i> | 75.47  | 34.97 |
| <i>R. himalensis</i> | 102.24 | 35.18 |
| <i>R. himalensis</i> | 101.91 | 35.88 |
| <i>R. himalensis</i> | 101.69 | 36.01 |
| <i>R. himalensis</i> | 101.62 | 36.28 |
| <i>R. himalensis</i> | 100.01 | 36.49 |
| <i>R. himalensis</i> | 99.80  | 36.50 |
| <i>R. himalensis</i> | 102.50 | 37.02 |
| <i>R. himalensis</i> | 101.58 | 37.11 |
| <i>R. himalensis</i> | 102.01 | 37.28 |
| <i>R. kirilowii</i>  | 100.19 | 27.03 |
| <i>R. kirilowii</i>  | 100.16 | 27.05 |
| <i>R. kirilowii</i>  | 100.19 | 27.05 |
| <i>R. kirilowii</i>  | 100.20 | 27.11 |
| <i>R. kirilowii</i>  | 99.12  | 27.71 |
| <i>R. kirilowii</i>  | 99.56  | 27.88 |
| <i>R. kirilowii</i>  | 98.47  | 27.98 |
| <i>R. kirilowii</i>  | 98.46  | 27.99 |
| <i>R. kirilowii</i>  | 98.50  | 27.99 |
| <i>R. kirilowii</i>  | 98.87  | 28.04 |
| <i>R. kirilowii</i>  | 98.96  | 28.07 |
| <i>R. kirilowii</i>  | 86.00  | 28.10 |
| <i>R. kirilowii</i>  | 99.82  | 28.16 |
| <i>R. kirilowii</i>  | 103.16 | 28.24 |
| <i>R. kirilowii</i>  | 99.07  | 28.33 |
| <i>R. kirilowii</i>  | 98.99  | 28.38 |
| <i>R. kirilowii</i>  | 99.01  | 28.38 |
| <i>R. kirilowii</i>  | 98.99  | 28.39 |
| <i>R. kirilowii</i>  | 85.23  | 28.55 |
| <i>R. kirilowii</i>  | 97.95  | 28.59 |
| <i>R. kirilowii</i>  | 102.39 | 28.63 |
| <i>R. kirilowii</i>  | 100.62 | 28.74 |
| <i>R. kirilowii</i>  | 93.80  | 28.77 |
| <i>R. kirilowii</i>  | 102.10 | 28.96 |
| <i>R. kirilowii</i>  | 100.02 | 29.12 |
| <i>R. kirilowii</i>  | 99.65  | 29.14 |

|                     |        |       |
|---------------------|--------|-------|
| <i>R. kirilowii</i> | 99.93  | 29.15 |
| <i>R. kirilowii</i> | 101.52 | 29.22 |
| <i>R. kirilowii</i> | 100.08 | 29.27 |
| <i>R. kirilowii</i> | 100.08 | 29.28 |
| <i>R. kirilowii</i> | 97.04  | 29.32 |
| <i>R. kirilowii</i> | 91.53  | 29.37 |
| <i>R. kirilowii</i> | 94.92  | 29.50 |
| <i>R. kirilowii</i> | 95.00  | 29.58 |
| <i>R. kirilowii</i> | 98.15  | 29.58 |
| <i>R. kirilowii</i> | 102.09 | 29.59 |
| <i>R. kirilowii</i> | 102.09 | 29.61 |
| <i>R. kirilowii</i> | 94.58  | 29.62 |
| <i>R. kirilowii</i> | 94.68  | 29.62 |
| <i>R. kirilowii</i> | 94.32  | 29.64 |
| <i>R. kirilowii</i> | 102.63 | 29.67 |
| <i>R. kirilowii</i> | 95.70  | 29.79 |
| <i>R. kirilowii</i> | 95.78  | 29.87 |
| <i>R. kirilowii</i> | 100.87 | 30.00 |
| <i>R. kirilowii</i> | 101.87 | 30.00 |
| <i>R. kirilowii</i> | 101.84 | 30.04 |
| <i>R. kirilowii</i> | 101.33 | 30.07 |
| <i>R. kirilowii</i> | 91.25  | 30.12 |
| <i>R. kirilowii</i> | 92.12  | 30.12 |
| <i>R. kirilowii</i> | 97.32  | 30.16 |
| <i>R. kirilowii</i> | 84.07  | 30.18 |
| <i>R. kirilowii</i> | 101.86 | 30.26 |
| <i>R. kirilowii</i> | 101.86 | 30.27 |
| <i>R. kirilowii</i> | 101.52 | 30.31 |
| <i>R. kirilowii</i> | 94.78  | 30.36 |
| <i>R. kirilowii</i> | 102.53 | 30.47 |
| <i>R. kirilowii</i> | 102.93 | 30.92 |
| <i>R. kirilowii</i> | 101.24 | 31.02 |
| <i>R. kirilowii</i> | 96.95  | 31.08 |
| <i>R. kirilowii</i> | 96.97  | 31.08 |
| <i>R. kirilowii</i> | 96.87  | 31.11 |
| <i>R. kirilowii</i> | 96.60  | 31.18 |
| <i>R. kirilowii</i> | 102.14 | 31.29 |
| <i>R. kirilowii</i> | 103.62 | 31.37 |
| <i>R. kirilowii</i> | 102.08 | 31.42 |
| <i>R. kirilowii</i> | 99.99  | 31.50 |
| <i>R. kirilowii</i> | 96.35  | 31.52 |
| <i>R. kirilowii</i> | 103.91 | 31.66 |
| <i>R. kirilowii</i> | 100.76 | 31.76 |
| <i>R. kirilowii</i> | 98.58  | 31.81 |
| <i>R. kirilowii</i> | 101.34 | 31.86 |
| <i>R. kirilowii</i> | 99.12  | 31.87 |
| <i>R. kirilowii</i> | 102.65 | 31.90 |
| <i>R. kirilowii</i> | 102.27 | 31.91 |
| <i>R. kirilowii</i> | 98.90  | 31.95 |

|                     |        |       |
|---------------------|--------|-------|
| <i>R. kirilowii</i> | 102.65 | 31.95 |
| <i>R. kirilowii</i> | 102.64 | 32.06 |
| <i>R. kirilowii</i> | 97.07  | 32.08 |
| <i>R. kirilowii</i> | 98.86  | 32.12 |
| <i>R. kirilowii</i> | 102.79 | 32.13 |
| <i>R. kirilowii</i> | 102.58 | 32.23 |
| <i>R. kirilowii</i> | 96.27  | 32.28 |
| <i>R. kirilowii</i> | 96.54  | 32.30 |
| <i>R. kirilowii</i> | 100.46 | 32.58 |
| <i>R. kirilowii</i> | 103.58 | 32.67 |
| <i>R. kirilowii</i> | 100.93 | 32.71 |
| <i>R. kirilowii</i> | 97.07  | 32.81 |
| <i>R. kirilowii</i> | 100.83 | 32.84 |
| <i>R. kirilowii</i> | 97.15  | 32.85 |
| <i>R. kirilowii</i> | 100.67 | 32.90 |
| <i>R. kirilowii</i> | 97.04  | 32.92 |
| <i>R. kirilowii</i> | 103.35 | 32.96 |
| <i>R. kirilowii</i> | 96.86  | 33.05 |
| <i>R. kirilowii</i> | 97.09  | 33.34 |
| <i>R. kirilowii</i> | 100.88 | 33.52 |
| <i>R. kirilowii</i> | 103.51 | 33.65 |
| <i>R. kirilowii</i> | 99.64  | 33.86 |
| <i>R. kirilowii</i> | 99.68  | 33.90 |
| <i>R. kirilowii</i> | 102.90 | 33.90 |
| <i>R. kirilowii</i> | 104.27 | 33.91 |
| <i>R. kirilowii</i> | 107.77 | 33.95 |
| <i>R. kirilowii</i> | 107.78 | 33.97 |
| <i>R. kirilowii</i> | 107.79 | 33.99 |
| <i>R. kirilowii</i> | 107.86 | 34.02 |
| <i>R. kirilowii</i> | 103.91 | 34.11 |
| <i>R. kirilowii</i> | 98.40  | 34.18 |
| <i>R. kirilowii</i> | 100.22 | 34.37 |
| <i>R. kirilowii</i> | 101.52 | 34.37 |
| <i>R. kirilowii</i> | 104.04 | 34.46 |
| <i>R. kirilowii</i> | 104.04 | 34.47 |
| <i>R. kirilowii</i> | 100.56 | 34.56 |
| <i>R. kirilowii</i> | 101.33 | 34.56 |
| <i>R. kirilowii</i> | 100.61 | 34.65 |
| <i>R. kirilowii</i> | 100.63 | 34.66 |
| <i>R. kirilowii</i> | 100.80 | 34.70 |
| <i>R. kirilowii</i> | 100.72 | 34.73 |
| <i>R. kirilowii</i> | 103.31 | 34.81 |
| <i>R. kirilowii</i> | 97.44  | 34.87 |
| <i>R. kirilowii</i> | 103.75 | 34.94 |
| <i>R. kirilowii</i> | 103.75 | 34.95 |
| <i>R. kirilowii</i> | 99.25  | 34.98 |
| <i>R. kirilowii</i> | 100.34 | 35.05 |
| <i>R. kirilowii</i> | 101.82 | 35.06 |
| <i>R. kirilowii</i> | 102.25 | 35.19 |

|                     |        |       |
|---------------------|--------|-------|
| <i>R. kirilowii</i> | 102.59 | 35.19 |
| <i>R. kirilowii</i> | 101.90 | 35.26 |
| <i>R. kirilowii</i> | 101.89 | 35.27 |
| <i>R. kirilowii</i> | 102.19 | 35.55 |
| <i>R. kirilowii</i> | 102.33 | 35.74 |
| <i>R. kirilowii</i> | 102.72 | 36.11 |
| <i>R. kirilowii</i> | 102.19 | 36.29 |
| <i>R. kirilowii</i> | 102.23 | 36.29 |
| <i>R. kirilowii</i> | 100.25 | 36.47 |
| <i>R. kirilowii</i> | 100.26 | 36.51 |
| <i>R. kirilowii</i> | 112.04 | 36.69 |
| <i>R. kirilowii</i> | 102.53 | 36.82 |
| <i>R. kirilowii</i> | 112.07 | 36.85 |
| <i>R. kirilowii</i> | 101.32 | 36.92 |
| <i>R. kirilowii</i> | 101.85 | 37.02 |
| <i>R. kirilowii</i> | 101.82 | 37.03 |
| <i>R. kirilowii</i> | 101.57 | 37.11 |
| <i>R. kirilowii</i> | 102.22 | 37.16 |
| <i>R. kirilowii</i> | 102.86 | 37.26 |
| <i>R. kirilowii</i> | 102.01 | 37.28 |
| <i>R. kirilowii</i> | 101.56 | 37.51 |
| <i>R. kirilowii</i> | 111.43 | 37.87 |
| <i>R. kirilowii</i> | 111.49 | 37.90 |
| <i>R. kirilowii</i> | 113.83 | 38.84 |
| <i>R. kirilowii</i> | 113.60 | 39.01 |
| <i>R. kirilowii</i> | 113.57 | 39.02 |
| <i>R. kirilowii</i> | 113.52 | 39.03 |
| <i>R. kirilowii</i> | 113.65 | 39.06 |
| <i>R. kirilowii</i> | 113.58 | 39.07 |
| <i>R. kirilowii</i> | 114.57 | 39.58 |
| <i>R. kirilowii</i> | 114.99 | 39.91 |
| <i>R. kirilowii</i> | 115.49 | 40.01 |
| <i>R. kirilowii</i> | 115.34 | 40.03 |
| <i>R. kirilowii</i> | 115.45 | 40.03 |
| <i>R. kirilowii</i> | 117.49 | 40.60 |
| <i>R. kirilowii</i> | 117.48 | 40.61 |
| <i>R. kirilowii</i> | 80.82  | 42.51 |
| <i>R. kirilowii</i> | 77.15  | 43.05 |
| <i>R. kirilowii</i> | 82.33  | 43.05 |
| <i>R. kirilowii</i> | 86.95  | 43.11 |
| <i>R. kirilowii</i> | 87.07  | 43.12 |
| <i>R. kirilowii</i> | 81.14  | 43.19 |
| <i>R. kirilowii</i> | 87.04  | 43.26 |
| <i>R. kirilowii</i> | 87.18  | 43.26 |
| <i>R. kirilowii</i> | 87.01  | 43.47 |
| <i>R. kirilowii</i> | 87.01  | 43.50 |
| <i>R. kirilowii</i> | 90.05  | 43.58 |
| <i>R. kirilowii</i> | 88.02  | 43.70 |
| <i>R. kirilowii</i> | 88.04  | 43.85 |

|                      |        |       |
|----------------------|--------|-------|
| <i>R. kirilowii</i>  | 88.24  | 47.97 |
| <i>R. quadrifida</i> | 100.09 | 27.32 |
| <i>R. quadrifida</i> | 102.46 | 27.34 |
| <i>R. quadrifida</i> | 88.95  | 27.53 |
| <i>R. quadrifida</i> | 87.70  | 27.99 |
| <i>R. quadrifida</i> | 101.41 | 27.99 |
| <i>R. quadrifida</i> | 87.68  | 28.02 |
| <i>R. quadrifida</i> | 87.54  | 28.92 |
| <i>R. quadrifida</i> | 101.64 | 29.03 |
| <i>R. quadrifida</i> | 91.78  | 29.12 |
| <i>R. quadrifida</i> | 102.07 | 30.00 |
| <i>R. quadrifida</i> | 81.28  | 30.33 |
| <i>R. quadrifida</i> | 101.62 | 30.42 |
| <i>R. quadrifida</i> | 81.64  | 30.82 |
| <i>R. quadrifida</i> | 97.53  | 31.26 |
| <i>R. quadrifida</i> | 96.46  | 31.93 |
| <i>R. quadrifida</i> | 78.01  | 31.95 |
| <i>R. quadrifida</i> | 96.35  | 32.07 |
| <i>R. quadrifida</i> | 96.51  | 32.29 |
| <i>R. quadrifida</i> | 91.70  | 32.30 |
| <i>R. quadrifida</i> | 83.17  | 32.44 |
| <i>R. quadrifida</i> | 97.68  | 32.54 |
| <i>R. quadrifida</i> | 103.83 | 32.59 |
| <i>R. quadrifida</i> | 95.59  | 32.76 |
| <i>R. quadrifida</i> | 97.18  | 32.90 |
| <i>R. quadrifida</i> | 101.07 | 33.06 |
| <i>R. quadrifida</i> | 104.31 | 33.88 |
| <i>R. quadrifida</i> | 95.75  | 34.02 |
| <i>R. quadrifida</i> | 100.25 | 34.47 |
| <i>R. quadrifida</i> | 101.14 | 34.56 |
| <i>R. quadrifida</i> | 92.65  | 34.58 |
| <i>R. quadrifida</i> | 99.45  | 34.58 |
| <i>R. quadrifida</i> | 101.33 | 34.60 |
| <i>R. quadrifida</i> | 99.55  | 34.68 |
| <i>R. quadrifida</i> | 99.03  | 34.82 |
| <i>R. quadrifida</i> | 97.57  | 34.92 |
| <i>R. quadrifida</i> | 100.64 | 34.92 |
| <i>R. quadrifida</i> | 98.88  | 35.12 |
| <i>R. quadrifida</i> | 101.58 | 35.18 |
| <i>R. quadrifida</i> | 101.61 | 35.21 |
| <i>R. quadrifida</i> | 101.91 | 35.26 |
| <i>R. quadrifida</i> | 94.06  | 35.63 |
| <i>R. quadrifida</i> | 99.87  | 35.82 |
| <i>R. quadrifida</i> | 99.93  | 35.87 |
| <i>R. quadrifida</i> | 99.68  | 35.89 |
| <i>R. quadrifida</i> | 96.47  | 36.04 |
| <i>R. quadrifida</i> | 101.64 | 36.09 |
| <i>R. quadrifida</i> | 101.51 | 36.26 |
| <i>R. quadrifida</i> | 101.62 | 36.28 |

|                      |        |       |
|----------------------|--------|-------|
| <i>R. quadrifida</i> | 102.18 | 36.29 |
| <i>R. quadrifida</i> | 100.73 | 36.49 |
| <i>R. quadrifida</i> | 77.48  | 36.83 |
| <i>R. quadrifida</i> | 98.17  | 36.87 |
| <i>R. quadrifida</i> | 103.21 | 37.15 |
| <i>R. quadrifida</i> | 101.28 | 37.17 |
| <i>R. quadrifida</i> | 101.29 | 37.18 |
| <i>R. quadrifida</i> | 101.28 | 37.19 |
| <i>R. quadrifida</i> | 101.64 | 37.20 |
| <i>R. quadrifida</i> | 102.72 | 37.27 |
| <i>R. quadrifida</i> | 101.40 | 37.34 |
| <i>R. quadrifida</i> | 97.42  | 37.46 |
| <i>R. quadrifida</i> | 101.62 | 37.47 |
| <i>R. quadrifida</i> | 76.10  | 37.62 |
| <i>R. quadrifida</i> | 75.19  | 37.69 |
| <i>R. quadrifida</i> | 100.25 | 38.11 |
| <i>R. quadrifida</i> | 100.23 | 38.13 |
| <i>R. quadrifida</i> | 95.39  | 38.16 |
| <i>R. quadrifida</i> | 97.94  | 38.31 |
| <i>R. quadrifida</i> | 99.49  | 38.44 |
| <i>R. quadrifida</i> | 99.57  | 38.50 |
| <i>R. quadrifida</i> | 99.87  | 38.70 |
| <i>R. quadrifida</i> | 75.15  | 38.78 |
| <i>R. quadrifida</i> | 96.81  | 38.81 |
| <i>R. quadrifida</i> | 80.59  | 42.58 |
| <i>R. quadrifida</i> | 86.93  | 43.16 |
| <i>R. quadrifida</i> | 86.07  | 43.49 |
| <i>R. quadrifida</i> | 87.72  | 49.29 |
| <i>R. quadrifida</i> | 88.03  | 49.41 |
| <i>R. quadrifida</i> | 88.15  | 49.44 |
| <i>R. sacra</i>      | 86.00  | 28.10 |
| <i>R. sacra</i>      | 85.96  | 28.16 |
| <i>R. sacra</i>      | 99.03  | 28.35 |
| <i>R. sacra</i>      | 91.39  | 28.42 |
| <i>R. sacra</i>      | 98.90  | 28.45 |
| <i>R. sacra</i>      | 87.87  | 28.55 |
| <i>R. sacra</i>      | 92.50  | 28.58 |
| <i>R. sacra</i>      | 92.53  | 28.60 |
| <i>R. sacra</i>      | 85.72  | 28.67 |
| <i>R. sacra</i>      | 90.55  | 28.83 |
| <i>R. sacra</i>      | 91.90  | 28.86 |
| <i>R. sacra</i>      | 88.00  | 28.92 |
| <i>R. sacra</i>      | 93.06  | 28.93 |
| <i>R. sacra</i>      | 89.63  | 28.95 |
| <i>R. sacra</i>      | 93.39  | 28.96 |
| <i>R. sacra</i>      | 90.30  | 28.97 |
| <i>R. sacra</i>      | 90.45  | 28.97 |
| <i>R. sacra</i>      | 90.45  | 28.98 |
| <i>R. sacra</i>      | 90.53  | 28.98 |



|                 |        |       |
|-----------------|--------|-------|
| <i>R. sacra</i> | 92.36  | 29.03 |
| <i>R. sacra</i> | 87.59  | 29.05 |
| <i>R. sacra</i> | 87.57  | 29.07 |
| <i>R. sacra</i> | 90.44  | 29.10 |
| <i>R. sacra</i> | 92.57  | 29.13 |
| <i>R. sacra</i> | 94.27  | 29.21 |
| <i>R. sacra</i> | 90.62  | 29.22 |
| <i>R. sacra</i> | 88.88  | 29.25 |
| <i>R. sacra</i> | 88.87  | 29.27 |
| <i>R. sacra</i> | 88.15  | 29.28 |
| <i>R. sacra</i> | 92.12  | 29.28 |
| <i>R. sacra</i> | 91.98  | 29.30 |
| <i>R. sacra</i> | 89.62  | 29.32 |
| <i>R. sacra</i> | 89.97  | 29.33 |
| <i>R. sacra</i> | 90.05  | 29.33 |
| <i>R. sacra</i> | 85.25  | 29.35 |
| <i>R. sacra</i> | 86.15  | 29.47 |
| <i>R. sacra</i> | 90.92  | 29.53 |
| <i>R. sacra</i> | 85.25  | 29.57 |
| <i>R. sacra</i> | 94.53  | 29.57 |
| <i>R. sacra</i> | 91.15  | 29.58 |
| <i>R. sacra</i> | 91.10  | 29.65 |
| <i>R. sacra</i> | 91.12  | 29.65 |
| <i>R. sacra</i> | 91.05  | 29.67 |
| <i>R. sacra</i> | 91.07  | 29.67 |
| <i>R. sacra</i> | 91.45  | 29.68 |
| <i>R. sacra</i> | 98.58  | 29.68 |
| <i>R. sacra</i> | 91.13  | 29.69 |
| <i>R. sacra</i> | 91.12  | 29.72 |
| <i>R. sacra</i> | 90.98  | 29.73 |
| <i>R. sacra</i> | 91.12  | 29.74 |
| <i>R. sacra</i> | 91.22  | 29.83 |
| <i>R. sacra</i> | 91.24  | 29.84 |
| <i>R. sacra</i> | 99.11  | 29.93 |
| <i>R. sacra</i> | 97.46  | 29.95 |
| <i>R. sacra</i> | 93.89  | 30.00 |
| <i>R. sacra</i> | 100.28 | 30.02 |
| <i>R. sacra</i> | 90.56  | 30.10 |
| <i>R. sacra</i> | 91.52  | 30.28 |
| <i>R. sacra</i> | 91.52  | 30.30 |
| <i>R. sacra</i> | 90.90  | 30.37 |
| <i>R. sacra</i> | 98.27  | 30.86 |
| <i>R. sacra</i> | 98.41  | 31.59 |
| <i>R. sacra</i> | 98.57  | 31.73 |
| <i>R. sacra</i> | 90.00  | 32.00 |
| <i>R. sacra</i> | 97.02  | 32.08 |
| <i>R. sacra</i> | 97.01  | 32.09 |
| <i>R. sacra</i> | 97.03  | 32.12 |
| <i>R. sacra</i> | 96.89  | 32.26 |

|                       |        |       |
|-----------------------|--------|-------|
| <i>R. sacra</i>       | 96.85  | 32.30 |
| <i>R. wallichiana</i> | 100.12 | 27.36 |
| <i>R. wallichiana</i> | 88.90  | 27.53 |
| <i>R. wallichiana</i> | 98.58  | 27.62 |
| <i>R. wallichiana</i> | 98.59  | 27.63 |
| <i>R. wallichiana</i> | 98.75  | 27.77 |
| <i>R. wallichiana</i> | 86.80  | 27.86 |
| <i>R. wallichiana</i> | 98.48  | 27.98 |
| <i>R. wallichiana</i> | 98.48  | 27.99 |
| <i>R. wallichiana</i> | 98.97  | 28.09 |
| <i>R. wallichiana</i> | 86.00  | 28.10 |
| <i>R. wallichiana</i> | 85.99  | 28.12 |
| <i>R. wallichiana</i> | 85.57  | 28.22 |
| <i>R. wallichiana</i> | 98.79  | 28.36 |
| <i>R. wallichiana</i> | 99.81  | 28.57 |
| <i>R. wallichiana</i> | 83.62  | 28.63 |
| <i>R. wallichiana</i> | 84.45  | 28.63 |
| <i>R. wallichiana</i> | 83.88  | 28.82 |
| <i>R. wallichiana</i> | 83.78  | 28.93 |
| <i>R. wallichiana</i> | 101.21 | 29.12 |
| <i>R. wallichiana</i> | 83.97  | 29.22 |
| <i>R. wallichiana</i> | 95.50  | 29.41 |
| <i>R. wallichiana</i> | 94.59  | 29.55 |
| <i>R. wallichiana</i> | 94.61  | 29.65 |
| <i>R. wallichiana</i> | 94.87  | 29.90 |
| <i>R. wallichiana</i> | 95.48  | 29.93 |
| <i>R. wallichiana</i> | 81.33  | 30.13 |
| <i>R. wallichiana</i> | 101.57 | 30.59 |
| <i>R. wallichiana</i> | 79.60  | 30.68 |
| <i>R. wallichiana</i> | 101.23 | 31.01 |
| <i>R. wallichiana</i> | 103.14 | 31.02 |
| <i>R. wallichiana</i> | 98.86  | 31.95 |
| <i>R. wallichiana</i> | 100.31 | 31.97 |
| <i>R. wallichiana</i> | 98.87  | 32.12 |
| <i>R. wallichiana</i> | 77.00  | 33.00 |
| <i>R. wallichiana</i> | 107.38 | 33.97 |
| <i>R. wallichiana</i> | 102.22 | 35.58 |
| <i>R. wallichiana</i> | 74.70  | 36.34 |
| <i>R. wallichiana</i> | 100.09 | 36.57 |
| <i>R. wallichiana</i> | 99.97  | 36.60 |
| <i>R. yunnanensis</i> | 100.13 | 25.63 |
| <i>R. yunnanensis</i> | 100.10 | 25.64 |
| <i>R. yunnanensis</i> | 100.12 | 25.66 |
| <i>R. yunnanensis</i> | 100.14 | 25.69 |
| <i>R. yunnanensis</i> | 100.05 | 25.70 |
| <i>R. yunnanensis</i> | 100.13 | 25.70 |
| <i>R. yunnanensis</i> | 100.04 | 25.73 |
| <i>R. yunnanensis</i> | 100.12 | 25.73 |
| <i>R. yunnanensis</i> | 100.10 | 25.74 |

|                       |        |       |
|-----------------------|--------|-------|
| <i>R. yunnanensis</i> | 100.08 | 25.75 |
| <i>R. yunnanensis</i> | 100.35 | 25.97 |
| <i>R. yunnanensis</i> | 100.37 | 25.97 |
| <i>R. yunnanensis</i> | 102.80 | 26.01 |
| <i>R. yunnanensis</i> | 102.90 | 26.15 |
| <i>R. yunnanensis</i> | 100.71 | 26.21 |
| <i>R. yunnanensis</i> | 99.06  | 26.47 |
| <i>R. yunnanensis</i> | 98.70  | 26.50 |
| <i>R. yunnanensis</i> | 100.14 | 26.55 |
| <i>R. yunnanensis</i> | 98.80  | 26.58 |
| <i>R. yunnanensis</i> | 104.13 | 26.74 |
| <i>R. yunnanensis</i> | 98.94  | 26.90 |
| <i>R. yunnanensis</i> | 101.84 | 27.01 |
| <i>R. yunnanensis</i> | 100.18 | 27.02 |
| <i>R. yunnanensis</i> | 100.10 | 27.06 |
| <i>R. yunnanensis</i> | 99.10  | 27.08 |
| <i>R. yunnanensis</i> | 100.23 | 27.08 |
| <i>R. yunnanensis</i> | 100.25 | 27.11 |
| <i>R. yunnanensis</i> | 100.22 | 27.12 |
| <i>R. yunnanensis</i> | 100.29 | 27.12 |
| <i>R. yunnanensis</i> | 100.22 | 27.13 |
| <i>R. yunnanensis</i> | 101.30 | 27.13 |
| <i>R. yunnanensis</i> | 100.95 | 27.14 |
| <i>R. yunnanensis</i> | 100.22 | 27.16 |
| <i>R. yunnanensis</i> | 100.26 | 27.18 |
| <i>R. yunnanensis</i> | 99.36  | 27.21 |
| <i>R. yunnanensis</i> | 88.87  | 27.48 |
| <i>R. yunnanensis</i> | 99.70  | 27.48 |
| <i>R. yunnanensis</i> | 102.41 | 27.58 |
| <i>R. yunnanensis</i> | 91.90  | 27.59 |
| <i>R. yunnanensis</i> | 99.79  | 27.61 |
| <i>R. yunnanensis</i> | 101.60 | 27.69 |
| <i>R. yunnanensis</i> | 103.20 | 27.78 |
| <i>R. yunnanensis</i> | 102.77 | 27.80 |
| <i>R. yunnanensis</i> | 99.99  | 27.83 |
| <i>R. yunnanensis</i> | 108.68 | 27.88 |
| <i>R. yunnanensis</i> | 99.63  | 27.91 |
| <i>R. yunnanensis</i> | 99.95  | 27.91 |
| <i>R. yunnanensis</i> | 101.62 | 27.91 |
| <i>R. yunnanensis</i> | 108.69 | 27.92 |
| <i>R. yunnanensis</i> | 91.84  | 27.93 |
| <i>R. yunnanensis</i> | 101.29 | 27.94 |
| <i>R. yunnanensis</i> | 99.59  | 27.97 |
| <i>R. yunnanensis</i> | 101.29 | 27.98 |
| <i>R. yunnanensis</i> | 89.39  | 28.02 |
| <i>R. yunnanensis</i> | 99.72  | 28.02 |
| <i>R. yunnanensis</i> | 85.99  | 28.09 |
| <i>R. yunnanensis</i> | 99.87  | 28.13 |
| <i>R. yunnanensis</i> | 100.81 | 28.16 |

|                       |        |       |
|-----------------------|--------|-------|
| <i>R. yunnanensis</i> | 101.18 | 28.22 |
| <i>R. yunnanensis</i> | 99.36  | 28.24 |
| <i>R. yunnanensis</i> | 98.49  | 28.27 |
| <i>R. yunnanensis</i> | 99.16  | 28.28 |
| <i>R. yunnanensis</i> | 103.56 | 28.30 |
| <i>R. yunnanensis</i> | 98.79  | 28.36 |
| <i>R. yunnanensis</i> | 98.80  | 28.39 |
| <i>R. yunnanensis</i> | 103.72 | 28.40 |
| <i>R. yunnanensis</i> | 103.25 | 28.41 |
| <i>R. yunnanensis</i> | 103.35 | 28.41 |
| <i>R. yunnanensis</i> | 98.96  | 28.42 |
| <i>R. yunnanensis</i> | 98.88  | 28.53 |
| <i>R. yunnanensis</i> | 98.78  | 28.56 |
| <i>R. yunnanensis</i> | 102.53 | 28.59 |
| <i>R. yunnanensis</i> | 101.21 | 28.60 |
| <i>R. yunnanensis</i> | 102.57 | 28.61 |
| <i>R. yunnanensis</i> | 99.82  | 28.62 |
| <i>R. yunnanensis</i> | 99.20  | 28.67 |
| <i>R. yunnanensis</i> | 94.00  | 28.75 |
| <i>R. yunnanensis</i> | 100.96 | 28.76 |
| <i>R. yunnanensis</i> | 102.50 | 28.85 |
| <i>R. yunnanensis</i> | 102.17 | 28.87 |
| <i>R. yunnanensis</i> | 102.12 | 28.90 |
| <i>R. yunnanensis</i> | 102.10 | 28.94 |
| <i>R. yunnanensis</i> | 102.10 | 28.96 |
| <i>R. yunnanensis</i> | 99.91  | 29.11 |
| <i>R. yunnanensis</i> | 101.54 | 29.21 |
| <i>R. yunnanensis</i> | 102.27 | 29.21 |
| <i>R. yunnanensis</i> | 101.52 | 29.22 |
| <i>R. yunnanensis</i> | 103.29 | 29.23 |
| <i>R. yunnanensis</i> | 103.31 | 29.46 |
| <i>R. yunnanensis</i> | 103.31 | 29.51 |
| <i>R. yunnanensis</i> | 103.33 | 29.55 |
| <i>R. yunnanensis</i> | 103.28 | 29.57 |
| <i>R. yunnanensis</i> | 103.35 | 29.57 |
| <i>R. yunnanensis</i> | 102.10 | 29.58 |
| <i>R. yunnanensis</i> | 102.83 | 29.59 |
| <i>R. yunnanensis</i> | 102.66 | 29.61 |
| <i>R. yunnanensis</i> | 102.66 | 29.67 |
| <i>R. yunnanensis</i> | 102.54 | 29.72 |
| <i>R. yunnanensis</i> | 102.24 | 29.86 |
| <i>R. yunnanensis</i> | 102.27 | 29.86 |
| <i>R. yunnanensis</i> | 95.61  | 29.92 |
| <i>R. yunnanensis</i> | 94.78  | 29.96 |
| <i>R. yunnanensis</i> | 100.94 | 29.99 |
| <i>R. yunnanensis</i> | 102.27 | 29.99 |
| <i>R. yunnanensis</i> | 100.93 | 30.00 |
| <i>R. yunnanensis</i> | 101.88 | 30.00 |
| <i>R. yunnanensis</i> | 101.98 | 30.00 |

|                       |        |       |
|-----------------------|--------|-------|
| <i>R. yunnanensis</i> | 101.87 | 30.01 |
| <i>R. yunnanensis</i> | 101.96 | 30.04 |
| <i>R. yunnanensis</i> | 101.31 | 30.05 |
| <i>R. yunnanensis</i> | 101.82 | 30.05 |
| <i>R. yunnanensis</i> | 101.94 | 30.13 |
| <i>R. yunnanensis</i> | 101.82 | 30.15 |
| <i>R. yunnanensis</i> | 101.99 | 30.34 |
| <i>R. yunnanensis</i> | 102.79 | 30.37 |
| <i>R. yunnanensis</i> | 101.77 | 30.55 |
| <i>R. yunnanensis</i> | 102.12 | 30.59 |
| <i>R. yunnanensis</i> | 102.76 | 30.70 |
| <i>R. yunnanensis</i> | 102.17 | 30.76 |
| <i>R. yunnanensis</i> | 101.90 | 30.96 |
| <i>R. yunnanensis</i> | 102.35 | 30.98 |
| <i>R. yunnanensis</i> | 101.88 | 31.04 |
| <i>R. yunnanensis</i> | 103.17 | 31.04 |
| <i>R. yunnanensis</i> | 102.23 | 31.05 |
| <i>R. yunnanensis</i> | 109.93 | 31.37 |
| <i>R. yunnanensis</i> | 110.03 | 31.41 |
| <i>R. yunnanensis</i> | 103.54 | 31.50 |
| <i>R. yunnanensis</i> | 102.81 | 31.66 |
| <i>R. yunnanensis</i> | 103.80 | 31.67 |
| <i>R. yunnanensis</i> | 101.19 | 31.81 |
| <i>R. yunnanensis</i> | 102.26 | 31.88 |
| <i>R. yunnanensis</i> | 102.20 | 31.90 |
| <i>R. yunnanensis</i> | 101.05 | 31.95 |
| <i>R. yunnanensis</i> | 103.45 | 31.98 |

---

## Supplementary Material2 Phtyon script

#Reclassify according to the threshold:

```
import arcpy
from arcpy import env
from arcpy.sa import *
# Check out the ArcGIS Spatial Analyst extension license
arcpy.CheckOutExtension("Spatial")
# Input path
InRasPath = "D:\\OriginalToTif\\"
env.workspace = InRasPath
# Output path
OutRaspath = "D:\\Reclassify\\"
arcpy.env.workspace = InRasPath
files = arcpy.ListFiles("*.tif")
print files
for file in files:
    input = arcpy.Raster(file)
    output = Con(input >0.286516667, 1, 0)
    output.save("D:\\Reclassify\\"+ file)
print "Good job!!!!"
```

#Convert to rectangular projection:

```
import arcpy
from arcpy import env
from arcpy.sa import *
# Check out the ArcGIS Spatial Analyst extension license
arcpy.CheckOutExtension("Spatial")
# Input path
InRasPath = "E:\\raster\\"
env.workspace = InRasPath
# Output path
OutRaspath = "E:\\sin\\"
arcpy.env.workspace = InRasPath
files = arcpy.ListFiles("*.tif")
print files
for file in files:
    arcpy.ProjectRaster_management(file, OutRaspath + "sin_" + file, \
    "PROJCS['SINUSOIDAL_Unspecified_Datum_Semi_major_axis_6371007_181000_Semi_minor_axis_0_0', \
    GEOGCS['', DATUM['D_unknown', SPHEROID['Unknown', 6371007.181, 0.0]], PRIMEM['Greenwich', 0.0], \
    UNIT['Degree', 0.0174532925199433]], PROJECTION['Sinusoidal'], PARAMETER['false_easting', 0.0], \
    PARAMETER['false_northing', 0.0], PARAMETER['central_meridian', 0.0], UNIT['Meter', 1.0]]", \
    "NEAREST", "1000", "WGS_1984_Major_Auxiliary_Sphere_To_WGS_1984", "", "GEOGCS['GCS_WGS_1984', \
    DATUM['D_WGS_1984', SPHEROID['WGS_1984', 6378137.0, 298.257223563]], PRIMEM['Greenwich', 0.0], \
    UNIT['Degree', 0.0174532925199433]]")
    print file + " done"
print "Good job!!!!"
```

#Calculate for suitable area:

```
import xlwt
```

```

import arcpy
arcpy.CheckOutExtension("spatial")
arcpy.env.overwriteOutput = True
inpath = "D:\\int\\"
arcpy.env.workspace = inpath
files = arcpy.ListFiles("*.tif")
outpath = "D:\\Cal_area\\"
wb = xlwt.Workbook()
ws = wb.add_sheet('area')
times = 1
ws.write(0, 0, "IMAGE")
ws.write(0, 1, "AREA")
for file in files:
    print file
    rows = arcpy.UpdateCursor(file)
    ws.write(times, 0, file)
    for row in rows:
        print row.VALUE
        if row.VALUE == 1:
            ws.write(times, 1, row.COUNT)
        else:
            print "nothing"
    times = times + 1
wb.save(outpath + "cal_area.xls")
print "Good job!!!!!"

```

#Calculate for mean elevation:

```

import xlwt
import arcpy
arcpy.CheckOutExtension("spatial")
arcpy.env.overwriteOutput = True
inpath = "D:\\int\\"
arcpy.env.workspace = inpath
files = arcpy.ListFiles("*.tif")
outpath = "D:\\Cal_mean_alt\\"
wb = xlwt.Workbook()
ws = wb.add_sheet('alt')
times = 1
ws.write(0, 0, "IMAGE")
ws.write(0, 1, "Mean Elevation")
elevation = "D:\\alt\\alt.tif"
for file in files:
    ws.write(times, 0, file)
    zs_table = inpath + "output_" + str(times)
    arcpy.gp.ZonalStatisticsAsTable_sa(file, "Value", elevation, zs_table, "DATA", "ALL")
    query_in_row = "Rowid"
    srows = arcpy.SearchCursor(zs_table, "")
    for srow in srows:
        mean = srow.MEAN

```

```

    if srow.VALUE == 1:
        ws.write(times, 1, round(mean))
    else:
        print "nothing"
del zs_table
times = times + 1
wb.save(outpath + "mean_alt.xls")
print "Good job!!!!!"

#Calculate for mean longitude and latitude:
import xlwt
import arcpy
arcpy.CheckOutExtension("spatial")
arcpy.env.overwriteOutput = True
inpath = "D:\\int\\"
arcpy.env.workspace = inpath
files = arcpy.ListFiles("*.tif")
outpath = "D:\\mean_lat_lon\\"
wb = xlwt.Workbook()
ws = wb.add_sheet('center')
times = 1
ws.write(0, 0, "IMAGE")
ws.write(0, 1, "Mean")
center = "D:\\XY\\y_cor.tif"
for file in files:
    ws.write(times, 0, file)
    zs_table = inpath + "output_" + str(times)
    arcpy.gp.ZonalStatisticsAsTable_sa(file, "Value", center, zs_table, "DATA", "ALL")
    query_in_row = "Rowid"
    srows = arcpy.SearchCursor(zs_table, "")
    for srow in srows:
        mean = srow.MEAN
        if srow.VALUE == 1:
            ws.write(times, 1, mean)
        else:
            print "nothing"
del zs_table
times = times + 1
wb.save(outpath + "mean_center.xls")
print "Good job!!!!!"

```

## References

- 1 Zhang, J., Meng, S., Allen, G. A., Wen, J. & Rao, G. Rapid radiation and dispersal out of the Qinghai-Tibetan Plateau of an alpine plant lineage *Rhodiola* (Crassulaceae). *Molecular Phylogenetics and Evolution* **77**, 147-158 (2014).
- 2 Gao, Q. *et al.* Chloroplast DNA phylogeography of *Rhodiola alsia* (Crassulaceae) in the Qinghai-Tibet Plateau. *Botany-Botanique* **87**, 1077-1088 (2009).
- 3 Gao, Q. *et al.* Intraspecific divergences of *Rhodiola alsia* (Crassulaceae) based on plastid DNA and internal transcribed spacer fragments. *Botanical journal of the Linnean Society* **168**, 204-215 (2012).
- 4 Hou, Y. & Lou, A. Population Genetic Diversity and Structure of a Naturally Isolated Plant Species, *Rhodiola*



- dumulosa (Crassulaceae). *PLoS ONE* **6**, e244979 (2011).
- 5 Hou, Y. & Lou, A. Phylogeographical patterns of an alpine plant, *Rhodiola dumulosa* (Crassulaceae), inferred from chloroplast DNA sequences. *Journal of Heredity* **105**, 101-110 (2014).
- 6 Lei, Y. *Genetic diversity and phytochemical diversity of Rhodiola crenulata in China revealed by ISSR markers and essential oils*. Doctor thesis, Fudan University, (2004).
- 7 Mu, Y., Zhang, Y. & Lou, A. A preliminary study on floral syndrome and breeding system of the rare plant *Rhodiola dumulosa*. *Journal of Plant Ecology* **31**, 528-535 (2007).
- 8 Xia, T. *et al.* ISSR analysis of genetic diversity of the Qinghai-Tibet Plateau endemic, *Rhodiola chrysanthemifolia* (Crassulaceae). *Biochemical Systematics and Ecology* **35**, 209-214 (2007).
- 9 Zhang, J., Meng, S. & Rao, G. Phylogeography of *Rhodiola kirilowii* (Crassulaceae): A Story of Miocene Divergence and Quaternary Expansion. *PLoS ONE* **9**, e112923 (2014).
- 10 Zheng, W. *The research on the ecological character of Longwhip Rhodiola's population on Mt. Sergyela, Tibet*. Doctor thesis, Central South University of Forestry and Technology, (2010).
- 11 Zhu, L. & Lou, A. Mating system and pollination biology of a high-mountain perennial plant, *Rhodiola dumulosa* (Crassulaceae). *Journal of Plant Ecology* **3**, 219-227 (2010).
